# Supplementary material for: Proteomic Analyses of Human Cytomegalovirus Strain AD169 Derivatives Reveal Highly Conserved Patterns of Viral and Cellular Proteins in Infected Fibroblasts
Source: Viruses. 2014 Jan 7;6(1):172–88. doi: 10.3390/v6010172 (PMC3917437; doi:10.3390/v6010172)
Supplement: Supplementary File 1 — Supplementary Information (XLSX, 395 KB) [file viruses-06-00172-s001.xlsx]

## Sheet: TOP3 quantification
description	mw	max score	reported peptides	entry	Mock 2h 1	Mock 2h 2	Mock 2h 3	Mock 2h 4	Mock 2h 5	Mock 2d 1	Mock 2d 2	Mock 2d 3	Mock 2d 4	Mock 2d 5	Mock 4d 1	Mock 4d 2	Mock 4d 3	Mock 4d 4	Mock 4d 5	BAD 2h 1	BAD 2h 2	BAD 2h 3	BAD 2h 4	BAD 2h 5	BAD 2d 1	BAD 2d 2	BAD 2d 3	BAD 2d 4	BAD 2d 5	BAD 4d 1	BAD 4d 2	BAD 4d 3	BAD 4d 4	BAD 4d 5	HB15 2h 1	HB15 2h 2	HB15 2h 3	HB15 2h 4	HB15 2h 5	HB15 2d 1	HB15 2d 2	HB15 2d 3	HB15 2d 4	HB15 2d 5	HB15 4d 1	HB15 4d 2	HB15 4d 3	HB15 4d 4	HB15 4d 5
14+3+3+protein+beta+alpha+OS+Homo+sapiens+GN+YWHAB+PE+1+SV+3	28196.5	23462	14	1433B_HUMAN	46322.7	48219	52862.3	50453.3	48761.7	46649	47499.7	45226	45570.3	47255.3	43992.3	41642.3	43572.7	44133	44779	48954.7	48294.3	47638.7	50120.3	50295.3	36086.3	36193.4	41091.3	43902.7	33628.9	51953.7	51475.7	50930.7	49428.7	33204.3	46440	52133.3	51025.7	43829.7	46186.3	67233.3	65979.3	66517.3	64798	65541.7	31205	32446.3	31556.7	30535.7	34873.3
14+3+3+protein+epsilon+OS+Homo+sapiens+GN+YWHAE+PE+1+SV+1	29345	44782.7	14	1433E_HUMAN	79130.7	80829	87538	82891	91063	88730.3	86273	88233.7	84186	88000.7	78660	84826.7	86900.7	83252	91203	88079.3	89337.3	88882	91486.7	86542.7	77182	80102	85480	81179.3	85458.3	88129.3	89136.3	88990	83315	76636.7	74501	89471	81543.3	85151.3	80164.3	123580	119541	123606	112876	115019	62214.7	66785	64366	59378.7	61127.7
14+3+3+protein+eta+OS+Homo+sapiens+GN+YWHAH+PE+1+SV+4	28389.9	4602.89	10	1433F_HUMAN	30044.3	20595.7	21400.7	22330.3	30225	28827.7	26318.3	26989.7	27823	41930.7	20529.3	19708.7	25688	22517.3	19904	19300	18647	22948	20785.3	31471.3	24352	20616	24722.7	22866.3	16404.3	9881	16893.3	23516	13778	16818	36822.3	36434.7	38771.3	20916.7	24611	27691.7	44589.3	42019.3	41679.3	41808.7	19264.7	19265	19640.7	33869	30960.3
14+3+3+protein+gamma+OS+Homo+sapiens+GN+YWHAG+PE+1+SV+2	28473.7	20124.9	12	1433G_HUMAN	45533.3	45077.3	53879	57822.6	54437.5	43245	46695.3	49207	55707	52333.7	20595.7	26839	42994	44591.7	34061	46309.4	46621	59194.3	54814.7	59604.7	32444.7	36623.2	60537.8	58389	53220.8	56492	67244	64545.7	62109.7	47591.7	59823.8	50170.2	49212.9	45504	58071	82128.3	78324.3	91196.3	91125.7	89801.7	46046.3	43113	27297.7	29295.3	31276.7
14+3+3+protein+sigma+OS+Homo+sapiens+GN+SFN+PE+1+SV+1	27888.2	3200.81	4	1433S_HUMAN	2177.39	3507.55	5618.12	5405.54	4452.84	1957.64	2564.19	3156.93	3227.69	2787.84	1237.65	2279.51	1213.54	1255.67	1230.86	2560	3105.81	3350.75	2342.96	6292.35	14325.4	13284.3	8528.13	11190.9	14236.1	7657.08	6752.88	6837.28	7689.89	6783.11	3033.92	5303.47	3445.28	8517.85	3550.55	8077.18	5870.11	1767.73	1807.96	4901.06	7138.15	5815.58	5873.14	7726.16	8504.12
14+3+3+protein+theta+OS+Homo+sapiens+GN+YWHAQ+PE+1+SV+1	28049.4	30894.7	15	1433T_HUMAN	37336.3	36192.3	33835	34587.3	39719.7	49921.3	45991.7	45827	45840.7	45309.3	31736.7	37627.3	34434.3	37489.7	37774	36427	37785.7	37669	35449	39772.7	42703	44667	35099	46223.3	33897.3	66177.7	52548.7	51391.7	62553.7	46316.7	42200.3	42650	40281.7	42881.3	30301	68785	67282	67624.3	73824.7	66190.7	40856	40577.7	40300.7	49029.3	40412.7
14+3+3+protein+zeta+delta+OS+Homo+sapiens+GN+YWHAZ+PE+1+SV+1	27916.2	26168.7	15	1433Z_HUMAN	120294	140673	123903	115302	116206	114565	132206	137023	108939	121661	117102	108974	119625	111274	133308	125675	143327	135371	136351	140278	124898	121459	125797	119782	118113	93561.3	100673	102645	99322.7	86082.7	122533	125878	118814	116319	117595	149599	154579	147816	145760	137381	76058	76468	80841.3	71137	69140.3
HLA+class+I+histocompatibility+antigen+Cw+12+alpha+chain+OS+Homo+sapiens+GN+HLA+C+PE+1+SV+2	41342	1836.62	4	1C12_HUMAN	40208.3	47383	48268	42907	37950	46569.7	49926.7	48484.7	47565.3	28583.5	32207.7	33859.3	45129.3	42981.3	47803.3	43042.7	40391.7	40265.5	42271.5	26267	19115	21863	3615		9988	1198					28303	29441	18875	28681.5	47886	24487	12951.3	25223	17478.5	25078	22172		5601		26246.5
Serine+threonine+protein+phosphatase+2A+65+kDa+regulatory+subunit+A+alpha+isoform+OS+Homo+sapiens+GN	66107.1	2695.44	23	2AAA_HUMAN	58304	60354.7	55183.3	61535.3	54086.3	64802.7	63407.3	60445.3	56797.7	51111.3	49048.3	51499.3	55523.3	49383.7	47595.7	58264.3	58456.3	59637	64169.3	51462	45195.3	45050	50490.7	53264	52720.3	46626.3	45968	50252.7	47808.7	31476.7	48995.3	54979.7	54200	50105.3	43211	57228.7	57850.7	53727.3	59052	62554.3	46088.3	43644	45995.7	44864.7	42432.3
Serine+threonine+protein+phosphatase+2A+65+kDa+regulatory+subunit+A+beta+isoform+OS+Homo+sapiens+GN	66840.9	1204.11	8	2AAB_HUMAN	15571.8	19307.7	18543.7	27162.7	15674.3	16982.7	18034	26961	17318	25117.3	7060.09	11245.1	13346.9	19822.8	15600.3	12201.2	13412.8	14642.4	19739	19817.9	21871.2	22866.9	22179.2	24617.4	25398.7	5228.2	2241.11	2319.85	5509.83	3856.73	22637.8	23333.6	21734.9	24896.8	26916	14779.3	25187	27068.3	19812.7	14284.2	3576.73	5983.89	10413.2	7113.83	3241.35
6+phosphogluconate+dehydrogenase+decarboxylating+OS+Homo+sapiens+GN+PGD+PE+1+SV+3	53653.3	3755.2	11	6PGD_HUMAN	39321.7	43943.3	42459.7	38301.3	40191.7	38817.3	35863	39670.7	44087	38753	33399.3	33780.3	33962.7	37770	32675.7	37224.3	36812.3	38120.7	33553.7	39063	35187.3	40282.3	43740.7	44112.3	41304.7	51523.3	53133.7	53199	59108	51937.7	38525.7	43173.3	43369.3	44530.7	42914	44772.3	49365.7	55078	45006.3	51531.7	56410.3	54584.3	53580.3	51888	56884
Aspartate+aminotransferase+cytoplasmic+OS+Homo+sapiens+GN+GOT1+PE+1+SV+3	46475.7	1632.92	3	AATC_HUMAN	17001	19094.5	16395.3	19437	17477	18071	17641.3	11504.5	16009.7	14650	16174.3	11721.5	14686	9983	15191	16514	16597.3	19649	17859	22433.5	23349	18430	19061	19706	17848	27654.3	29314.3	28894.3	30310.3	27226	15677	15251.7	16274.7	16996.3	16431.7	23233	19451	22108	21433.3	19164.5	27789	26432.5	30241.7	29491.7	25758.7
ATP+citrate+synthase+OS+Homo+sapiens+GN+ACLY+PE+1+SV+3	121752	988.196	22	ACLY_HUMAN	51309.7	52605.7	52258.3	53438.7	51769.7	44879.3	43621.7	37862.7	46761.7	46300.7	48719.3	46811.3	49178.3	50949	44352	54336.3	50745.3	43775	45322.7	49145.3	66598	56630.3	61185.7	55955.3	55087.3	55914.3	60282.7	56042.7	55500	54855.7	47417	42138	41953	41910.7	50142.3	48234	49298.3	40366.7	51371.3	48305.7	62887	60861	61226.7	59784.3	59561
Aconitate+hydratase+mitochondrial+OS+Homo+sapiens+GN+ACO2+PE+1+SV+2	86166.9	2777.21	11	ACON_HUMAN	11282.3	11773.7	12788.7	15550.3	15055.3	14232.3	14079	14017.3	14218.7	16751	11575	9712.33	12654.7	11910	11127	10624.3	11099	11951.3	14779.7	17242.3	34798.3	34671	41823.3	39999.3	28830	52121.7	47724.7	53373	52667	57430.7	13214	13931	15169.7	13837.3	14145.7	29533.3	27415.7	30818	30971	29146	54212.3	55267	56340.3	52930.7	55864
Beta+actin+like+protein+2+OS+Homo+sapiens+GN+ACTBL2+PE+1+SV+2	42345.5	22298.4	8	ACTBL_HUMAN	15498.5	13180.9	14063.3	15710	17869.7	10514.2	5466.33	10081.1	9125.4	16548.3	10702.3	15578.2	12368.7	11263.5	19659	11047.4	13363.1	10838.5	14723.4	15808	18965.4	10532.4	16753.7	17197	14600.7	17119.7	9982.38	14268	11130.5	11316.3	8173.1	16942.1	16080.6	19778.5	27193.8	6289.19	3784.21	11547.7	9072.44	9447.08	12503.4	15292.6	18718.3	12649	12292.2
Putative+beta+actin+like+protein+3+OS+Homo+sapiens+GN+POTEKP+PE+5+SV+1	42358.5	21354.9	6	ACTBM_HUMAN	5431.78	4201.31	2081.82	4361.67	5082.14	5174.98	5332.15	5229	3986.95	4582.15	5963.81	6826.84	6070.27	4157.89	6662.88	4086.18	4571.7	3782.8	4195.95	3699.63	4565.71	4800.03	4682.9	4377.55	4128.3	2654.37	2516.26	2394.01	3357.42	3059.73	4781.34	5161.72	2344.42	5701.96	5586.98	79048.8	80433.5	70661	41198.5	50239.9	550.905	557.131	1215.17	541.488	536.564
Actin+cytoplasmic+1+OS+Homo+sapiens+GN+ACTB+PE+1+SV+1	42079	107858	20	ACTB_HUMAN	2.82753e+06	2.83801e+06	3701833	2620246	2.50404e+06	2.94716e+06	2.72141e+06	3.94276e+06	3.04175e+06	2767849	2.61973e+06	4.02078e+06	3012977	2.64529e+06	3.26724e+06	2.65634e+06	2.91459e+06	2.52722e+06	2536099	2.14414e+06	1.55596e+06	1.51621e+06	2.43922e+06	1.14563e+06	1.52474e+06	1.20097e+06	1.67083e+06	1.68025e+06	1.44321e+06	1.06112e+06	2242109	2177136	2776007	2727153	2.29859e+06	2.87388e+06	2.05253e+06	2.78259e+06	2.82477e+06	1.72112e+06	1103508	1148794	868485	1.14714e+06	993912
Actin+alpha+cardiac+muscle+1+OS+Homo+sapiens+GN+ACTC1+PE+1+SV+1	42361.2	30390.1	20	ACTC_HUMAN	2.14311e+06	1.90945e+06	2.04663e+06	1.88959e+06	1.62107e+06	2.24618e+06	2.1525e+06	2.43829e+06	2.11961e+06	1.42526e+06	1.58624e+06	2.53963e+06	1.64482e+06	2.12499e+06	2.08601e+06	2.12366e+06	1.94628e+06	2.40418e+06	1.58331e+06	1.89772e+06	871411	815338	837284	750329	988906	552278	576144	492959	545585	508486	1.86016e+06	1.63093e+06	1.42158e+06	1.5268e+06	1.66245e+06	860179	760315	822958	799361	808101	490133	418520	442364	461736	451273
Alpha+actinin+1+OS+Homo+sapiens+GN+ACTN1+PE+1+SV+2	103628	12332.6	54	ACTN1_HUMAN	149143	156127	158174	150553	143381	160150	161887	158537	159282	138390	162516	168412	169139	166821	171940	156523	161493	163144	161336	148492	88671.2	91086.2	92898.7	92712.7	89080.6	71129	68304.8	69403.5	69541.8	67994.7	159141	155933	155128	154493	146903	105103	104610	114999	116548	101480	77211.8	78341.7	80820.3	74462.2	75998.6
Alpha+actinin+2+OS+Homo+sapiens+GN+ACTN2+PE+1+SV+1	104424	3177.05	24	ACTN2_HUMAN	92041.8	96364.1	101414	102069	100927	38294.5	112437	114103	114483	129068	101584	111842	116979	115991	127006	90809	29610.6	97512.4	93950.6	103119	97124.8	100207	99252.2	102683	110728	131437	134820	141204	143515	151700	110730	108417	108215	115997	120348	137564	146580	148960	152268	165573	87882.3	96569.3	88772.3	88202	102235
Alpha+actinin+3+OS+Homo+sapiens+GN+ACTN3+PE+1+SV+2	103983	2474.11	23	ACTN3_HUMAN	84825.7	83664.7	96754.3	103006	92263.7	90493.3	131526	97403	91087.3	91417	82356.5	81939.8	81080	84483.7	87451.3	84794.7	87696	87602	105455	104155	88985.3	84732	83273	83189	78985	65674.7	61504.3	78035.7	62493.6	22524.8	53388.3	89779	86390	94944.7	83261.3	88959.3	76631.3	74735	87504.3	84669	73962	76923.3	48693.7	85188	29263.9
Alpha+actinin+4+OS+Homo+sapiens+GN+ACTN4+PE+1+SV+2	105310	8545.08	48	ACTN4_HUMAN	111851	114020	112246	114488	107484	123734	123173	124634	125890	120145	114668	116902	120925	123588	121156	105989	105661	108383	109716	106944	76239.4	75988.1	71257	76136.3	73456.4	70077	60091.6	60042.2	61839.2	58385.5	116046	114781	114181	117036	112607	95820.7	91092.3	92523	94305.2	95412.7	72166.5	73695.6	76337.8	74933.1	79414.4
Actin+alpha+skeletal+muscle+OS+Homo+sapiens+GN+ACTA1+PE+1+SV+1	42393.3	33165.8	18	ACTS_HUMAN	1.07155e+06	954727	1.02331e+06	944795	810533	1.12309e+06	1.07625e+06	1.21914e+06	1.0598e+06	712631	793122	1.26982e+06	822412	1.0625e+06	1.043e+06	1.06161e+06	972924	1.20184e+06	791385	948660	435553	407549	418497	375013	494311	275853	287723	246158	272534	254004	930005	815406	710723	763335	831164	429885	380113	411296	399641	404007	244993	209186	221107	230795	225563
ADP+ATP+translocase+1+OS+Homo+sapiens+GN+SLC25A4+PE+1+SV+4	33292.7	4086.57	9	ADT1_HUMAN	12500.7	15410	14356.1	15550.6	14932.5	13797.3	15425.1	15414.6	16186.3	16973.8	13828.5	17326.6	14123.8	16257.4	19609.9	16219.4	16212.4	22604	16837.1	21857.3	25066.9	23305.3	27762.4	28171.1	24254.9	25995.9	28107.8	24236.4	22354.6	27088.2	19296.8	24157.7	20798.7	21644.4	18380.4	25495.8	28005.4	28959	29025.3	27955.6	23554.8	28552.1	32257.4	29914	27704.2
ADP+ATP+translocase+2+OS+Homo+sapiens+GN+SLC25A5+PE+1+SV+7	33080.4	5982.64	11	ADT2_HUMAN	20472	13917.1	16474.6	14475.8	17576.2	16150.4	17769.5	16452	17003.5	16449.8	11995.7	13352.9	12401.2	12056.9	13580.5	18891.8	18702.3	19989.9	18379.1	21888.3	43842	45030.7	44303.7	44098.4	44614.4	36638.4	36540.5	32999.1	26466.4	33920.4	11936.6	12937.5	10024.4	12317.6	13368.1	32919.1	33795.3	32244.1	31420.7	30933	41655	43188.7	44316.7	44358.1	44670.3
ADP+ATP+translocase+3+OS+Homo+sapiens+GN+SLC25A6+PE+1+SV+4	33094.4	5067.23	11	ADT3_HUMAN	42556.6	39997.4	42434.6	38350	44638.9	42807.5	46455.1	44387.7	43717.7	37524.9	37165.1	38116.2	38370.1	32698.8	39788.5	47914.5	49189.3	48972	47786.5	45449	120537	127560	127238	128136	128583	109916	106325	104308	78672	108157	36274.5	49329.1	48027.5	49004.1	51161.2	81732.7	83072.4	82369	79241.5	75756.5	102417	108141	107862	109556	108199
ADP+ATP+translocase+4+OS+Homo+sapiens+GN+SLC25A31+PE+1+SV+1	35307.1	2405.57	6	ADT4_HUMAN	25522.4	27597.3	20532	19433.9	39476.3	16450.8	29298.3	22187.3	19914.6	41954.8	11442.8	12993.2	14893.8	21295.5	21335.4	24403	25964.6	19641.8	17258.6	38427.1	42390	42680.9	45062.7	43763.2	44613.2	31443.4	37820.7	38785.9	24708.3	38846.6	35538.5	34453	15993.3	37062.9	18499.9	52895.1	53730.1	25461	52009.2	53238.9	46508.6	50236.1	52666.9	50714.5	47766
Neuroblast+differentiation+associated+protein+AHNAK+OS+Homo+sapiens+GN+AHNAK+PE+1+SV+2	629616	1752.48	109	AHNK_HUMAN	175146	176025	164564	156538	165082	155566	173132	151090	157099	162452	128232	155654	168073	173136	173669	179634	161361	179055	166656	162348	137040	122569	131083	133720	138692	117956	105811	113456	114729	104857	164336	158074	149639	156480	169697	130146	121949	116062	119723	127028	91790.7	83258.3	106559	119775	119745
Alpha+internexin+OS+Homo+sapiens+GN+INA+PE+1+SV+2	55561.8	1423.42	3	AINX_HUMAN	1128.03	2255.87	2880.24	1454.48	2090.11	3001.69	1673.37	1693.92	2171.95	2267.86	3832.8	4056	1838.86	1139.25	2362.06	2452.52	1291.94	4416.57	2264.57	5382.73	3895.26	2610.87	2712.53	5029.24	3090.39	1539.42	3732.23	1509.71	3604.33	2915.22	1422.87	1141.49	1894.46	1941.05	993.554	1105.43	720.683	489.019	683.494	1532.81	1666.68	2401.65	1539.58	1617.05	1591.94
Retinal+dehydrogenase+1+OS+Homo+sapiens+GN+ALDH1A1+PE+1+SV+2	55489.2	14762.6	25	AL1A1_HUMAN	264181	264331	260905	250242	250345	204275	211878	209178	210523	207342	222227	240743	239867	235254	230688	244075	234520	230908	288292	232983	93861.3	100773	102553	105070	105001	65948.7	56767	72943.3	64223.3	66396.7	249917	224883	214423	245061	230155	126265	120541	123173	121834	125892	57794.7	65087	72258	50382.7	68328.3
Alpha+aminoadipic+semialdehyde+dehydrogenase+OS+Homo+sapiens+GN+ALDH7A1+PE+1+SV+5	59057.5	886.72	2	AL7A1_HUMAN	39301	40049	28470	32564.5	30237	26689	29989	33394	23746.5	22331	23615.5	24854.5	24810.5	26086	29755.5	28493	30513	29516	28940	32380	33809	49507	50503	23852	28353.5	28859	26360.5	22016	25058.5	14807	30262	30706.5	45451	34456	32363	27805.5	30602.5	30025.5	20483.5	29725.5	34771	34773	33601	19260	12554
Fructose+bisphosphate+aldolase+A+OS+Homo+sapiens+GN+ALDOA+PE+1+SV+2	39876.3	15551.3	20	ALDOA_HUMAN	345081	242608	241378	248447	256500	225697	230108	242253	243732	237421	246903	259649	254248	253284	256966	248863	207756	237564	241190	243469	238567	227150	232856	214958	216071	207503	206768	212472	216680	191874	249696	253352	193409	265003	253858	259953	248809	232971	249336	249077	214657	222691	218333	223504	225129
Fructose+bisphosphate+aldolase+B+OS+Homo+sapiens+GN+ALDOB+PE+1+SV+2	39986.3	1224.39	5	ALDOB_HUMAN	16852.1	19263.2	22648.2	32325.2	22850.5	12768.4	16306	20938	21885	20263.3	10581.5	5441.07	14723.3	9160.67	23240	14737.8	16365.6	21347.7	24068.7	27247.7	25754.5	37206.7	34517.6	35859.3	33483	38041.2	32622.5	34049.1	45046.6	29724.9	26659.8	36202	31134.7	23551.2	22819.6	30006.6	34617.9	29915.6	26592.6	31585.3	17304	30827.9	36204.9	26257.9	15594.7
Fructose+bisphosphate+aldolase+C+OS+Homo+sapiens+GN+ALDOC+PE+1+SV+2	39855.1	5837.82	13	ALDOC_HUMAN	49993.3	46090.5	27519.3	28807.7	36114.7	55009.8	57734.3	55880.7	55630.3	31502	24774.9	50172.3	49327	49734.3	26042	48693.9	39930	28978.3	28954.7	47573	31535.3	26092	26525.4	25483.3	22343.3	19577.6	20169.1	19782	20251	21135	29835.3	28687	28375	32905.7	18692	26363.3	17034.7	25792.7	19714.2	12182.7	20286	18584.1	18445.4	16518.4	17012.3
Aldose+reductase+OS+Homo+sapiens+GN+AKR1B1+PE+1+SV+3	36252.6	1418.05	2	ALDR_HUMAN		7956	14951	8341.5	4299	6117.5	6852	8405.5	9329.5	4855	7433	8104	6708	7665	13118		7859	7199	8689.5	8102.5		8409	4352			14301	16744	12341.5	12387	5937	13145	12646	6395.5	9808	3540.5	15770.5	13555.5	12131.5	12923.5	9275	10721.5	8754	9214.5	6401	13920.5
Aminopeptidase+N+OS+Homo+sapiens+GN+ANPEP+PE+1+SV+4	109939	9260.99	33	AMPN_HUMAN	144321	149143	147183	144658	156041	145087	143948	143884	141324	155660	131600	133249	135103	136841	129843	142259	143623	144435	145101	138898	138721	150418	134749	137618	108213	105173	100980	112251	110903	96501.3	150675	162433	161249	143873	157455	129351	133553	115087	115290	106512	81287.7	93898.7	86834.3	93249	72749.7
Annexin+A1+OS+Homo+sapiens+GN+ANXA1+PE+1+SV+2	38942.4	20775.3	21	ANXA1_HUMAN	211104	211869	204096	202253	185799	194992	193677	190601	190499	181378	165249	169485	172448	169793	155851	204627	203390	200775	198978	195062	127023	119898	118309	119185	112875	85130	95217.7	92282.7	93483.7	88986.7	201438	200184	201021	214368	198109	134302	128380	140994	130872	134506	90406.3	96656	97134.3	98853	93469.3
Annexin+A2+OS+Homo+sapiens+GN+ANXA2+PE+1+SV+2	38832.2	56259.6	24	ANXA2_HUMAN	681714	678202	669433	643283	714741	632854	623385	606968	603151	729036	588260	572288	639720	622049	551890	677113	654301	678919	646595	664730	422685	377493	437855	462975	486081	320835	336744	321612	315302	311909	647710	632182	730674	732466	664582	422762	434690	468522	448031	454452	354198	357078	361293	367539	366995
Annexin+A5+OS+Homo+sapiens+GN+ANXA5+PE+1+SV+2	35993.9	18529.1	20	ANXA5_HUMAN	176329	175986	169200	171733	161312	172163	168155	169878	167557	163035	133888	135896	132745	133155	130668	170119	171060	170573	169944	168946	166392	168423	165790	166061	168839	146736	152517	151941	151169	152742	183856	188559	187875	190123	184345	184583	180019	179991	180107	174660	110651	118384	116784	112709	119346
Annexin+A6+OS+Homo+sapiens+GN+ANXA6+PE+1+SV+3	76215.6	6581.17	30	ANXA6_HUMAN	85094.3	74017.3	79800	83587.3	79990.7	84552.7	82975.3	80940.7	79183.7	80026	83058.3	76224.7	82265.7	82474.7	82297.3	86333.7	81283.7	88441	85874.7	82037.7	58380	56040.3	54885.7	55589.3	53749.7	66257.7	64479.7	60357.3	57474.3	58388	91879	84565	88801.7	92741.3	90576	66342	66383	68912	62850.3	64796.3	64143.3	64185.3	57580	62012.7	60750.7
AP+2+complex+subunit+alpha+1+OS+Homo+sapiens+GN+AP2A1+PE+1+SV+3	108630	459.202	3	AP2A1_HUMAN	13272.7	16927	11258	13080	15759.7	15213.5	14695	15103.7	15219	13238.5	13583.7	13467.3	16051.5	15796	15184.3	14358.3	13726.3	13956.3	12871	10384.7	15258.7	13394.3	17038.7	18582.7	17124.3	13165.5	20973	19972.7	17456.3	21964.5	15604.7	14138.3	16186.5	14183.3	13095.5	13194.3	18756.7	14489.7	13093.7	17815.7	14197.7	10819	19639	22496	8426
AP+2+complex+subunit+beta+OS+Homo+sapiens+GN+AP2B1+PE+1+SV+1	105465	1181.33	14	AP2B1_HUMAN	67578.7	69666	70690	70194.3	73100.3	63365.3	69296	68087.7	69986	64320.3	32399	35212	31053.7	66843.7	66076	63558.7	67453.7	72029	69686	74050.7	71896.7	68474	69875.7	71029.7	29007.3	62844	66512	67452.3	71448	55576.7	74473	69168	66956	78619.7	73357.7	70735.7	68257.7	66121	69286.7	66240.7	53277.3	53997.3	50653.3	55260.3	54807.7
Adenine+phosphoribosyltransferase+OS+Homo+sapiens+GN+APRT+PE+1+SV+2	19778.9	3156.81	4	APT_HUMAN	17291	15803.5	14827.5	17337.7	17591	17024	17455.3	17243.3	16913.7	16130	13356	13525.7	14010.3	13999.7	12928.7	15030	12917	15984	15625.7	16222.7	15604.3	14511.7	15560.3	17984	23134.3	21936.5	15584.3	24127.3	24543.3	22795.7	19097	19484	20514	21447.7	23661	15738.3	15594.7	16130.5	17904.3	12046	11920	15750.7	10741.3	13018.5	16979.7
Actin+related+protein+2+3+complex+subunit+1B+OS+Homo+sapiens+GN+ARPC1B+PE+1+SV+3	41748.2	1249.34	3	ARC1B_HUMAN	39084.7	35511.7	37804.7	36499.3	33185.3	36356	41759.7	38296.3	37947	39860.7	30671.7	36753.7	33102	32003.7	34911	37017	40312.3	37603	40333	35199.7	18205.3	18268.3	19355.3	25302	26219.7	22963.7	24771.7	20530	24456.3	18518.7	35870	44066.5	35051.3	32372.7	34177.3	33860.3	33805.3	34893	37046	20319	24366.3	25039.7	26965.7	25444.3	25217.7
ADP+ribosylation+factor+1+OS+Homo+sapiens+GN+ARF1+PE+1+SV+2	20753.8	14664.4	7	ARF1_HUMAN	34859	35689.7	37934.7	35990.3	36407.2	36298.4	38254.5	37559.6	36446.3	28086.4	34364.3	33558.3	32990.9	33442.1	35239.6	43833.7	44825.3	43904.6	44010.6	42798.8	29919	32537	33670.5	31642.2	31264	58767.4	57530.2	60729.8	65232.6	61536.5	53116.3	49414.9	46531.9	52922.1	49932.9	63768	57876.8	59719.1	53573.7	54495.5	61651.7	64258.4	68072.2	60090.4	64693.7
ADP+ribosylation+factor+3+OS+Homo+sapiens+GN+ARF3+PE+1+SV+2	20657.8	10214.8	7	ARF3_HUMAN	23077.9	23627.9	25114.2	23826.9	24102.9	16268.4	17145.1	16833.7	16334.7	12587.9	15654.7	15287.5	15029.1	15234.6	16053.4	19358.9	19796.8	19390.3	19437	18901.9	59838.1	65074	67341	63284.4	62528	23367.8	22909	24183.1	25976.2	24504.3	19837.1	18454.8	17378.1	19764.6	18648.2	28843	26245.1	27011.7	23933.9	25782.5	26381.7	27497.2	29129.2	25713.6	27683.4
ADP+ribosylation+factor+4+OS+Homo+sapiens+GN+ARF4+PE+1+SV+3	20624.9	14549.4	10	ARF4_HUMAN	53299.7	55148.1	54568.2	57288.6	50976.6	44279.7	40020.2	42689.6	38794.8	41639.3	42166.2	46508.7	45002.6	45397.7	46909.3	53961.1	61430.6	60407.3	66115.7	53801.1	35118.6	23009.8	35768.6	20429.8	33458	33136.7	23625.3	22028.8	23879	23163.5	56990.7	59770.7	49872.5	57817.3	55975.7	41195.9	50869	46287.7	50796	48550	31267.6	34447.9	35056.5	34737.7	35715.9
ADP+ribosylation+factor+5+OS+Homo+sapiens+GN+ARF5+PE+1+SV+2	20643.8	6895.54	5	ARF5_HUMAN	24127.7	27835.7	23814.2	23992.9	35696.7	21214.2	22481.8	24796.8	23118.7	25356	16257.8	27934.1	31436.1	27681.2	30980.3	34665	37279.9	36005.5	37073	37784.6	36358.6	39522	41666.8	43036.6	30458.6	30370.3	30246.5	31914.3	32899	31916	29738	30592	28663	17304.3	36407	21503.3	20789.9	21737.2	18816.7	23520.7	18308.3	18364.9	23787.3	18448.3	26007.7
Actin+related+protein+2+OS+Homo+sapiens+GN+ACTR2+PE+1+SV+1	45046	2536.41	11	ARP2_HUMAN	52845.3	57133	62952.3	61950	60965	57010.7	63964.7	56758	49798	45387.3	47494	36438.3	49148.7	46712.7	43735.7	55783.3	60805.7	60461.7	48094	60504.3	52880.7	45622.3	41581	43988.3	49245.3	45409.3	51544.3	49954.3	62344	46450.7	54020	59884.3	59095	52971	59255.3	53606	55337.3	52519	55516	55418.7	41480	52020.3	45122.7	43286	45202.7
Actin+related+protein+3B+OS+Homo+sapiens+GN+ACTR3B+PE+1+SV+1	48121	1101.5	6	ARP3B_HUMAN	2508.27	3345.76	5567.73	6490.47	14795.9	2256.31	2584.94	2740.45	5690.35	7143.21	3959.54	4135.94	1774.83	1559.23	4711.36	1649.41	5793.64	5268.2	5449.47	5086.12	19930	10997	15384.7	8964.88	9378.2	9864.3	16487.2	11553.6	17853.1	19276.7	6407.67	12047.6	8010.16	11412.4	2707.54	8654.12	15544.6	15920.9	14438.9	8570.33	6831.23	9283.86	7455.13	8440.93	8129.28
Actin+related+protein+3+OS+Homo+sapiens+GN+ACTR3+PE+1+SV+3	47827.5	7171.06	19	ARP3_HUMAN	134087	139689	137677	143705	152510	145639	143697	147703	147258	161868	126932	135806	131819	128982	140239	124033	124627	129523	138968	148374	70854.7	66171.3	65006	70287	66775.3	68372.3	74002.7	76650.3	68683.3	76219	130942	152593	137123	141780	136770	125799	115889	130190	117131	116092	64796	63708	58357.3	63096	65855.3
Actin+related+protein+2+3+complex+subunit+2+OS+Homo+sapiens+GN+ARPC2+PE+1+SV+1	34447.1	4599.28	7	ARPC2_HUMAN	44613.7	42216	43188.3	47137.3	40826	43848.7	45492	47767.3	51370	47361	43298.7	41879	46804.3	43100	43199.7	47470.7	48921.7	41483.7	44341.3	49026	35638.7	25527.7	24880.7	28560.3	30308.3	27572.7	29003	15166.3	29099.3	28630	51699.7	45462.3	46073	45145.3	44398.7	42220.3	38143.7	41639.3	41868.7	43985.7	34782.7	31297	31030	31363.7	29224.3
Actin+related+protein+2+3+complex+subunit+4+OS+Homo+sapiens+GN+ARPC4+PE+1+SV+3	19781.1	2553.38	2	ARPC4_HUMAN	38335	42642	41183	41406	46366	44220	41806.5	46195	51560.5	45662	27606	36397	38342	42886.5	43197	42810.5	41922.5	45123	42679	41521	42721	86559	85879	87058	89339	45986	78931	81002	78001	77983	47809	39099.5	46658		43693		6845	8239	7203	5438	12260
Argininosuccinate+synthase+OS+Homo+sapiens+GN+ASS1+PE+1+SV+2	46815.6	1422.08	4	ASSY_HUMAN	33385	33578	35556	34493	23902.5	27274.5	26842	24024.3	27389	24196	43158	33567.7	32845	33406.7	34223.3	33303	32991	36032	32283	28511	11325.5		10275	8852.5	3700	19620.5	21693.5	17480.5	18932.5	15427	24810.3	33385	18790	32554	25559.5	27190	22959.5	23836.5	21579.5	22066	13838.5	16223.5	16877	17810	15484
Sarcoplasmic+endoplasmic+reticulum+calcium+ATPase+2+OS+Homo+sapiens+GN+ATP2A2+PE+1+SV+1	116411	577.32	8	AT2A2_HUMAN	40983.7	49888	37056.3	30114.7	37784.3	26210	57348.7	58458.7	38895.3	39513.7	24528.7	41574.7	44387.7	25165	44771.7	23719.3	54947	53005	54508	35523.7	30213.7	39679	19885.3	19938	28793.3	27177.7	32658.3	31216	26883	30476	34063.3	38399.7	35241.7	37167	37950.7	30907.3	33886.3	41657	43590.3	35947.3	33675	35549.3	37756.7	32437	35336.3
ATP+synthase+subunit+alpha+mitochondrial+OS+Homo+sapiens+GN+ATP5A1+PE+1+SV+1	59864.8	15595	27	ATPA_HUMAN	77117.7	71639.3	78854.7	80277.7	76065	72695.7	75240	75832.7	89107	81540.3	77077.7	73407.7	73198.7	73994.7	73151	80101	77624.3	86548	80639	86016.3	162497	156654	157582	156658	157322	166013	163629	164025	171629	171824	84936.3	84101.7	79633.3	81143.7	73302.3	132026	130029	134004	132478	130429	171024	158330	179752	177274	175596
ATP+synthase+subunit+beta+mitochondrial+OS+Homo+sapiens+GN+ATP5B+PE+1+SV+3	56560	16865.1	26	ATPB_HUMAN	106765	100510	97773	96425.7	103596	110046	103703	106926	107138	110659	93489.3	97326.7	101257	99040.3	96597	104456	95062.3	101388	98932.3	98545	203371	183251	194765	202024	192616	221520	233310	230601	238263	231817	110757	102835	112729	110141	103023	151124	173767	176175	168828	172792	171130	194694	191184	193814	173163
ATP+synthase+subunit+O+mitochondrial+OS+Homo+sapiens+GN+ATP5O+PE+1+SV+1	23391.4	2311.04	2	ATPO_HUMAN	16868	24307.5	19833.5	17325	31969	23427.5	21432	21291	22312	31708.5	17616.5		17097	13759	14876.5	18045	17808	19496	17815	11085	45362.5	50313.5	47547.5	51686	42137	40314	31064	46439	42605	47192	36265		21622	24425	17155.5	28859	35411	34840	3116		45692.3	62400	28698	67378	68907
Putative+annexin+A2+like+protein+OS+Homo+sapiens+GN+ANXA2P2+PE+5+SV+2	38830.2	27984.6	22	AXA2L_HUMAN	38905.7	38705.3	38204.8	36712.5	40790.6	316427	311692	303484	301576	364518	26823.6	26003.3	29164	28364.3	25148.7	338556	327150	339460	323298	332365	31231.6	27892.4	32352.5	34208.5	35915.8	24793.3	27353.9	24500.6	23996.5	23524.4	35482.6	34632	40027.5	40125.7	36108.4	31721.9	32805.4	35871.8	34302.9	34794.6	39775.5	40099	40572.3	41273.7	41212.5
Brain+acid+soluble+protein+1+OS+Homo+sapiens+GN+BASP1+PE+1+SV+2	22693.4	1792.35	3	BASP1_HUMAN	32488.3	29018	30856	29892	32420.3	30239.7	28075.5	28427	28472.7	29286.5	19910.3	27346.3	28313.3	25776.3	25128.5	31447	31164	32054.3	28828.7	30633	35506.3	37033.7	35088	34925.3	36297.7	33235.3	35583.7	35507	33785.3	34265	31376.3	31921	33362.3	32910.3	32111	30040	35584	30680	32510.3	32738	29139	27967.3	27484.7	26299.7	28149.3
Transcription+factor+BTF3+OS+Homo+sapiens+GN+BTF3+PE+1+SV+1	22225	3851.56	5	BTF3_HUMAN	27401.3	27280.7	41591.7	38903.3	41108	27500.7	41090.3	25907	36200	38220.7	17599	17165	25474.7	17104.3	24120.3	43856.3	39329.3	38910	39414.3	36584.3	61917.7	59602.7	57873.7	58487.3	59005.3	31249	31390	28848.3	33069.7	28636.7	41005.7	41288.7	40733.3	42388.7	40020.3	47182.7	51855	47814.7	51392.7	47442	32298	29938.3	32760.7	32063.7	31752.7
Basic+leucine+zipper+and+W2+domain+containing+protein+1+OS+Homo+sapiens+GN+BZW1+PE+1+SV+1	48214.4	2526.27	3	BZW1_HUMAN	13884.7	15094.3	15098	14973.7	15328.7	13589.3	13932	14855.7	5493.33	16299	12552	9396	9608.67	10133.3	22393	13437.7	15160.7	14260.3	14539	14799.3	16397.5	32942	18007	37074	18223.5	7643	21406.5	19000	6968	16739	15628	15789.3	3848.5	16660.3	21503	9609.5	18393	8625	8373.67	16154.7	17372.5	17165	7109	18878	17312
Complement+component+1+Q+subcomponent+binding+protein+mitochondrial+OS+Homo+sapiens+GN+C1QBP+PE+1+S	31761.5	6136.11	3	C1QBP_HUMAN	22383	21440.5	15958.7	20969	3103	28315.5	20621	29755	20595	17958	21468.5	15298.7	20112	19281.5	14572	15997	23117	23091	18171	25772.5	42232.5	39320.5	38533	35194	35646	50877.7	51509.7	47847	46365.3	37457	26804.5	27653	27112.5	29117.5	22418.5	47015	48216.3	41763.3	49345	47627	17397	23452	15993.7	21987.5	18273.3
C+1+tetrahydrofolate+synthase+cytoplasmic+OS+Homo+sapiens+GN+MTHFD1+PE+1+SV+3	102244	876.233	14	C1TC_HUMAN	22215.7	18216.7	34037.7	23884.3	31524	26657	31626	26581.3	36081.3	33902	18939.7	18981.7	34330	27393	21777.3	29013.3	30621.3	34988	23796.3	33539.3	34107	34284	38012.3	33071.7	31003.3	25621.7	28124	27273.7	27737.3	24789.3	36931.3	38048.3	37084	36485	32732	28527.3	28186.3	30524	29616	32945.3	30405.7	34695.7	35016.7	48470.3	43629.7
Caldesmon+OS+Homo+sapiens+GN+CALD1+PE+1+SV+3	93288.2	4000.18	16	CALD1_HUMAN	95550	100181	100480	94814	99861.7	87617.7	94446.3	91438.7	94575.7	97708.7	89598.7	92904.3	100026	88997.7	100747	92868	100658	98945.3	96718.7	100552	41233.3	41024.3	37226.7	38880.3	42914.3	18072.7	13640.7	14905.7	13462.7	17489.7	98769.3	98374.3	97457	97142.3	94964.3	49394	42333.7	43888.7	41962.7	40432.7	21087.7	19066	18663.3	14389.3	19486
Calmodulin+OS+Homo+sapiens+GN+CALM1+PE+1+SV+2	16837.7	29274.8	7	CALM_HUMAN	127079	124573	127900	81460	134705	147585	138451	145780	145857	149202	118870	126253	126230	117831	129098	135574	138433	139361	143234	141196	106964	84452.7	84336	106760	111844	61282	64605	57347.3	56168	74335.7	142073	135500	137614	116450	149470	121544	64786.7	117142	118542	119384	51768.3	52340	49758.7	49318.7	50952.7
Calreticulin+OS+Homo+sapiens+GN+CALR+PE+1+SV+1	48312.7	20828.9	16	CALR_HUMAN	268326	256066	283461	240690	220139	324273	294649	305438	290388	297683	292349	278945	302304	319029	294480	240331	250233	259380	254425	250494	289117	281904	293443	264293	298202	337926	327719	311663	321040	296474	270504	260203	223654	250295	233614	349039	352754	330341	327271	336838	222301	271969	251161	273767	240807
Calumenin+OS+Homo+sapiens+GN+CALU+PE+1+SV+2	37220.9	4813.06	13	CALU_HUMAN	98930.7	90228	95342	102365	78212	100737	105392	107022	108130	109266	99080.3	111350	110905	102171	106211	85291	91256	84894	88109.3	82861.3	98370.7	104277	83668.7	100253	122905	107172	112520	108589	103982	89614	94283.7	96219.3	97754.3	100329	99055	78539.7	76645	60742.7	94668.7	78067	58180.3	54873.3	69565.3	101849	66388.3
Calnexin+OS+Homo+sapiens+GN+CANX+PE+1+SV+2	68024.6	4993.47	16	CALX_HUMAN	63166.3	62077	68656	64803.3	59623	75868.3	62087.3	67618.7	64127.7	61896.7	67416.3	60006.7	58695.3	61038	60787.7	65743.7	68833.3	68028.3	75918.3	65737	95356	89823.3	92948	92091.7	86894	91359	86244.7	84946.3	82002.3	70391.3	57458.3	57307.7	57724.3	56036	69446	97237.7	95156	94753.3	96065.3	95685	113673	114781	115322	116931	118427
Calpain+2+catalytic+subunit+OS+Homo+sapiens+GN+CAPN2+PE+1+SV+6	80850.9	914.264	5	CAN2_HUMAN	38124.3	38255	40887	23758.7	41096.7	40143	41906.3	43144.7	40074.7	37637.3	19281.3	27999.3	32020	33202.3	35240.3	34656	36394.3	36332	37282.3	35936.7	25821	28532.7	28191.7	28445.3	26695	18300.3	18936.7	13539	15101	19741.3	32708.3	40132.7	40723	37147.7	40468	31424.3	32855	28934	30510.3	30779	21161.3	21597.7	22136	18108.7	15539
Cullin+associated+NEDD8+dissociated+protein+1+OS+Homo+sapiens+GN+CAND1+PE+1+SV+2	138087	2659.61	26	CAND1_HUMAN	34101.3	32975.3	40508.7	41365.3	38829.3	31016.7	30578	29394.3	36235	43269	24560.3	26761	25639.3	26544	31581.3	32406.3	31472.3	30195	28965.7	35682.7	37339	36089	34329.7	30768.7	32720	42733	33793	40025	30918	42815	46927	36404.7	40523	45422.7	36836.3	39753	33249.3	38620.7	35327	37159	45939	55536.7	40372.3	36718.3	42760.3
Adenylyl+cyclase+associated+protein+1+OS+Homo+sapiens+GN+CAP1+PE+1+SV+5	52357.8	7838.54	15	CAP1_HUMAN	83311.7	84693.7	82548	80178	88621.3	80219	85273.3	83779.7	79873.7	87144.7	77445.3	72898.7	86032	84308.7	81788.7	81002.7	84751.7	83808.3	84365	85503.3	81062	82443.3	82092.3	84770.3	83222.7	68556.7	68932.7	70902.7	71910	59881.3	87155	87494.3	79282.3	90019	82719	73748.3	76816	75352.3	71627.7	79670.3	71294.7	76862.7	74355.3	76696	77204
F+actin+capping+protein+subunit+beta+OS+Homo+sapiens+GN+CAPZB+PE+1+SV+4	31635.7	9972.68	5	CAPZB_HUMAN	44009	50987.3	41485.3	38070	48005.7	45430.7	50102.7	41093.7	48029.7	50743.3	40414.7	44731	36533.3	37099	44426.7	47377.3	53369	43666.3	43171.3	46438	51146.7	51156.3	45123.7	42717	41635	47408.7	45828.7	49955	47075	36711	54501.7	47949	50009.3	49368.7	56227.7	45734.7	41958	41511	42498.3	44380.3	33644.3	33436	27759.3	28209.3	30455
Cathepsin+B+OS+Homo+sapiens+GN+CTSB+PE+1+SV+3	38791.1	6775.79	6	CATB_HUMAN	62746.3	70202	67745.3	62086.3	43838.7	41608.3	68294.7	59358.3	59932.7	63949.3	49569.7	62587.3	58424.3	54810.7	66141	63275	70020	72772.3	67169	70875.3	66589.7	62082	74904	55655.7	60984.5	18878.7	73860.7	24006.5	71174.7	58930.3	64697	72482.7	72345.7	69416	37598.3	66960.3	61853.3	63372.7	59282	60045	25488	14345	22899.5	26027	17366.7
Cathepsin+D+OS+Homo+sapiens+GN+CTSD+PE+1+SV+1	45065.5	2235.76	6	CATD_HUMAN	28649	31774.3	33472.7	32161.7	35220	28727	29281.3	25057	30511	30615.7	25539.3	35125.7	32324.7	26399.5	36638.7	33829	25267.3	33634.7	35665	34649.3	65475.7	65577	68875.7	69270.3	62833.7	28049.3	28326.3	18606.3	19354	26773	34740.7	34617.7	37050	27696	36020	46630.7	50756.7	44285.7	52928.3	45696.3	31422.7	23891.7	25556.7	24561.3	23551.7
Caveolin+1+OS+Homo+sapiens+GN+CAV1+PE+1+SV+4	20642.7	4925.36	4	CAV1_HUMAN	83728.7	83200	84819	50790	74654.3	88031	90077.3	90143.7	90561.3	91117.7	92917.3	94309.7	51307.3	97071.3	99894	90356	95371	98128.3	97951.3	98556.7	68727	83080.7	53355.7	51595	41836	19434.3	22275.7	23537.3	23089	23770.7	87981	85590	90666.3	88265.3	79350	35742	34313	33748	33772	27159.3	17907	12266	17276	14553	13670.3
F+actin+capping+protein+subunit+alpha+1+OS+Homo+sapiens+GN+CAPZA1+PE+1+SV+3	33093.9	4133.89	8	CAZA1_HUMAN	64164.8	70209	69528.8	69441.1	73714.8	65661	63803	62470.8	62338	57163.4	80865.5	65865.8	64641.9	66008.3	70672	72057.2	73253.5	77091.6	72746	68476.6	61841.3	65134	55286.4	60532.9	80730.8	58884.3	63125.3	55644.5	49995.5	58768.5	68211.3	72163.7	68110.7	65078.4	66369.5	67697.1	72745.9	65642.7	69995	73337.8	54306.5	47543.7	49780.6	46465.8	53324.1
F+actin+capping+protein+subunit+alpha+2+OS+Homo+sapiens+GN+CAPZA2+PE+1+SV+3	33177.2	2321.81	5	CAZA2_HUMAN	29910.9	43634	42455.2	34374.5	39069.8	44175.3	45511	45820.6	50205.7	50352.3	35560.5	28695.2	29831.8	27837.7	39997.7	37103.5	37882.2	49913.7	50105.6	48749.7	37609.7	41673.4	52211.6	33136.5	66705.5	48480.7	32243.4	33338.9	37116.5	29618.5	57466	43338.3	56928.9	52461.6	56390.8	41335.9	59844.4	38860.3	40542.7	42774.5	40532.2	29549.7	31663.7	28634.9	37438.2
Carbonyl+reductase+NADPH+1+OS+Homo+sapiens+GN+CBR1+PE+1+SV+3	30660.1	3065.5	4	CBR1_HUMAN	29884.5	29756.5	19840.5	28301.7	32605	15235.3	18705	12457	29859.7	29798	9155.5	7514	17903	14696	22506	14559	21206		26823.7	30515.7	55643.3	56431	57346.3	58787.7	60065	50646.7	56982	61306.7	64540.3	56819.7	30948	29390	32839	37532.7	35232.7	44933.7	42660	40781.3	46656.3	38788.7	39893	45000.7	40285.7	39015	43597.3
Chromobox+protein+homolog+3+OS+Homo+sapiens+GN+CBX3+PE+1+SV+4	20982.5	2329.32	2	CBX3_HUMAN	27388	33463	31713.5	31847.5	49347	39296.5	37650	35850.5	33395.5	52928	16225	20273	23326	22844	27134.5	32954	32819.5	34467	32012	32158	48332.5	50801	45797	50827.5	77113	38391	33249.5	32268.5	33498.5	33462.5	33734.5	42579	36219.5	56536	39541	43395	58752	45447	45537.5	45021	31994	34405	34838	20882	21277.5
Coiled+coil+domain+containing+protein+47+OS+Homo+sapiens+GN+CCDC47+PE+1+SV+1	56159.1	1307.47	3	CCD47_HUMAN	10500	9755.67	10728	11150	9904.5	11223	10086	11780	10663	11356	7021.67	8146.5	8714	9749	8295	10538	11077	11054.7	10819	9723	15542.7	15581.3	15007.7	15938	14573	17864.5	18550	17874	3316	16633.3	12476.7	11677	13728.7	13099.3	13103.3	12504.3	16316.7	17180	16658	15576.5	15431.7	15677.5	16243.5	16233.5	15854.7
Coiled+coil+domain+containing+protein+57+OS+Homo+sapiens+GN+CCDC57+PE+2+SV+2	103452	1565.83	8	CCD57_HUMAN	41266.3	39191.7	40455.3	49712.3	60305.3	38251.4	51501	39158.7	42119.7	37373.7	33994.7	27383	32969.7	40098.7	27720.1	51673.7	41321	43416	29978.5	45326.3	38919.7	31835	37939.7	40138.3	40798.7	35185	32979.3	36005.3	32306.4	28862.3	43586.3	48441	49296.7	43977.3	53826.5	56127	51089.7	61891	63912.3	62518	68709.7	71745	59088.7	59005	69727.7
CD44+antigen+OS+Homo+sapiens+GN+CD44+PE+1+SV+3	82051	1199.62	4	CD44_HUMAN	46752	49158.7	51544	51678	34675.7	58004.3	56278	56932	56898.7	56042	42982.3	33417.7	42347.7	47114	42941.7	50554.7	51087	49044.3	50584	51242	24876.3	30843.3	34598.3	24721	26646.7	14621.7	9866	29678	9629.5	14483	51391.7	52454.3	55331.3	53071.3	51068	37940.7	36081.7	34185.7	37458.7	34703.7	16971	19462	15906	13645.5	18819.3
CD59+glycoprotein+OS+Homo+sapiens+GN+CD59+PE+1+SV+1	14804.6	2741.13	3	CD59_HUMAN	32769.7	30743.7	32796.7	35630	43069.3	46042.3	46476	41295	46268.3	41266	24243.3	32834.5	28247	27866.7	29786	27922	29516	27907	28984.7	31364.3	35097	41101	31342	33312	34315	26967	28656	22549	22540	24958.5	37778.7	40853.3	39210.3	39328.7	42348.7	35378.3	31320	34586.3	36227.7	35857.3	21527	18248	21787	21960	23607
Cell+division+control+protein+42+homolog+OS+Homo+sapiens+GN+CDC42+PE+1+SV+2	21600.8	2136.49	5	CDC42_HUMAN	29538.3	29324.9	39998.3	28994.7	44205.3	39708.3	37551	42537	38980.7	44177	29438.1	36930.7	37269.3	36070	29164.9	40057.7	40664	40469	40205	30548.5	42621.7	42182.3	48347.7	45655	49046	45773.7	43173	22450.3	47187.3	40014	41242	44479.3	27273.1	44564.7	45480.3	45557.7	27294.6	42947.3	27469.9	45788.3	39108	39442.8	22868.5	37119.2	16450
10+kDa+heat+shock+protein+mitochondrial+OS+Homo+sapiens+GN+HSPE1+PE+1+SV+2	10931.7	5887.65	3	CH10_HUMAN	23913.3	22192.3	24394.7	28935.3	31916	31093	21495	22968	28623.7	31525.7	22460	14491	18523.7	28773	23987	42700.5	25809.7	29708	29020.3	30666	81399	84028.5	85383	85447.5	82254	110288	112765	107418	113750	113834	33447.3	34900.7	36257.7	35669	31321.3	61767.7	68167.7	67203	65136.7	68748.3	62536.7	58653.7	59052	61239.3	59477.3
60+kDa+heat+shock+protein+mitochondrial+OS+Homo+sapiens+GN+HSPD1+PE+1+SV+2	61225.9	15109.9	29	CH60_HUMAN	92363	100247	103505	99079	93737.3	88090.7	94851.3	95436	97155	95349	74168	77816.7	77741.3	77158	89689	92494.7	100261	118523	101473	94354.3	223751	190518	223758	231685	192099	183109	242801	247981	248162	231118	102030	103408	99030	103867	98581.3	197517	187176	190448	192428	206083	206347	172840	181110	167677	218914
Citrate+synthase+mitochondrial+OS+Homo+sapiens+GN+CS+PE+1+SV+2	51940.7	3016.95	7	CISY_HUMAN	25100	24735.7	23505	23589.7	26098.7	26770.3	31789	24878.3	29842	24207.7	6813	7275.5	13188	13897	20493	22953	17080	11323.3	20527.3	17228	24166.7	58364	57319.7	56668.7	59534	48569.7	52790.7	55548	55023	53214	24430.3	24803.3	23974.3	26979.7	25441.7	45796.3	46404.3	53645.3	55056	43981.3	59588	58419.3	67234.3	66982.7	64331.7
Cytoskeleton+associated+protein+4+OS+Homo+sapiens+GN+CKAP4+PE+1+SV+2	66136.6	7764.73	28	CKAP4_HUMAN	125421	128457	126418	125864	123686	124676	128951	117191	117019	121814	133997	137775	131427	117938	122386	135070	130136	128949	123944	126450	109725	111889	114156	109469	108110	87314.7	77418.3	76720.3	79471	76611.7	128896	135071	130238	135011	128879	92806.3	96237.7	98118.7	99212.7	94391.3	70064.7	71745.3	67706.3	77417.3	70880
Clathrin+heavy+chain+1+OS+Homo+sapiens+GN+CLTC+PE+1+SV+5	193383	4983.66	62	CLH1_HUMAN	124004	115354	119532	97599.7	107671	124816	123699	119773	109839	114290	102372	102097	117471	113471	89428.7	104284	122691	105766	106975	101359	131915	144098	134403	139931	136581	164592	166390	166963	165161	149864	103692	116128	117620	122464	107063	176936	174863	174572	182805	165909	216530	220486	225591	240071	222256
Clathrin+heavy+chain+2+OS+Homo+sapiens+GN+CLTCL1+PE+1+SV+2	189140	1406.71	22	CLH2_HUMAN	29837.7	24623.3	22155	17307.7	14832	22573.7	21962	26208.7	22495.7	15207.7	23010.3	27742.7	26689	39640.3	24634	22665.3	19137	18116	23101	16735.3	33804.7	18383.7	15729.3	27724.3	20646.3	19720.9	24294	17634.9	19292.8	13041.1	20183	21881	15012	16140.7	13994.3	27079.3	29897.3	32609.7	39812.7	21084.3	24565	32602.5	17178	32191.5	37922
Chloride+intracellular+channel+protein+1+OS+Homo+sapiens+GN+CLIC1+PE+1+SV+4	27264.9	7131.26	9	CLIC1_HUMAN	78737	82099.3	82876.3	89969	82854.7	83296.3	91871.7	93642.7	96298.7	94661	74625	67081	67419.7	66030.7	74670.7	76618.7	78402	83079.7	86584	87822.3	84448.3	77358	78055.3	79900	77406.3	85595.7	85968.7	84430.3	85856.7	81171.3	94928	82216	86177.3	83114.3	79445.3	91847.7	86897.3	92978.7	89518.3	86945	78992	82806.3	78174.3	75650.3	72674
Chloride+intracellular+channel+protein+4+OS+Homo+sapiens+GN+CLIC4+PE+1+SV+4	29000.3	4864.86	7	CLIC4_HUMAN	60589.7	56847.3	56750.7	56600.3	57128.7	68672.3	65445	63000	68168.7	64088	53039	46459.3	53346	50585.7	53976.3	52743	61000.7	58048	56980.3	62393.7	29631.7	34746	33912.3	30512	30416	29013.7	24153.7	22451.3	22602.7	28221.3	55391	53698.7	56973.7	53234.3	52691.7	46630.3	47237	48027.7	45608.7	45504	37115.5	34034.3	37672.7	36239	24898
Calponin+2+OS+Homo+sapiens+GN+CNN2+PE+1+SV+4	34096.3	4531.51	10	CNN2_HUMAN	103813	66304.7	90340.7	92239.3	70244.7	46946.7	69471	80171.7	87216.7	65232	96783	97382	98507.3	82560.3	83816	101751	70396.3	85485.7	92040.7	93862.3	24097	25126.7	28638	22064	26528.7	18630.7	15857	21759	7971.33	7773.67	92677	93083	89248.3	94879.3	77909.3	32455.7	25058.7	22643	24705.3	30679.7	16626	17505.7	14705.3	16332	16384
Calponin+3+OS+Homo+sapiens+GN+CNN3+PE+1+SV+1	36584.9	2146.98	7	CNN3_HUMAN	39851	59774.7	46744	44051.3	38112.7	45215.7	55998	55219	43398.3	48448.7	35827.7	38725.3	38081.3	39469	38280.7	42674.3	54702.7	49408.7	50203.7	42899.7	27613.7	35360.3	41164.7	31826.7	35396.3	22999	22840	30207.7	34973.7	22161.3	50338	43209.7	44833.3	38578.3	41449	36990.3	42520	42805.3	36817.3	41937.7	12667.7	16934.7	9809.67	17967	18691
Collagen+alpha+1+I+chain+OS+Homo+sapiens+GN+COL1A1+PE+1+SV+5	139968	8949.83	41	CO1A1_HUMAN	106592	106553	104071	105585	101575	125662	120497	123836	126028	120432	148808	165878	163302	160665	169957	86919	90385.7	90544.7	85303	93576.3	18230.7	21678.7	20255	21845.7	16782.3	39236.3	19158	22029.3	30950	18901	88867.3	87329.3	91509.3	86430.3	91280.3	24683	22381	21180.7	19247	21418	14925.3	18228.3	16795.7	15555.3	19261.3
Collagen+alpha+2+I+chain+OS+Homo+sapiens+GN+COL1A2+PE+1+SV+7	129827	1888.53	27	CO1A2_HUMAN	72638	54767	53665	52997.7	54145	69980	72872	72334.3	68558.7	70596	91789.7	93939	85458.3	84568	87116.3	46134	48742.3	48622.3	46830	65118.3	19189.7	20337.3	23250.7	15824.7	16970	22351.7	24980.3	25885.7	24804.7	25183.7	59616	63261	55488.7	51555.7	48094	31000	22263	28075.7	24904.3	27381.7	18267.3	16115.7	15615.7	18493.7	22767.3
Collagen+alpha+1+VI+chain+OS+Homo+sapiens+GN+COL6A1+PE+1+SV+3	109670	2617.91	17	CO6A1_HUMAN	62822	61904.3	67369.3	69104.7	65554	55817	57442.7	60489	62214.7	57703.7	65502	58281.7	58214.3	64287.3	65245.7	58875.7	58029.7	57859.7	57981.3	59020.7	22791	18410.7	20911.3	21195.7	15427.3	14966.7	14432	15336.7	16448	14032.3	67221	66124	70004.3	69038.3	58932.3	26139.3	31922.7	12687	26902	29151.3	13095.7	12604.3	14804	14245.7	14524.3
Collagen+alpha+3+VI+chain+OS+Homo+sapiens+GN+COL6A3+PE+1+SV+5	345381	3324.82	86	CO6A3_HUMAN	74622.7	79875.7	76008	79440	73965.3	69101.3	62179	68672.7	67482	64223	59432	62371	61397.7	58709.3	58637	74727.3	77279.7	77121.3	73142	77258.7	63206.3	64741	63579.7	66042.7	62267.7	85704.3	90664	89147.3	67856.3	87390.7	81914	80095	81369.7	84397.7	77837.3	74156.7	81184.7	63253	61619.7	85437.3	66207.7	60906	66243	65566.3	66246.3
Collagen+alpha+1+XII+chain+OS+Homo+sapiens+GN+COL12A1+PE+1+SV+2	334345	1665.55	36	COCA1_HUMAN	20225.3	21530.3	21763.3	25070.7	22794.7	34181.3	31599.3	33864.3	34808	34155.3	135733	56857.7	49159	52165.3	54191	21042.7	23751	21960.7	21870.3	23889.7	33992	19111.3	17629.3	28235.3	27749.3	27753.7	29783.3	25850	30830.7	26919.7	24331	30913.7	30664.3	27801.7	27266.7	18471.7	23659	42652	43756.3	25683	25414.3	22029	25486	31049.7	34069.3
Cofilin+1+OS+Homo+sapiens+GN+CFL1+PE+1+SV+3	18730.6	40158.2	13	COF1_HUMAN	416979	431853	415733	425521	403785	446032	424591	433914	430278	408616	402600	410822	402599	404098	407616	376514	414359	417865	406040	395112	366500	363780	365256	358199	349803	338443	334694	343996	340374	327962	432944	418004	425197	410270	409204	383057	354757	375851	297010	377215	263889	274482	274030	269683	272421
Cofilin+2+OS+Homo+sapiens+GN+CFL2+PE+1+SV+1	18850.7	12547.1	9	COF2_HUMAN	32962.2	24968.5	25787.2	25722.8	31630.4	22628.1	29167.4	29687.8	34189.7	22601.7	22399.1	18971.7	22097.7	19989	24638.3	31821.7	26708.2	27120.5	25197.5	27038.7	41511.2	43243.6	43979.7	40012.6	44696.3	31940.5	47128.4	32181.2	31607.8	32192.8	28490.8	31515.3	29855.7	26846	27745	30826.9	34360.3	29732	32782.3	32181.7	22571.2	23882.8	25430.3	21631.3	27584.3
Catechol+O+methyltransferase+OS+Homo+sapiens+GN+COMT+PE+1+SV+2	30493.3	2006.35	4	COMT_HUMAN	24546.7	25609.5	26324	26492	29089	25719	25237	25268	25908.5	24276	29574.7	35164.7	30384.7	28173	29156.3	27494.7	27093.3	28871.7	26724	27294.3	16833.7	23881	25077.5	23530	25617.5	20995	18707	20086	20828.3	24118	26729.7	27390	27174.3	29722.5	30552	17399.3	23922.5	23113	22852.3	16267	18529.5	11709	9769	17087	18999
Coatomer+subunit+alpha+OS+Homo+sapiens+GN+COPA+PE+1+SV+2	139886	1065.49	18	COPA_HUMAN	47070	50506	41440.7	43023.3	68668	43034.7	46306.7	44709	48133.7	42316.3	39127.7	35927	38862	51811.3	41083	45204	48966	44105	46333.3	45149	35140.7	36811	43623	46281.3	58314.7	41975.3	46716.7	38873.3	38390.3	48980.7	46747	40645.7	41187	43374	52178.7	34154.3	38947	40234.7	42083	48334.3	44423.7	45098.7	44143.7	43692.7	49490.3
Coatomer+subunit+beta+OS+Homo+sapiens+GN+COPB2+PE+1+SV+2	103343	923.721	13	COPB2_HUMAN	36727	31008.3	36317	30004.3	30168.7	32244.3	36678.7	40055.3	38654.3	35972.3	22744	26958	38742	21608	27371.3	29310.7	32746.3	35378.3	35654.7	36611.7	23508	24488.7	30518.3	31129.3	33443	28945	25009.3	30478	26735.7	20004.7	37159	33511	34933.3	33279	35884.7	28262.7	34199	35499	21580.3	37941.3	25667.3	30584	28332	31643	31483.3
Coatomer+subunit+beta+OS+Homo+sapiens+GN+COPB1+PE+1+SV+3	108283	927.136	11	COPB_HUMAN	56272.7	53826.3	38302.3	36177	54945.7	51880.7	35071.7	33499.7	35231	48975	40074.3	39949.3	40736	40199	34064.3	51172.3	33646	40442.3	34473.3	52285	28364	42285.7	50375.7	50054.3	47587.7	46783.3	46813.3	49023.3	60526	46500.3	52568	54628.3	44032.3	41384.3	39725	37201.3	54822	31817	58537	30408.7	37332.3	52029.7	49827.7	47121	47760.7
Coatomer+subunit+epsilon+OS+Homo+sapiens+GN+COPE+PE+1+SV+3	34710.2	1848.57	3	COPE_HUMAN	15818.5	16193	17067	8629.33	18895.7	16188.3	17275.7	16827	16841.3	19403.3	12028	9388	7981	13341.7	20096	12354	11069	16663.7	14913.3	16973.7	19304.7	6717.5	13950	17656.3	17538.5	16031.7	13632	15949.3	18690.5	16762	22902	25024	20673.3	18369.7	18950.7	21465	21752.3	22841.7	23031	21572	13037	17891.5	16494.7	17025.5	9643
Coatomer+subunit+gamma+2+OS+Homo+sapiens+GN+COPG2+PE+1+SV+1	98763.1	498.011	4	COPG2_HUMAN	14958.3	13504.5	11346.2	13365.2	12455.9	12750.3	6750.77	9521.71	16125	11595.4	11520.4	11184.4	17293.2	14469	12122.6	17134.5	11455.2	18181.4	14142	17974.1	10390.9	14538.1	15077.8	12708.4	17066.4	15479.6	14159.4	15689.5	13273.1	9789.23	20898.6	22517.7	9015.57	9019.46	12728.8	15084.5	17022.7	12930.6	14032.2	8823.92	6828.89	9135.89	8352.53	10259.7	3755.48
Coatomer+subunit+gamma+OS+Homo+sapiens+GN+COPG+PE+1+SV+1	99030.1	1385.9	16	COPG_HUMAN	25484	27572	25669.7	23844.7	34722.3	24065	22040	21460.7	25555.3	33368.7	19656	22383.3	21393.7	20145.3	18788	24202.7	23820.7	31912	26667	31636.3	29564.3	25777	19643	20462	21539.3	22730	21520.3	18156	20606.3	18514.7	34338.7	28502.7	37258.7	31486	30244.7	33973	35590.3	28162.3	32033.7	27460	21319	27031.7	23036	24324.3	21325.7
Coronin+1C+OS+Homo+sapiens+GN+CORO1C+PE+1+SV+1	53933.5	2232.83	6	COR1C_HUMAN	49048	44033.7	35492.3	48241.7	36016.3	53595.3	56431.7	57519.7	65029.3	50315.3	61993	54183	55042	54215.3	58726.7	45106	55616.3	44931.7	45899.7	62705	29650.7	28047	28189.3	33207.5	32051.7	45559	57542.5	48855	55222	57414	52918	39335	38879.7	35109.3	39932.5	35774.3	40467.3	34123	36838.7	38377.7	45989	43159	40038.3	46215.7	42576.3
Coactosin+like+protein+OS+Homo+sapiens+GN+COTL1+PE+1+SV+3	16059.1	4405.91	2	COTL1_HUMAN	50239.5	47688.5	40410.5	42792	50136.5	53236	52362	45146	44436.5	54572.5	39642.5	40479	26388	41132.5	32741	47652.5	48507.5	43170	41655.5	47150	28216.5	15249	28510	27165	13217	30299.5	31542	29920.5	30623.5	13467	45603.5	50857.5	50925	50185	50386	29171.5	37847.5	29539.5	31125.5	33130	16937	15397.5	14626	15904.5	18411.5
Cytochrome+c+oxidase+subunit+2+OS+Homo+sapiens+GN+MT+CO2+PE+1+SV+1	25736.2	1414.99	2	COX2_HUMAN	16027	27948.5	25449	27314	26273	21037.5	25532	23574.5	26017.5	27782.5	26674	13097	22672.5	25316.5	15885.5	23163	25182.5	18952.5	18705	18701	54232.5	53974	56346	52253	55905.5	85529	79709.5	81333	81333	78016	24403	25688	25256.5	25150	26738.5	42081	18380.5	42515.5	41662.5	42099.5	76676.5	79910	74676.5	74415	74403.5
Copine+1+OS+Homo+sapiens+GN+CPNE1+PE+1+SV+1	59686.2	2836.57	2	CPNE1_HUMAN	21197.5	22649	21831	20503	22061.5	19472	21208	20816	19833	22649	19372	19161	19128.5	19193.5	18611	18719.5	20434	20219.5	20363.5	19376.5	26671.5	25330.5	25694.5	27036	26435	29637.5	30918.5	23174	29328.5	30342.5	24893	23237.5	25725.5	25211.5	24370.5	17654	22299	22031.5	21589.5	20253.5	22701	12939	24651.5	23247.5	25020
Calpain+small+subunit+1+OS+Homo+sapiens+GN+CAPNS1+PE+1+SV+1	28486.9	5852.4	10	CPNS1_HUMAN	58639.3	63001.3	58483	56662	46628.7	61131.7	58260	55196.7	56656.7	45570.3	57545.3	52111.3	52593.7	54122.3	55196.3	55876.3	59820	60632.3	45988	57929.3	23422.3	46396.3	28083.7	44644.3	32207	42254.3	43011	41257.7	33552	29918.7	63671.3	71603.7	70431.3	53172.7	53903.3	50140	48458	49140.3	48138.7	48350.7	35206	26047	30894.3	29550	29586.7
Cysteine+and+glycine+rich+protein+1+OS+Homo+sapiens+GN+CSRP1+PE+1+SV+3	21422.8	2700.36	4	CSRP1_HUMAN	80415.7	78957.3	78439.3	77495	81975.3	56644.7	65192.3	64545.3	65884.7	68615	59985	58498.7	59789	55571.3	62350.7	78354	77044.7	77275.3	74748.7	74108	45314	46778	49040.5	36509.7	58286	35883	36545.5	34512	36040	15674	83182.3	87553.7	90003	86745	82348.7	39511.7	40557	42780.7	40014	45579.7	12895.5	19560	15357.5	18942	14440
Catenin+alpha+1+OS+Homo+sapiens+GN+CTNNA1+PE+1+SV+1	100756	1012.01	9	CTNA1_HUMAN	19120.3	23172.3	36631	20527	21877.7	21864	26649.3	27621.7	25262.7	28201.7	19981.3	33168.7	27135	18607	23535	22625	17335	24812.3	21922.7	22885.3	21414.7	22270.3	11278	14943.7	15124.7	15702	12858.7	11763.7	11145.7	13888	26122.3	24099.3	26258.3	23564.3	24244.7	16283	25775.3	22739	24925.7	21083.3	16509.7	28988.7	20586	15140.3	23831
Protein+CutA+OS+Homo+sapiens+GN+CUTA+PE+1+SV+2	19230.4	5559.67	2	CUTA_HUMAN	32226.5	31471	37626.5	33889.5	22212	28885	38548.5	39073	41656	38728	28769.5	30622	28547	22557	31416.5	34817.5	35678.5	34347	35705.5	40098.5	38092.5	41425	39103.5	32353	25916	63581.5	64221	34212	64121	59979	41265.5	43476.5	44585	44830.5	27785	47033	47513	50076	49494.5	49642	29644.5	33087.5	31519.5	18694.5	28436
DNA+binding+protein+A+OS+Homo+sapiens+GN+CSDA+PE+1+SV+4	40090	1628.88	4	DBPA_HUMAN	9760.37	11785.6	9404.35	9432.02	8680.4	9415.24	9657.18	9183.56	8555.82	9754.98	7915.78	9035.32	8558.14	8326.21	9204.5	11403.4	10271.6	11468.9	11508.9	11185.9	10822.3	10079.6	10280.6	12402.5	13778.4	10763.2	14431.7	12177.3	13149.6	11368.1	9581.9	10542.8	10503.7	8880.08	14614.8	10526.2	8233.1	9599.98	8556.32	6649.83	13739.2	12281.9	11809.2	12012	10978
Probable+ATP+dependent+RNA+helicase+DDX17+OS+Homo+sapiens+GN+DDX17+PE+1+SV+1	72998.9	1807.14	13	DDX17_HUMAN	30124.6	29734.7	30905.4	32283.7	29462.3	30358.2	30835.3	30622.9	30740.9	28243.4	35997.8	34901.7	36650.9	29456.2	33916.2	22851.2	26679.1	32487.4	30464.5	32364.1	27026.1	29823.3	28608	28020.7	30391.4	30550.5	26487.9	31287.5	31944.1	33257	34366.5	31928.9	31101	34496.5	36853.6	38582.9	39880	35979.7	38641.8	39868.5	24156.3	22119.4	22351.2	20140.9	21041.4
ATP+dependent+RNA+helicase+DDX1+OS+Homo+sapiens+GN+DDX1+PE+1+SV+2	83401.7	1250.32	10	DDX1_HUMAN	24653.3	25714	23944	20064.3	25720	21848.3	21788.7	25142	24536.3	22256	18887.7	21137.7	21030.7	15553	19125.3	22368	20522.7	23265.3	24700	23191.3	29512.7	33780.7	34634.3	34124.3	36143	51276.7	51254.7	33017	49338.7	51502.3	24462.7	26659.7	26670.7	27111.3	25768.7	31901	31793.7	29041	30944.7	39327	34175	52200	46881.3	50480.3	41608.3
ATP+dependent+RNA+helicase+DDX3X+OS+Homo+sapiens+GN+DDX3X+PE+1+SV+3	73642.7	2601.17	15	DDX3X_HUMAN	21535	21885.6	25894.9	26770.1	23358.7	18126	18522.8	18509.8	13346	19179.8	14534.1	13555.5	13433.1	17021.1	18896.4	22499.5	22435.4	23653.4	23182.9	22523.2	54152.5	55319.3	48789	46887	54077.3	17912.7	18771.1	19671.4	20407.4	20162.9	21136.4	24028.6	21274.7	21706.7	20814.1	33237.1	39245.6	37174.8	37394.4	41975.3	25203	39098.6	25797.1	27404.8	40239.1
ATP+dependent+RNA+helicase+DDX3Y+OS+Homo+sapiens+GN+DDX3Y+PE+1+SV+2	73610	1244.87	15	DDX3Y_HUMAN	15010	12070.3	8863.39	11121.5	9002.67	16468.9	15985.8	15180.3	15584	25997.6	9035.55	12682.3	12544	12297.7	7723.62	9706.83	15685.9	13478.3	12060	18378.8	40548.5	23856.7	26041.3	32516.3	28490.4	23317.3	24179.6	21371.3	15485.4	24373.8	11458.3	14414.4	17461.6	20110.3	10347.6	18611.2	25354.1	31597.5	27431.6	24476.3	23394.6	21719.7	22416.6	21135.3	21544.9
Probable+ATP+dependent+RNA+helicase+DDX5+OS+Homo+sapiens+GN+DDX5+PE+1+SV+1	69661.4	1855.62	13	DDX5_HUMAN	25354.4	35332.3	33269	33052.3	28851.5	31652.4	31770.7	31298.9	26231.5	32463.3	13714.1	14948.8	16401.8	12793.8	22746	28740.8	30218	32276	32964	31204.2	41281.7	41483.9	41718.3	40571.6	42742.2	14844.5	13276.7	20968.9	21556.6	23190	28570.2	29429.7	33173	28400.1	31330.8	44669.7	45344.7	44725	50679.2	48314.2	33476.1	32984.8	32613.1	33948.7	37710.3
Desmin+OS+Homo+sapiens+GN+DES+PE+1+SV+3	53592.9	3921.18	8	DESM_HUMAN	22092.7	20760.3	14320.7	26249	15740.7	37338.7	24654.7	25647.7	52626.3	26600	16212.7	16991.3	20360	23222.7	19163.7	20579.7	24712	19124	16235	24928	13949.3	16219.7	17857	16704	13794	16849	12503	14049.3	19218.3	9275.36	27023.7	22636.3	21766.7	25612.7	23371.3	26141.7	14980.3	16803.7	14034.8	29659	19517	14363.7	14615	14880.7	22107
Destrin+OS+Homo+sapiens+GN+DSTN+PE+1+SV+3	18962	6606.42	6	DEST_HUMAN	55056.7	55452.7	51752.3	50955.3	35748	57353.3	59521	58081.7	53667.3	41506.3	45221.3	41387.3	47773.3	59499.7	52789.3	46967.7	55426.7	46726.3	53945.3	39064.3	23016	23538	22848.3	5863.18	20220.2	21650.5	31332.8	29125.9	45590	25301.8	38485.7	34644.7	36777.7	35877	33340.7	34132.5	31109.8	33260.7	26024.3	28731.9	11385.5	26584.3	27509.7	22738.1	24828.3
Glutamate+dehydrogenase+1+mitochondrial+OS+Homo+sapiens+GN+GLUD1+PE+1+SV+2	61740.1	838.473	2	DHE3_HUMAN	20067	19591.7	19318.3	19438.7	21977.5	18732.7	20119	19452	15750.7	23940	26660	23291	18562.7	17773.7	27720	22661	20702	20806.7	20700.7	23616.5	14175.3	21473	28423	20578.5	24005.5	30441	29582	18723.5	21341	20180	16799.5	29801	29616	29674	23829.5	21834.5	23587	22575	21748.5	21926.3	20798	17728	17777	19339	13994.7
ATP+dependent+RNA+helicase+A+OS+Homo+sapiens+GN+DHX9+PE+1+SV+4	142270	1904.29	28	DHX9_HUMAN	68611.7	56239.3	81004.7	70923.7	69681.7	72990.7	58832.3	73786.3	63070.7	64106	51061	53173	51670	64540.7	70190.7	68638.3	80159	82426	81736	74075.7	65418.3	65070.3	61568.3	61596.3	61997	53219	48811	52430.7	52926.7	51940.7	59805.3	54502.7	58498.3	65160	60156.3	53523	53815.7	65876.7	66617.7	54419	54704	54580	55611	55610	53805
DnaJ+homolog+subfamily+A+member+1+OS+Homo+sapiens+GN+DNAJA1+PE+1+SV+2	45609.6	1139.88	4	DNJA1_HUMAN	10774.3	11666	10878.7	11364.3	12337	4093	7005	14337	13623	11941					14263	12117.3	15840	15477.5	10260.7	16255.7	31896	33877.3	32675.7	35377.3	32702.7	19720	21369.3	17973	22149	21173	17561	13365.3	12588	4340	13227.5	37051.3	37208	38116.3	37998.7	35809	40598.3	42378	40830.7	43465.7	40934.3
Protein+dpy+30+homolog+OS+Homo+sapiens+GN+DPY30+PE+1+SV+1	11249.7	6351.28	2	DPY30_HUMAN	5096.5	6149.5	6397	7049.5	8222	6587	6429.5	6336	7292.5	7656.5	4329.5	4274.5	3866	4490	3242	5210	5673.5	5285	7359	8063	18986.5	19307	18675	18831.5	20764.5	17443	14125	14506	14676.5	15068	7562.5	7577.5	8284.5	8005.5	8457	12818	11961	11581.5	12209	8835	8345.5	9128.5	9733	8914.5	8894
Dihydropyrimidinase+related+protein+1+OS+Homo+sapiens+GN+CRMP1+PE+1+SV+1	62526.1	1076.76	3	DPYL1_HUMAN	3165.98	4435.45	3914.11	4903.9	3867.87	5113.14	5863.04	4764.42	5825.23	6205.45	1158	1286.55	2633.49	1278.6	3324.34	3474.36	3695.11	3510.39	3635.78	3507.86	1789.79	2357.73	2165.82	479.852	2283.63	2542.42	5444.52	7179.96	6584.6	2316.74	4989.87	4637.81	4586.43	4746.21	3795.94	10515.2	8968.57	9031.67	11744.2	8953.27	4505.78	4702.73	1060.29	2690.3	1046.54
Dihydropyrimidinase+related+protein+2+OS+Homo+sapiens+GN+DPYSL2+PE+1+SV+1	62749.9	11804.2	23	DPYL2_HUMAN	496166	512352	487847	483579	430802	426982	394187	425454	412162	361664	395756	403001	393655	396443	349047	430044	432205	424254	420731	375423	317267	311776	302870	302112	279275	204744	185903	181147	188786	156429	443605	400035	421266	396076	394197	362627	307402	338235	296434	266027	198664	196356	186613	185995	174399
Dihydropyrimidinase+related+protein+3+OS+Homo+sapiens+GN+DPYSL3+PE+1+SV+1	62362.6	1215.81	8	DPYL3_HUMAN	19829.7	7284.57	9496	15654.3	9355	2772.93	8121.67	7609.76	3673.33	9631.33	18369.7	18080	10924.3	12438.7	12259.3	9168.67	8550	8211.67	10218	8895.91	8734	6004.2	10580.3	8634.33	7484.33	4592.3	1518.3	7570	7007.33	5085.74	13051	10972.7	13991.3	13671.7	10986	11922.7	10382.7	10112.3	10307.3	8835	6066	8972	8000	8050.33	8924.33
Drebrin+OS+Homo+sapiens+GN+DBN1+PE+1+SV+4	71885.6	1705.02	4	DREB_HUMAN	22924.7	21824.3	23133	24349.7	25870.3	24937.3	26480.7	27167	27942.3	28747	22775	23482.7	22439.7	22864	22138.7	20221	22807	22177.7	20743	19429.7	23483	26572.5	23309.5	20284.5	28910	10641.5	11006.5	10593.5	9956	15226	23471	25617.3	27630.3	22042	26399	17691	20608.3	18823.3	19756.7	15309	7096.33	4599	3046.67	7198	4182.33
ATP+dependent+RNA+helicase+DDX39A+OS+Homo+sapiens+GN+DDX39A+PE+1+SV+2	49642.9	2957.13	8	DX39A_HUMAN	4359.24	5491.66	4912	4521.67	5607.45	7580.13	6860	6621.45	7193.78	7651.27	9561.02	11239.8	8548.95	8500.35	6168.55	6503.78	6692.88	4929.78	5684.67	7335	22710.6	24650.6	24636.9	23268.5	24357.1	27245.5	26804.8	26997.1	26945.6	26925.5	6211.77	6579.02	6592.9	5940.95	6833.47	21753.7	21160.7	21824.6	20665.7	20237.5	19131.9	19351	24099.2	12715.4	11953.7
Spliceosome+RNA+helicase+DDX39B+OS+Homo+sapiens+GN+DDX39B+PE+1+SV+1	49447.7	3316.95	12	DX39B_HUMAN	47165.3	43916.3	41599.7	52026.3	25484	56321.5	54395	53198.9	45628	37498.4	31215.8	38639.5	38415.4	42456.6	34113.9	44287.9	53165.8	51924.1	47641	57396.7	60229.4	66282.4	66408.4	60448.2	63494.9	67191.2	68911.2	69451.2	64111.4	64433.9	43139.9	50230.3	49032.2	39177.7	41436.6	47721.4	58807.2	52045.7	50342.6	57534.5	70588.1	71229	73577.8	70217.6	72091.3
Cytoplasmic+dynein+1+heavy+chain+1+OS+Homo+sapiens+GN+DYNC1H1+PE+1+SV+5	535146	845.998	68	DYHC1_HUMAN	42420.3	41599.3	43481	42971.3	49483.3	53572.7	56668.7	47465.3	43670.7	56812.7	34871	33635	36702	32694.3	63185.3	57122.7	40210	54803.7	52024.7	61957.3	60707	61901.3	66713	54771	53612.3	55186.7	47077.3	52994	48979	55702.7	56022.3	41008.3	55655.3	56875.3	54021.3	54435.7	53669.3	55323.7	57115	55519.3	66530.3	57962.3	61756	68061	77933.7
Dynein+light+chain+1+cytoplasmic+OS+Homo+sapiens+GN+DYNLL1+PE+1+SV+1	10537	1371.27	2	DYL1_HUMAN	43072.7	42835.5	44339	43148.5	54055	52646	49080.5	48401	46714.5	43870.5	34978.3	43263	27814	17427	26689.7	26890.7	41900	41676.5	41543	44326	57707	67630	46528	48270	54854	62365	61536	56541	56619	51626	50727.5	44608.5	38861.5	32374	50620	55458.5	58956	50345	51119	53843	47066.5	48128	41928.5	50726.5	39793.5
Trifunctional+enzyme+subunit+alpha+mitochondrial+OS+Homo+sapiens+GN+HADHA+PE+1+SV+2	83741.2	1769.37	18	ECHA_HUMAN	41483.7	36925	37522.3	30943.7	35133.3	39615.3	37868	36532	37723.7	38797	36094.7	41482	36468.7	36730.7	39922	40477.3	38564	42180	34495	36222.3	49071.7	45310.7	58153	53134.7	57785.7	56265.3	61546.3	60451.7	59623.7	58124.7	38851.7	37462	41352.3	36190.7	34727.3	45038.7	43368	43075.3	45177.3	49621.7	62205.7	51967.3	57840.3	60742.3	60031.3
Trifunctional+enzyme+subunit+beta+mitochondrial+OS+Homo+sapiens+GN+HADHB+PE+1+SV+3	51579.7	612.788	4	ECHB_HUMAN	29659.5	25211.7	21736	26549	30037	21556.7	19620.3	27251	27836	33488	30217	32370	33123.5	25768.3	23345	32080	23435.3	25635.7	35066.5	29318	32321.3	40750	40047.3	38815.3	40305	47184	53751.7	54705.3	47808.3	48758.3	26410.3	33141	25032	35624	25759.7	38663.3	41997	39964	39435	41439.7	66000.7	63888.7	69771	64895	64960.7
Elongation+factor+1+alpha+1+OS+Homo+sapiens+GN+EEF1A1+PE+1+SV+1	50483.1	44929	17	EF1A1_HUMAN	931695	997686	989023	1.195e+06	1.08391e+06	921536	943080	979192	907606	877076	692113	725283	714703	703917	717475	960435	951762	967760	953851	938317	890786	1.0317e+06	1.13257e+06	1.08008e+06	979345	762643	768084	761882	809825	747910	917900	872314	895110	1.12164e+06	934419	1.02936e+06	1.157e+06	1.1806e+06	1.18471e+06	1.14759e+06	885885	937532	1.07746e+06	1.06284e+06	1.02564e+06
Elongation+factor+1+alpha+2+OS+Homo+sapiens+GN+EEF1A2+PE+1+SV+1	50812.4	15398.7	12	EF1A2_HUMAN	6337.59	6504.45	7014.24	5761.41	9717	3841.84	8062	8956.69	6224.3	7386.6	6001.88	7577.93	9390	8668.33	9594.67	4745.11	6504.84	5604.99	4927.01	4920.31	56754.6	52651.7	52733.3	52617.3	51234.9	90121.7	89599.3	94098.3	71342.8	86057.3	7633.86	9563.67	7851.03	9610.33	11508	38495	38710.9	51655.7	40710.9	47366.3	131371	148427	127348	130484	110517
Elongation+factor+1+beta+OS+Homo+sapiens+GN+EEF1B2+PE+1+SV+3	24934.8	5210	5	EF1B_HUMAN	99439	92811	107008	75183.7	96675	90432.3	92794.7	77071.7	80228.3	103860	70617.7	77990	78225.7	76635	83519	101773	106070	109759	109789	115170	115469	114952	116097	117615	123377	93122.7	97265.3	96631	106880	104028	104050	112297	109027	119404	96838	117856	107700	113012	119240	110595	55865	55974.7	62862.7	54470.3	63810.7
Elongation+factor+1+delta+OS+Homo+sapiens+GN+EEF1D+PE+1+SV+5	31235.9	3212.11	8	EF1D_HUMAN	86260	85173.7	81957	65777	71792.7	84821	91347	80062.7	81799.7	84557	63591.7	55725.3	56339.7	62204.3	54691	87989.7	84956.7	97349.7	79498.7	84840.3	96870	91678.7	83617.3	85519.3	94406.3	78524.3	92019	90870	89074.7	92455.3	57116.7	67491.7	66353	69702.7	70587	99279.7	96897	85404.3	85257	85188.7	74059.3	73111.3	68312.3	70618	65824.7
Elongation+factor+1+gamma+OS+Homo+sapiens+GN+EEF1G+PE+1+SV+3	50461	8573.3	17	EF1G_HUMAN	76981	80857	76421.7	75806.7	76777.3	79939.3	81335.3	79998	78205.7	72616.3	64288.7	66253	61810	67934	65830.3	73216	69411	76863.7	71439.3	72118.3	111844	106326	103188	111826	109189	104414	109817	104891	108198	99805.7	70196	71840.7	76119.7	79595.7	69032	125691	129211	126010	135740	131091	123386	126227	127252	124792	129841
Elongation+factor+2+OS+Homo+sapiens+GN+EEF2+PE+1+SV+4	96307.8	24612.5	46	EF2_HUMAN	195660	206923	204419	204653	184975	187379	184086	213987	195396	199841	124669	129061	132774	165359	132627	195287	201981	198866	200354	191434	285996	259421	285406	285837	295987	256319	261020	259843	263688	275424	215262	221861	208291	227090	203839	327221	375499	320594	333199	387271	347231	366030	369190	371223	354530
Elongation+factor+Tu+mitochondrial+OS+Homo+sapiens+GN+TUFM+PE+1+SV+2	49883.8	1947.63	6	EFTU_HUMAN	34416.7	29826.3	22554.7	31783.7	22772.7	34778	32200.5	20708.5	13407	22261.7	30079.5	29070	29615.3	27254.3	32176	30281	30037	34889.7	30573.7	32161	41893	44386.3	28109.7	42991	45054.3	57216	60088.7	61893.7	58587	57277	34064	35760.3	35190.7	36509	29759.3	30128.7	43209.3	46064.7	47026.3	41579	54608.3	54112.3	55099.3	55235	53740.7
EH+domain+containing+protein+1+OS+Homo+sapiens+GN+EHD1+PE+1+SV+2	60684	1995.8	11	EHD1_HUMAN	26329.2	26660.8	30985.5	35389.4	37854.9	25632.3	27673.1	32150.1	35620.7	38945.3	27455.5	28258.5	29714.4	26515.9	27258.5	26794.1	26303.2	32094.2	32995.8	31110.4	62058.9	58289.5	56856.1	54657.6	55905	66697.1	72469.8	70146.2	65546.6	54085	38534.9	42341.4	41932.7	42372.3	40700.2	59799	57945.5	52298.3	52777.3	54230	66794	63609.7	64891.3	64048.5	79477.9
EH+domain+containing+protein+2+OS+Homo+sapiens+GN+EHD2+PE+1+SV+2	61332.6	8856.25	15	EHD2_HUMAN	58148.7	61157	67547.3	58191	62414.7	68293.3	72906.3	75229.7	67983.7	69994	78946.3	81293	81004.3	81171.7	85108.3	60499	60833	63225.7	65164	58114.7	31297	26508.7	27251	28568	24601.3	18247.3	18778.3	18834.3	20066	20391	66614.7	64032.7	69428	64207.3	63853.7	31617.7	62636.7	37453.7	34035.3	63653.3	19946.3	22339	20669	49685.3	21283.7
EH+domain+containing+protein+3+OS+Homo+sapiens+GN+EHD3+PE+1+SV+2	60944.3	987.63	6	EHD3_HUMAN	12425.5	10997.5	14099.5	17045.6	16044.4	13919.8	15368.6	18210.9	20984	22222.7	10302.9	9442.27	8791.48	10207.5	9346.23	11564.3	9730.7	13596.2	14397.7	12777.5	10907.7	11329.7	12261.2	11593.5	11803.7	4977.64	5018.49	5508.39	5376.66	5618.12	14194.3	17492.6	17487.2	17070.9	17611.2	19137.7	21501.5	19094.7	17142.4	17164.2	7812.68	7079.93	7007.42	7159.06	7534.56
Eukaryotic+translation+initiation+factor+3+subunit+M+OS+Homo+sapiens+GN+EIF3M+PE+1+SV+1	42959.2	1085.17	3	EIF3M_HUMAN	6277	6903	5535	6543	11897.3	5704	15225	14278.7	8784.33	14844.3	5065	4347	5722.33	5536.67	6911	7015	6365	9640.33	6459.67	18203.3	13331.7	13539	18160.7	17091.7	19767.7	5794	11533	10330.5	8471.5	15303.5	4433	7890.5	4630.33	13426	10271	18805.7	16090	20159	22113	16116.5	11219.7	14155.3	15295.7	15573	15518.3
Alpha+enolase+OS+Homo+sapiens+GN+ENO1+PE+1+SV+2	47511.2	47408.5	24	ENOA_HUMAN	409426	439330	451999	408571	427611	410332	394131	405179	357432	322023	867182	382210	380314	370011	383055	432270	440825	437428	443874	424700	388750	367136	373110	375390	372827	359295	359174	370565	361102	357563	421169	397787	400364	389540	462368	413870	431174	386561	386861	381014	364175	372548	361549	368531	356930
Beta+enolase+OS+Homo+sapiens+GN+ENO3+PE+1+SV+4	47274	14229.5	7	ENOB_HUMAN	11382	24378.3	17143.7	25663.1	22023.6	14422	12200	16565.6	35927.1	33038.5	16203.3	12480	33888.3	11948.3	37132.9	40505.7	34650.5	14141.9	40123.3	39231.7	29539.4	32646.9	29310.3	29034.3	28884.9	23138.8	27124.5	24980.9	26191	24033.6	45112.8	47807.7	42452.6	46776.5	24217.6	23181.6	23359.4	24015.8	25795.7	25935.7	17417	17836	22840.7	27096	21860.4
Gamma+enolase+OS+Homo+sapiens+GN+ENO2+PE+1+SV+3	47610.8	12236.9	13	ENOG_HUMAN	74220.3	77806.3	83141.7	82906.7	77620.6	74031.7	80767.7	82514.1	79491	81302.6	34981.7	73677	78377.3	72192.8	87450.3	75572.2	80582.3	80997.3	85703	86981	41825.6	73388.3	70988	70180	76083.3	66782.1	77395.3	73344.3	75393.3	59985.7	66922.6	89001.7	86377.3	97432	95873.3	70289	70049.3	71699.7	70065.7	47273.3	67930	69279	75250.7	71488.3	77143.3
Endoplasmin+OS+Homo+sapiens+GN+HSP90B1+PE+1+SV+1	92754.2	8838.12	34	ENPL_HUMAN	140692	144723	159460	148974	156838	155811	158294	159436	154078	149628	145040	146207	126114	152112	161107	146576	154629	157394	164156	134750	165963	169567	170251	171987	159682	181451	175590	178155	181287	179618	144738	154870	150157	154505	144652	161999	171728	162926	169858	161634	140879	139621	141513	147341	135196
Enhancer+of+rudimentary+homolog+OS+Homo+sapiens+GN+ERH+PE+1+SV+1	12430	6071.99	2	ERH_HUMAN	23683.5	23655	21204	28847	23913.5	27156	29507	23689	22936	26350.5	24042		23292	24149	18040.5	24146	26147	22298	23751.5	24663.5	47300.5	45927.5	43258	43224	46613	44217	43229.5	42971	43122	40345	28475.5	28002.5	27831.5	27331	26455	39145.5	40403.5	38774	37438.5	36334.5	18431	18664	13712.5	22415.5	20666.5
Endoplasmic+reticulum+resident+protein+29+OS+Homo+sapiens+GN+ERP29+PE+1+SV+4	29050.5	4152.05	3	ERP29_HUMAN	43193	33004	28478.3	43422	45679.7	27503.7	35377.3	16550	29503.7	36789.3	23466.7	24074	24283	33384	37675.7	33473.3	36168.7	35570.3	37172	44871	52783.3	54196	52950.7	54320.7	54223.7	55886.3	56172.3	44852.3	58214	49027	39709.3	38364.3	37638	40942	45065	38347	47917.3	48677.7	48263.3	48268	48262.7	46044.3	42242.7	42717.3	44340.3
Endoplasmic+reticulum+resident+protein+44+OS+Homo+sapiens+GN+ERP44+PE+1+SV+1	47370.5	2296.9	4	ERP44_HUMAN	13748.7	17477	30047	30820.3	30638.7	33104.7	31826.7	32959	31985.3	32215.3	33602	27345.7	25322.3	26248.3	31811.7	25928.3	15028	27678.7	26958.3	18872	35650.7	38421	37389.3	38021	34784	48194.3	44901.3	47728	48568.3	42781.7	30816.3	19674	30194	33850.3	35095.3	44333.3	47499.3	46585.3	42028.3	47039.3	32526.7	31872.3	32408	28202	34070.3
S+formylglutathione+hydrolase+OS+Homo+sapiens+GN+ESD+PE+1+SV+2	31976.1	4189.66	5	ESTD_HUMAN	17569.5	31582	21130	29841.7	28060.7	20437	18951.7	27946.3	29552.3	28269.3	18159	10105	23509.3	16313	24555	24237	20686.5	19555.5	26585.7	25264	29138	23938	15542.5	28877	21153.7		33788	17788	26985.5	22432	32376.7	30471	25881.3	31103	30682.3	28045	29809	26019.7	19902	27679.7	20548.7	25267.7	20969.3	22375.3	23804.3
Extended+synaptotagmin+1+OS+Homo+sapiens+GN+ESYT1+PE+1+SV+1	123370	1041.54	14	ESYT1_HUMAN	23095.7	19639.7	24045	27404.3	29206	25335.3	28577.3	34719	32834	24758.7	17566.7	19195.3	18486.7	22723	25640.3	20869	20467.3	25543.7	20695.7	27436	30564.7	23452	29210	30187	30310.3	26153	23219	23985.7	22569.7	26626.7	21763.7	24238.7	26250	31207.3	36419.7	21451	20616.7	23675	20115.7	20174.7	19063.7	18613	21881	20382.7	20131.3
Electron+transfer+flavoprotein+subunit+alpha+mitochondrial+OS+Homo+sapiens+GN+ETFA+PE+1+SV+1	35421.8	1839.31	5	ETFA_HUMAN	12009.3	14699	14764.3	17737	20060	11948	16849.7	18685.7	19134	20770.7	17123.3	12984.7	17865.3	17348	15082	16902.3	13716.7	15498.5	17665.3	17480.3	31803.3	32391.3	29251	28340.7	28662	41010.7	39988	38794.7	40386.7	39053.7	19249	20721.3	20585.3	19931.7	21477.7	21071.7	24889.3	26501	26200	20749.3	33655.7	34010.7	34815.7	31770	27759
Ezrin+OS+Homo+sapiens+GN+EZR+PE+1+SV+4	69527	1911.85	18	EZRI_HUMAN	29615.7	33864.7	32928.6	34634.9	43371.7	42336.3	40069.3	29883.7	33613.7	40358	31632.7	31078.7	33848	36048.3	33892.7	27894.6	32251	27429.3	26856.3	29772.3	59334.7	61353.7	58609.3	54986	58876	61268	68101	60740.3	66259.7	64276.7	31874.2	37856.7	40344.3	34623.2	34041.9	38415.3	48110.3	48673.4	47741.2	43977.2	52849.2	51605.1	51412.7	52342.7	51630.1
Fatty+acid+synthase+OS+Homo+sapiens+GN+FASN+PE+1+SV+3	276050	594.286	24	FAS_HUMAN	85457.3	135875	79352	102438	74633.7	84165.7	114323	122283	105855	80060.3	108801	108130	113393	89185.7	107185	104933	34036.3	113949	61630.3	89733.7	50976.7	54273.3	55015.3	53263.3	48773	64946.7	47865.7	49146	58391.3	43494.7	69945.7	77691	77640.7	69812.3	65367.3	66068.7	60245.7	57394.3	61339.7	59141	64931.3	64226.7	57423.3	50895	48037.7
Fermitin+family+homolog+2+OS+Homo+sapiens+GN+FERMT2+PE+1+SV+1	78488	2696.7	7	FERM2_HUMAN	40134.7	47738	41769	38940.3	41360.7	39022.3	39519.7	40580.3	37678.3	37844.7	38903.7	39321.7	39749.7	30050.7	39444.3	41761	43315.7	47312	43535.7	36754	29127.3	21569.7	22200.7	24794.3	23709.3	19604.5	15331.7	20853	22866.7	15320.7	41420	39853.7	42660.7	41419.3	35529.7	22172	22345.3	21104.3	22047.3	21125.3	16545.3	21583.3	21281	18685.3	22655.7
Four+and+a+half+LIM+domains+protein+1+OS+Homo+sapiens+GN+FHL1+PE+1+SV+4	38030.9	7177.6	7	FHL1_HUMAN	102001	88646	107959	105872	83387	77541.7	76613.7	92033.7	94453	76582.7	94249	112761	114096	107777	112656	89354	84678.3	108537	102843	95546.7	35351.3	36277.3	39185.3	34904	37140.7	22954.7	22827.7	12564.5	17380.7	20367.3	102581	100030	100173	103902	100313	38384	46423.7	43149.3	47068.3	39437.3	13374	10713.3	18457	12351.7	12900
Four+and+a+half+LIM+domains+protein+2+OS+Homo+sapiens+GN+FHL2+PE+1+SV+3	34188.8	882.948	3	FHL2_HUMAN	17706.3	19080	18384.7	23859	17785.5	16942.7	16779.3	18989	18395.7	16963	15341	17457	16394	17805.3	16753.3	14212	18073.3	16069	15265.7	15608.5	10005.5	9600.5	4653	5803.5	2626	7531		6901	5529		17865	24186	17893.5	23864	16029	7923.5	14001.5	7866	7509	8844	1735				7368
Fibronectin+OS+Homo+sapiens+GN+FN1+PE+1+SV+4	266218	4667.83	47	FINC_HUMAN	31848	36908.3	32877	32606.3	36867.3	112473	112125	104378	108173	79206	135325	138454	145844	119072	146350	37539.7	34114.7	36307	30843.3	32518.7	16445.7	19208.7	18467.7	20310	19560	23860.3	19921.3	19994.7	16713.7	17620	34928.3	33152	35199.3	31306	29342.3	20275.3	19557	15664.7	20218.3	20618.7	14962	17415.3	14713	15966.7	17908
Peptidyl+prolyl+cis+trans+isomerase+FKBP10+OS+Homo+sapiens+GN+FKBP10+PE+1+SV+1	64758.4	3634.3	14	FKB10_HUMAN	83530	84324.7	81709.7	90223	82987	78916.7	69188	71098.3	72660.7	67570.7	78912	85962	87129.7	83616.3	91078	87071.7	84228.7	77166	78594	92239	64443.3	66087.3	62572.7	56510.7	62511.3	42511.7	48883.7	47244.7	45729.3	42048	86261.7	90857.7	89551.3	90992.7	82783	69264	60836.7	66385.7	58109.3	57613	24767	32401	42113	42092.7	41193.7
Peptidyl+prolyl+cis+trans+isomerase+FKBP9+OS+Homo+sapiens+GN+FKBP9+PE+1+SV+2	63539.9	4209.37	9	FKBP9_HUMAN	49156.7	53542.7	54606.3	50834.7	49761.3	45156.7	43695.3	46817.7	46281	40979.3	54985	54834.3	52878.7	54822.7	53090.7	52533.7	52176.3	50701	53134.7	51523.7	25742.7	24002.7	32997.3	28350	30909	24885	14470.5	17640	14581.5	21781	58692	57690.3	54960.7	57167	59083.3	29340.3	27364	28113	33288	34658	11707.3	15850.7	16428	16791	18172.3
Filamin+A+OS+Homo+sapiens+GN+FLNA+PE+1+SV+4	283477	15252.6	120	FLNA_HUMAN	271104	276352	282344	280116	272760	251483	233238	261002	257334	256117	270513	286931	287115	282641	288955	260283	258632	265383	266017	270669	122879	123046	120211	122410	124007	82254.7	81048	82602	84856.3	73190.7	259308	258883	260459	262103	243056	147127	147040	154878	155106	148623	95632.3	94270.3	98906.7	95427	94276.3
Filamin+B+OS+Homo+sapiens+GN+FLNB+PE+1+SV+2	280331	1055.07	50	FLNB_HUMAN	30825	31070.3	32019.3	36006	27673	33043	39222	31188.3	33547.7	36035	23916.7	26820	29824.3	52229	28684	28552.7	33278.7	36164	28386.7	32243	26168.3	33239.3	33533.7	28618.3	27588	36114.7	41068.3	36275.3	40051	38277.3	29995.3	55060.3	35087	37125.3	37616	50488.7	48422	46605.3	45698.3	47457.3	28169.7	32343	33963	27261.3	33615.7
Filamin+C+OS+Homo+sapiens+GN+FLNC+PE+1+SV+3	293589	2710.1	78	FLNC_HUMAN	117213	193752	153997	124362	115366	122961	140609	149314	121580	140196	156352	111397	119184	117473	115306	131123	113358	118357	119308	190770	145722	145161	144508	140844	133168	130108	135730	138172	135575	130910	133520	140643	107149	142139	116907	114739	139976	138293	145909	149069	135219	159874	158708	166418	130859
Fascin+OS+Homo+sapiens+GN+FSCN1+PE+1+SV+3	55157.3	3353.6	12	FSCN1_HUMAN	58066.3	58244	52148.3	51950.7	52601.7	57543.7	57193.7	45514	50241.3	46059.7	42171.7	44112.3	42387	50638.7	50249.7	57948.3	52749.7	47616.7	50332	49780.3	40821	36489.7	45970.3	44415.3	41364.7	41161.3	39248.7	46139.3	36955.3	38047	50372.3	54886.3	51701.7	63874.3	57675.7	38554.7	39531.7	34322.3	42055.7	42147.7	36363.7	48264.7	34698.3	34694	47233.3
Glyceraldehyde+3+phosphate+dehydrogenase+OS+Homo+sapiens+GN+GAPDH+PE+1+SV+3	36224.4	78899.6	18	G3P_HUMAN	1138156	1171201	1.13314e+06	1139886	1291578	1.0918e+06	1085944	1.09028e+06	1.09169e+06	1064983	1.05172e+06	1.07673e+06	1.00098e+06	1.10222e+06	1091907	1.06113e+06	1077708	1.05951e+06	1.08301e+06	975001	1370831	1319387	1323787	1401507	1075606	813823	849175	893729	953378	1.08026e+06	1.13077e+06	1.07553e+06	1.0715e+06	1.27858e+06	1426307	1.29351e+06	1580567	1.40475e+06	1249091	1.49935e+06	1.01736e+06	1.1069e+06	1111626	1.11081e+06	1.28597e+06
Glucose+6+phosphate+1+dehydrogenase+OS+Homo+sapiens+GN+G6PD+PE+1+SV+4	59713.1	1780.04	7	G6PD_HUMAN	30530.3	28772.7	28459	29813.3	35339	31190.7	32693	29111	28637.7	23629.7	25928.7	33265.3	32682	25149.3	27818.3	30630.3	30710	34463.3	30475.3	30017	27255.3	22220.7	21746.7	26201.7	28211.3	29493.7	30953.3	33383.3	34320.7	32960.7	33293.7	35823.3	28025	37804.3	33023	31630	28622.3	20135.3	22106.3	23070.7	31126.3	31726	31023	27507.7	30697.3
Glucose+6+phosphate+isomerase+OS+Homo+sapiens+GN+GPI+PE+1+SV+4	63375.4	10390.4	20	G6PI_HUMAN	83353	84194.3	85316	82642.7	78804.7	73304	73216	72842.3	74605.7	74907.3	68854.7	65995.7	71220.3	66963	67979.3	72913.3	77224	80912	80755.7	79983.3	95791	92744	97264.7	98435	98031	115194	121106	115761	120132	121509	90431.3	87543	90109.7	89574.7	80975.3	101141	106978	109747	109339	110468	155398	156772	159122	163753	152150
Neutral+alpha+glucosidase+AB+OS+Homo+sapiens+GN+GANAB+PE+1+SV+3	107330	2594.54	33	GANAB_HUMAN	92228	90843	75058.7	73027.7	77066.7	88730	70881	81060.3	70135.7	71311	91629	94408.3	86248.7	91478.3	89986	95315.7	102588	74252	71495	71539.3	66645	69107	69362	71526.7	66094.3	59831.3	55027.3	67667.3	62803.7	64172	81340.7	82678.3	77467	79041	84483	70295.3	69129.7	65737.3	67480.3	64414	67044.7	75295.7	75525.7	66069.7	67642
Guanine+nucleotide+binding+protein+subunit+beta+2+like+1+OS+Homo+sapiens+GN+GNB2L1+PE+1+SV+3	35533	8400.16	17	GBLP_HUMAN	91971	87187.3	98207	104999	102618	92309	82288	104787	104942	84587.7	67121.3	71192.3	70529	81969.3	86517.3	90629.3	93181.3	100849	96817	80149.3	106078	112818	108980	111382	107424	97879.3	112628	82423	113938	94123.7	102234	91791	104320	104840	104204	118303	111896	102681	114955	92311.3	92051	91676.7	93643	95199.3	87781.7
Rab+GDP+dissociation+inhibitor+alpha+OS+Homo+sapiens+GN+GDI1+PE+1+SV+2	51210.1	5788.86	16	GDIA_HUMAN	15975.3	15750.7	17989	19675.9	16530.6	13189.2	23554.8	20491.4	20669	17252.7	12210.4	14301.6	13010.1	12153.8	12370.8	15188.6	12334.6	16115.5	12767.3	19581.4	16296	16973.6	17629.4	16852.3	14719.6	29318.3	30691.3	30203.4	28231.2	29057.4	16963.8	17443.3	12613	17900.4	16571	19015	19507.2	18218.2	19905.3	16796.9	20907.6	16904.2	22173.8	22500.5	17128.2
Rab+GDP+dissociation+inhibitor+beta+OS+Homo+sapiens+GN+GDI2+PE+1+SV+2	51119.6	7154.1	21	GDIB_HUMAN	63826.3	64639.4	66006.7	54975.1	54262.6	53411.4	70813.9	67289.3	55035.7	81587.3	44602.2	45694.7	48812.6	58310.2	56410.8	65707.7	63359	68046.2	65636	83010	92126.3	84127.4	87703.6	83748.7	92254.1	75020	78453.1	82488.9	84901.1	81295	90373.6	77100.7	82441.3	75877	65882.7	112895	116142	114007	116500	107071	117579	117753	121894	107959	80619.1
Rho+GDP+dissociation+inhibitor+1+OS+Homo+sapiens+GN+ARHGDIA+PE+1+SV+3	23264.2	27793.7	5	GDIR1_HUMAN	61296.7	68133	67437.3	67280	51578.7	69524.3	69719.7	71783.3	70841	70205.3	66176.5	50167.3	49051.7	53495	47936	74485	55451	54060.3	56279.7	52583.7	60303.7	102498	58179	60051	59453.7	77548	86966.3	85592.3	83076	72236.3	63559.7	60941	63346.3	53729	61653	79124.3	80457	75619	73023.7	74764.3	73177	74646	74459	66237.7	66835.7
Gelsolin+OS+Homo+sapiens+GN+GSN+PE+1+SV+1	86096.8	3663.51	24	GELS_HUMAN	94836.3	99847.7	97438	105152	99595.7	92084.7	93804	99265	100492	84390.7	83015	94310.3	80110.7	93505.7	87703	91660.3	90296	83755	96961.7	94239.3	70853.7	77960.7	73836	67219.3	75159	96537.7	96494.7	88423.7	96973.3	73094	98914.3	93497.3	102460	97929.3	98466	54576.7	91164.7	89919.3	93982	83831.7	125042	109017	108433	106369	103610
Glial+fibrillary+acidic+protein+OS+Homo+sapiens+GN+GFAP+PE+1+SV+1	49937.3	2197.23	12	GFAP_HUMAN	23065.3	22946.7	19151.7	23462	22368.7	25858.3	25440	24472.7	26423.7	27550.3	15774.2	21313.7	22693.3	22885.3	16753.4	21750.7	22402	23657.7	22974	22128.5	23648.5	24574	22836.6	21609.6	22680.7	22644.3	22800.5	19003.7	19274.5	17712.1	23239.8	23863.7	27821.8	24762.3	24194.7	23803	23786.5	22534.5	25242.3	24333.3	24177.7	21162.2	21668	18808.3	21507.3
Glucosamine+fructose+6+phosphate+aminotransferase+isomerizing+1+OS+Homo+sapiens+GN+GFPT1+PE+1+SV	79605	1005.48	2	GFPT1_HUMAN	12864	13687.5	11973.5	11963.5	13364	11665.5	10643.5	10509	10834	12219	9431	9494	8919.5	5070	7241.5	8946	13155.5	11261.5	11261	11528.5	14370	13079	14483	13865.5	14284	10621	9196	9609	9967	8185	14494	15241	14527.5	14489	15157	14293.5	14332	12967	13776	12006.5	16300.5	15309	16212.5	15247.5	16561
Gamma+glutamyl+hydrolase+OS+Homo+sapiens+GN+GGH+PE+1+SV+2	36363.6	1836.97	2	GGH_HUMAN	5042	6487	6141	6781	7748.5	7853	7857	7830	7659	8389	4476	4614	7981.5	7792.5	4914	7759.5	4703.5	4989	4765	7789	17815.5	17823.5	17985	16186.5	18291	25129.5	25305	24891	25497	24611.5	8014.5	8942	6775	7087	9672	13647	14141.5	12009	11704.5	14330	21344	21768.5	22514	23191	20601.5
Glucosidase+2+subunit+beta+OS+Homo+sapiens+GN+PRKCSH+PE+1+SV+2	60395	2629.63	11	GLU2B_HUMAN	67195.7	70921	69446.7	78117.7	74958	48741.3	64297.7	67082.3	48294.3	62218.7	57743.3	62908.7	47808.3	49688.3	68136	54304.3	75075.3	76506.7	73475.3	75691.3	93136	96187	96626.7	95961.7	70573	66478.7	63637	69570.3	67959.7	60576.7	78709	76681.3	75289.7	67797	62692	73611.7	75160.7	80556.7	78329.7	67279.3	60060.7	60184.7	59021.7	65773.7	61448
Serine+hydroxymethyltransferase+mitochondrial+OS+Homo+sapiens+GN+SHMT2+PE+1+SV+3	56449.3	2000.59	3	GLYM_HUMAN	19008.5	21190.7	24008.5	20542.7	24545.7	21344.7	22843.5	24501.3	23849.3	21576.3	24058.5	18194.3	20387	19189	21474.7	19965.7	21768.7	16868	15159	16651.3	33981	30365.3	24574	29892.7	28920	36368.3	32234.3	36369.3	33492.3	23566	23490.3	25468	24944.7	25571.3	31058	29570	22322.3	36545.7	35080.7	29309.7	38197.5	29691.3	40275.7	33172.7	36818.7
Golgi+reassembly+stacking+protein+2+OS+Homo+sapiens+GN+GORASP2+PE+1+SV+3	47316.5	979.884	2	GORS2_HUMAN	12849	13026	14238	13884	16762.5	12364.5	15436.5	13745	13380.5	15484.5	5990	8042	11141	11266.5	11929	12650.5	13504	15205	13816.5	13775	11968	6969.5	12319.5	12247	12949	14460	11937	13536	12847	18177	13809.5	15287	14959.5	15073	13491	14097.5	14274	14408	13598.5	15928.5	9822	10872	10073.5	11283	9882.5
Stress+70+protein+mitochondrial+OS+Homo+sapiens+GN+HSPA9+PE+1+SV+2	73965.8	5002.44	28	GRP75_HUMAN	70125.3	75821.3	90898.3	78242.3	85094.3	63690.3	79693.3	84385.3	100607	81422	61696	71054	67490.7	96549.7	73366.7	72925.7	83340	75560	89633.3	78963.3	148625	146382	150459	141083	146166	166836	169824	173606	172393	133735	77984.7	84954.3	97348	69617	69551	139557	137149	133234	141392	140467	140714	146622	129293	126228	151874
78+kDa+glucose+regulated+protein+OS+Homo+sapiens+GN+HSPA5+PE+1+SV+2	72447.1	14935.9	33	GRP78_HUMAN	249478	240262	250037	276318	279033	219951	213136	249961	211449	215513	232665	236436	236231	237987	236587	242391	255461	251806	260059	260191	404021	291207	264756	271107	284625	340657	326285	333841	326842	318133	228742	258296	319408	287540	250997	261445	285885	242908	272576	279246	247714	240976	245830	253773	247539
Glutathione+S+transferase+P+OS+Homo+sapiens+GN+GSTP1+PE+1+SV+2	23584	12097.5	13	GSTP1_HUMAN	180652	179882	180884	180457	189174	124105	155073	170448	156099	161696	158992	159359	155349	155141	157904	190789	171785	167788	174511	174540	194836	196155	196937	187228	180095	252493	239620	236159	234871	219519	197679	175908	181794	175208	195741	206460	227288	215478	204470	225207	196571	196994	195832	184171	191029
Histone+H1+2+OS+Homo+sapiens+GN+HIST1H1C+PE+1+SV+2	21364.8	5351.75	6	H12_HUMAN	76254.2	130593	95065.7	93870.1	79597.4	104697	136883	121764	115110	110088	109652	108650	107288	112088	114490	112299	117887	116068	103428	103031	84343.3	73543.2	70576.9	106864	106418	68457.3	66590	53990.7	51299.6	53329.6	62934.3	63659.3	64815	64293.3	54251	61434.6	62504.9	61527.2	63072.7	59238	48810.7	51806.2	46536.7	45786.7	45410.7
Histone+H1+5+OS+Homo+sapiens+GN+HIST1H1B+PE+1+SV+3	22580.2	2449.8	5	H15_HUMAN	94601.5	95199.4	106026	102234	95034.3	95725.2	88135.3	95954.7	99248	87160.8	82968.9	61295.8	83919.5	82158.8	110637	98094.6	103990	58485.4	109723	95555	88136.7	81866.1	84190.7	86262.7	89494.9	62870.3	61461.5	57597.3	57782.1	61318.7	84591	83156.3	74033	74313.7	80719.3	64873.8	73787	73338.5	68208.3	69512	70275.8	67883.1	67489.8	69381.4	68200.4
Histone+H2A+type+2+B+OS+Homo+sapiens+GN+HIST2H2AB+PE+1+SV+3	13995.3	71545.7	5	H2A2B_HUMAN	495058	508441	494976	514854	534276	473475	461549	435187	449129	438020	375812	391467	386159	356087	402426	435240	440129	443662	441288	435102	673496	664569	557563	614172	565635	208266	214063	219393	198407	215142	365559	337134	372242	384065	338076	614069	603571	621155	619500	580796	302221	260121	257854	308274	304105
Histone+H2A+type+2+C+OS+Homo+sapiens+GN+HIST2H2AC+PE+1+SV+4	13988.4	64097.1	5	H2A2C_HUMAN	243967	222373	221157	251895	231094	334188	301602	297631	393617	310064	161302	244560	262788	243644	257936	278971	288541	305826	306265	292710	122450	123755	113268	131951	121542	299348	318696	317672	276823	308397	232571	215867	170690	251426	232970	349637	351775	358605	350238	337502	184122	167416	165569	190167	184792
Histone+H2A+V+OS+Homo+sapiens+GN+H2AFV+PE+1+SV+3	13508.7	7781.81	4	H2AV_HUMAN	170192	134516	137172	172587	137266	179059	147173	154385	250529	171051	57584.9	139230	155170	143637	144299	107345	110761	122498	126245	115385	128904	169435	142583	179403	166074	67363.7	71774.8	68624.7	60801.7	59927.4	170075	124018	42054.7	139020	198688	234051	252877	254601	220058	233300	107224	112568	111854	113327	108668
Histone+H2B+type+1+A+OS+Homo+sapiens+GN+HIST1H2BA+PE+1+SV+3	14167.5	12297.5	4	H2B1A_HUMAN	52635	52433.8	52216.6	53372.6	37042.1	59791.6	57144.5	56830.1	56169.4	52619.6	41513.3	29029	28610.8	36500	37590.9	48694.1	47580.2	48013.7	47885.6	44424.1	28748.5	28396	28142.4	27140.9	25452.1	9610.1	9517.76	8975.66	9122.51	8775.16	43701.5	47898.5	49836.3	48739	42979.7	40458.8	37832.6	28792.6	36174.8	35354.8	12917.5	12871.8	13117	10976.3	12119.7
Histone+H2B+type+1+D+OS+Homo+sapiens+GN+HIST1H2BD+PE+1+SV+2	13936.2	55641.6	7	H2B1D_HUMAN	539047	548523	552800	501947	486628	331875	427334	484913	520784	545751	517301	538301	530279	503560	528658	542357	542288	530269	537453	506488	592341	582539	572406	582976	558020	408512	418037	405400	409986	346894	511258	522138	533699	542303	494777	496528	498378	493721	483555	259824	384385	378566	396452	395799	392729
Histone+H2B+type+1+J+OS+Homo+sapiens+GN+HIST1H2BJ+PE+1+SV+3	13904.2	48251.2	7	H2B1J_HUMAN	163707	163008	160695	154941	148437	116418	151707	171046	183386	195132	180097	188664	186322	171493	183196	171649	173893	173342	173956	169080	177360	165140	172612	166156	151307	128300	132626	123460	124532	105480	169433	175308	173679	172406	166334	188318	185656	188030	187109	107564	133054	133408	136716	137207	132584
Histone+H3+1+OS+Homo+sapiens+GN+HIST1H3A+PE+1+SV+2	15518.2	61741.3	5	H31_HUMAN	141642	157653	159049	151923	151527	261906	298542	307130	310173	327726	150748	167506	225003	160510	163370	134741	137377	135115	135338	125518	89219	94012.9	92326.6	91466.2	87341	143943	148891	137289	134880	111767	114398	116288	121897	115134	113264	287880	295818	308236	283757	299469	113969	119803	118036	118933	119356
Histone+H3+2+OS+Homo+sapiens+GN+HIST2H3A+PE+1+SV+3	15445.1	79869.3	5	H32_HUMAN	55520.5	62223.5	64237.8	60312.3	60890.1	93162.5	112065	111265	113641	120249	56199	64568.5	86757.8	61821.8	65495.9	53159.9	54259.2	54373.7	56286.3	51536.7	38053.9	39202.6	39458.4	39824.1	36965	61289.6	61931.5	61036.2	59477.9	49758.6	50427.7	53622.3	54226	51658.4	51698.5	120906	125870	128515	124278	128529	60287.9	63247.4	64667.4	64098.1	65489.9
Histone+H3+3+OS+Homo+sapiens+GN+H3F3A+PE+1+SV+2	15385	105300	4	H33_HUMAN	157759	177625	175720	163759	178722	167691	193397	195787	194364	205360	133046	146936	208392	137757	144944	147804	151058	151185	150365	148850	230026	237779	241166	235978	239373	226812	238584	227504	225413	218762	139376	147158	148018	141303	146194	231707	234765	240036	229416	240113	248483	252876	251303	257822	259174
Histone+H4+OS+Homo+sapiens+GN+HIST1H4A+PE+1+SV+2	11367.4	34668	7	H4_HUMAN	570882	659253	638919	685825	652664	643925	729454	738647	989703	745598	638513	633291	642828	561854	652952	645555	599722	647021	665043	744510	760818	795957	713470	679356	664144	452505	441543	449066	418548	439196	529441	515704	570506	523245	634802	674928	615506	885425	854190	632061	462215	607842	648041	615564	586788
Putative+heat+shock+protein+HSP+90+beta+2+OS+Homo+sapiens+GN+HSP90AB2P+PE+1+SV+2	44520.1	7993.16	12	H90B2_HUMAN	11629.7	12230.4	10446.7	11608.3	11208.1	10226.2	10226.6	9191.32	13094	8124.88	15376.5	16685.4	9363.51	9884.69	13846.8	12437	10886.4	11219.5	9975.66	10221.3	14012.1	12584.3	9758.56	13202	11852	28284	30126.7	28056.9	27394.9	27855.8	9433.05	10534.5	8912.87	11827.8	9698.91	31882.2	31068.8	25901.4	29136.9	27651.9	32541.6	31161	31338.8	30990.8	31158.2
Putative+heat+shock+protein+HSP+90+beta+3+OS+Homo+sapiens+GN+HSP90AB3P+PE+5+SV+1	68667.1	8075.76	15	H90B3_HUMAN	55306.3	53994.3	61041.9	57384	51661.5	46187.9	46183.8	42832.7	42565.2	40305.8	51089.4	53512.2	50483.8	51008	46752.2	71100.6	71245.7	71562.8	67914.7	65737.4	41811	40794.1	35370.8	39695.5	40031.6	32893.1	32922	33321	31826.4	38316	55698.8	52844	56700.8	55743.4	58616.4	45582.1	40244.6	34395.5	42116.2	39077.2	59635.9	51513.8	50313.1	49727.5	53196.2
Putative+heat+shock+protein+HSP+90+beta+4+OS+Homo+sapiens+GN+HSP90AB4P+PE+5+SV+1	58891.8	2106.61	8	H90B4_HUMAN	8042.2	7576.8	7447.65	10579.2	4584.56	5714	3078.19	6031.1	6314.1	2581.82	3053.39	2712.16	4044.46	1290.71	4885.51	5939.81	4866.55	5244.34	8433.15	5644.21	3177.31	2797.9	2612.38	718.797	1942.43	7858.52	1450.18	1590.02	1621.37	2117.57	2805.25	2334.53	5687.42	7968.58	1118.42	1111.69	1466.24	803.093	3247.7	1097.07	2464.36	2511.64	1754.2	1123.86	1002.85
3+hydroxyacyl+CoA+dehydrogenase+type+2+OS+Homo+sapiens+GN+HSD17B10+PE+1+SV+3	27151.2	5333.08	9	HCD2_HUMAN	17167.3	21716.3	21019.3	18667.7	20055	21135.7	21280.7	16649.7	17483	19069	17500.7	20620.7	22257.7	20756.7	16435.7	20723	20482.3	22213.7	20322.7	21483.3	40081.7	35884.7	32019	42043.7	38400.7	54617.7	53308.7	51095	54863.7	50766	19715.3	20583.7	18915.7	20749.7	19903	29533.3	30971.7	32044.7	32116.7	35772.3	42475.7	41515	39826	43667	41400
Hydroxyacyl+coenzyme+A+dehydrogenase+mitochondrial+OS+Homo+sapiens+GN+HADH+PE+1+SV+3	34350.6	4265.52	4	HCDH_HUMAN	16685	14424.5	14862.3	13108.3	16098.5	16275.5	14919	16164.3	18836	15841.3	13771.5	16296	14311.5	12365.5	17681	13753.3	11902.5	35087	16851	18066	18863.3	15776.7	21079	21970	16856.3	33024.3	33094	32614.7	35651.3	33875.7	12591	15166	15584.3	14132	16209	24706.7	25258.3	37590	28199.3	29324	27304.7	31721.3	32651.7	30820	31612
Heterogeneous+nuclear+ribonucleoprotein+D+like+OS+Homo+sapiens+GN+HNRPDL+PE+1+SV+3	46608.7	1963.21	4	HNRDL_HUMAN	30079.2	36363.4	28851.1	38232.8	30311.1	35794.4	35659.1	37260.5	39438.3	38582.2	23740.4	26552.6	25301.3	32123.7	31225.1	34136	32943	37691.9	38865	30522.4	37020	37169.9	35600.3	35251.6	34649.7	52629.5	46057	32388.7	44408	49803	36530.3	34006.7	34269.7	34812.6	33502	46963.5	46868.7	45953.1	46608	45753.2	28279.1	26508.1	33510.4	25882.9	33319.6
Heterogeneous+nuclear+ribonucleoprotein+H+OS+Homo+sapiens+GN+HNRNPH1+PE+1+SV+4	49514.7	3377.67	12	HNRH1_HUMAN	48611.1	44143.1	45723.8	45661.4	48022.3	48821.5	46280.6	54164.6	51232.7	51524.4	40895.6	43913	43723.8	38083.1	44018.3	47017.2	51578	48325.6	47694.3	50687.8	58849.7	60248.4	58212.4	62316	63281.3	37906.2	42355.3	43759.3	44272	43888.3	48178.3	55049.8	54794.1	55365	55474.3	63629.5	65100	62555.8	64070.5	61536.5	36051.5	39733.2	37718.7	34710.9	38846.5
Heterogeneous+nuclear+ribonucleoprotein+H2+OS+Homo+sapiens+GN+HNRNPH2+PE+1+SV+1	49548.8	2076.16	10	HNRH2_HUMAN	20719.8	25555.5	25474	24304.4	25232.6	25163.7	24379.5	25000	24363.6	25896.2	23093.3	19498.6	19246.9	27263.6	24652.1	27171.6	21822.5	26267.2	26479.2	26342.9	30698.9	32977.3	35202.8	34184.3	36142.8	31644.3	32967.4	33090.7	27299.8	32432	24176.7	25662.9	25032.9	25901.7	21905.6	29368.1	27803.6	30102.2	26935.5	25030.9	30132.2	31436.4	31590.3	29077.4	31318.6
Heterogeneous+nuclear+ribonucleoproteins+C1+C2+OS+Homo+sapiens+GN+HNRNPC+PE+1+SV+4	33727.1	4134.99	7	HNRPC_HUMAN	94863.3	100241	98494.3	101631	97639.7	116647	119276	117645	112245	117944	98782	101660	67546.7	105618	96198.7	103107	105100	102405	97753.3	100617	174556	173196	168308	167034	161180	106781	102368	103003	103738	98311.3	104350	103662	105906	102568	102152	151305	139539	140987	147054	146322	92734.7	96090.3	95009.3	90960.3	93861.7
Heterogeneous+nuclear+ribonucleoprotein+D0+OS+Homo+sapiens+GN+HNRNPD+PE+1+SV+1	38605.3	4097.68	7	HNRPD_HUMAN	75367	70020	72029.7	70860.3	75160	76172	79042	76666.7	77929	75071	70565	70166.7	82104.3	77174.7	77858.7	76616.3	81773.7	79810.3	82105.7	77054	78833.3	74933.3	71300	70407	70914	61607.3	59232	61957.7	62590	56283	80329.3	80084	76345	76415.3	79687.3	72444	76266.7	71525.7	80411.3	75892	62696	63073.7	62341	66111.3	62811.3
Heterogeneous+nuclear+ribonucleoprotein+F+OS+Homo+sapiens+GN+HNRNPF+PE+1+SV+3	46014.1	3014.44	9	HNRPF_HUMAN	23369.2	26874.5	29889.5	32430.5	28719.8	36478.1	37759.6	41968.1	29791.7	38696.3	22096.8	24681.7	24618.5	19203	25850.9	17571.8	21891.2	23268.9	29409.4	26702.8	42570.4	43305.3	43613.2	44560.7	48011.9	33874.5	35440.2	32248.6	33631.9	36202.8	37830.2	40499.8	32260.9	36872.6	42125.1	50290.3	50465.3	50773	47394.3	40935.4	27463.3	26257.6	28949.7	28128.3	20793.3
Heterogeneous+nuclear+ribonucleoprotein+K+OS+Homo+sapiens+GN+HNRNPK+PE+1+SV+1	51261.5	9193.1	16	HNRPK_HUMAN	128545	128629	131502	127615	129373	145826	140505	142044	142355	136963	118426	119859	121883	119201	124910	132667	130803	129882	131395	132349	159032	152803	159656	145597	160616	145206	151105	146899	147308	132401	135885	132185	132597	128291	127992	143601	150128	151439	154011	151670	120137	119360	122952	121484	122434
Heterogeneous+nuclear+ribonucleoprotein+L+OS+Homo+sapiens+GN+HNRNPL+PE+1+SV+2	64760.2	1228.17	7	HNRPL_HUMAN	35408.7	32582.3	31795.3	34469.7	31749	44318	39595	39389.7	39876.3	33208.7	31186.7	33407.7	28430.3	32313.7	29320	29015	30551.7	27653.7	31055	33140	32244	35945.7	37796.7	38108.3	33861.7	27026.7	23741.3	29253	24061.3	26595	36705.7	38189.3	32548	35830.3	33960.7	42140	45386	49787	47073.7	45034.7	33331	31519	25791.3	35451.7	30883.3
Heterogeneous+nuclear+ribonucleoprotein+M+OS+Homo+sapiens+GN+HNRNPM+PE+1+SV+3	77801.1	1907.17	14	HNRPM_HUMAN	55738.7	57963	67688	56680.3	70280.7	70007	70488	56670.3	67200.3	69887.7	52494.7	66383.3	67487	55759	68539.3	59242	58785.3	69435	65626.7	71357.3	85395.7	85362	79164	79864.7	83321.3	67119.3	63809	68400	65104	64641.3	69229.7	65611.3	54610.7	55089.3	70473	89377.3	88954.7	81256.3	85392.7	90516.3	73862.3	72932	69165.3	69849	85450.3
Heterogeneous+nuclear+ribonucleoprotein+Q+OS+Homo+sapiens+GN+SYNCRIP+PE+1+SV+2	69830.8	2448.26	19	HNRPQ_HUMAN	41221	48694.3	39768.7	43622.3	48445.3	42264.7	43760.3	41269.7	50374.3	37706	30802.7	51045.7	45684.7	53252.7	38632.3	45110	43711.7	42219.7	39984	51145.7	49814	49406	50217.7	41779.7	51181	45244.3	43242	45713	46778	37008.7	40537.3	45784.3	43256.3	44132.3	50263	47322.7	33649	48422.3	47777	40784.3	42376	46294.7	40515.3	39170.7	35874.7
Heterogeneous+nuclear+ribonucleoprotein+R+OS+Homo+sapiens+GN+HNRNPR+PE+1+SV+1	71228.3	1123.15	9	HNRPR_HUMAN	29586.3	37421	38755.7	38841	48158.7	35552	38535.3	34171.7	42973	54882.7	32577.3	36707	43363	41662.3	44196.3	42846.3	38401	41283.7	32792	49288.3	43259	46224.7	45632.3	45706.3	52503.3	36907.7	45348.7	47908.3	56493.7	57759	37138.7	40586.7	44954	41147.7	48944.7	53175.7	56374.3	46944	60547.3	67552.7	21073	31010	30435.7	31144.3	35413.7
Heterogeneous+nuclear+ribonucleoprotein+U+OS+Homo+sapiens+GN+HNRNPU+PE+1+SV+6	91325.9	3476.73	17	HNRPU_HUMAN	86423	89574.3	92544.7	85819.3	86502	96880.3	108158	91862	103780	97748.7	57430	79357.7	83732	70923	84300	90319.3	91471.3	94908	89691.3	87226	103060	106648	98331.7	105093	101536	60039	64434.3	72825.7	71879	68928.3	90824	92473	92583.3	91450.3	91500.3	108506	109727	110074	109560	108492	76707.7	73341.3	72908.7	76083.7	68103
Heat+shock+protein+105+kDa+OS+Homo+sapiens+GN+HSPH1+PE+1+SV+1	97777.6	2111.66	17	HS105_HUMAN	28150	25497.7	25134.7	25606.7	28177.7	22684.7	28350.7	25151	23009	25434.7	18299.7	23982	18611.7	18248	24099.3	28817.7	29294.7	26719.3	23364	27660.7	61960	60437.7	64187.3	59595.7	65014.3	50343.7	46522.3	52081.3	50545.7	49039.7	29848.7	30722.3	29281.7	30344.7	35110	53167.7	50560	52991.7	49461.3	49942.7	59779.7	59646	57485.3	59936	50973.3
Heat+shock+70+kDa+protein+1+like+OS+Homo+sapiens+GN+HSPA1L+PE+1+SV+2	70774.3	10964.6	17	HS71L_HUMAN	16619	19395.3	13834	17028.7	18104.3	15761.7	15104.3	14736.7	13965.3	16507.7	11036	9626.3	10667.1	13885	10922.7	11672	16942.7	17771.7	13494	13092.7	42456.3	46496	45297	45805.4	45191.7	30041.5	35417.6	36847.7	36684.9	34042.4	10634.2	17142.7	15279.6	14255.3	16280.7	45263.7	45115.8	43599.1	46597.5	48542.9	30810.2	32503.9	31248	32281.9	35245.7
Heat+shock+70+kDa+protein+4L+OS+Homo+sapiens+GN+HSPA4L+PE+1+SV+3	95539.2	984.628	5	HS74L_HUMAN	3460.46	4191.23	3407.42	3820.1	3856.66	4294.49	2868.61	4202.53	3757.23	5274.91	2941.69	3930.29	3497.73	3340.38	5783.38	9745.5	9397.2	6442.13	9739.5	8030.83	7524.46	7897.19	3428.46	9092.94	9647.37	12911.9	11200.3	7780.91	7491.18	12715.6	5542.03	4671.45	5377.67	5255.77	4370.07	3410.59	6459.91	5385.05	6084.04	9376.05	10164.4	10802.8	8010.3	7893.05	10361.9
Putative+heat+shock+protein+HSP+90+alpha+A2+OS+Homo+sapiens+GN+HSP90AA2+PE+1+SV+2	39478.9	8558.62	11	HS902_HUMAN	5806.22	5160.14	3565.77	8334.72	4013.59	8487.41	5211.49	5292.55	9268.13	5678.91	7036.28	8643.23	7018.52	7913.94	7497.88	9999.16	5353.19	7233.3	7351.08	8670.86	32829.8	31640.6	30442.3	34388.2	15106.2	22611.8	22791.8	23510.2	23167.5	23389.7	18961.2	21922.6	21091.2	21655.9	21500.2	24484.3	24594.4	23840.6	25724	25666.4	20654.9	17438.6	17809.2	19148.5	18395.3
Putative+heat+shock+protein+HSP+90+alpha+A5+OS+Homo+sapiens+GN+HSP90AA5P+PE+1+SV+1	38966.2	2602.68	4	HS905_HUMAN	27885.5	23867	26686.5	10381.1	21241.2	23796.5	20669	15260.1	20996.3	14511.6	4192.2	3650.62	2596.2	3607.74	4270.94	11203.5	23649.2	26583.4	15857.8	13901	2089.52	2133.44	2247.46	3011.26	2204	54823.8	55593	55370.5	57076.9	54255.9	37081.4	30222.7	30358	40383.6	47519.5	1527.55	1709.86	1494.82	1584.53	1999	45935.6	46846.8	46515.5	46467.5	46445.1
Heat+shock+protein+HSP+90+alpha+OS+Homo+sapiens+GN+HSP90AA1+PE+1+SV+5	85059.1	15804.3	35	HS90A_HUMAN	97201.7	97878.7	101019	103110	99634.7	108729	107489	107536	110829	112544	81751.2	82224.3	79629.2	75039.9	83360.5	92957.3	96071	97132.3	94651.2	99176.5	201761	202785	199804	202374	199808	181325	184984	186825	188759	172642	115589	109101	108123	119000	106286	226640	227975	213081	222481	218173	167463	167189	161552	165894	157338
Heat+shock+protein+HSP+90+beta+OS+Homo+sapiens+GN+HSP90AB1+PE+1+SV+4	83606.5	17846.6	30	HS90B_HUMAN	136707	140021	142260	140647	136448	141783	143483	146170	144167	134235	97105.6	99264.8	98752.7	100478	103882	125860	129789	131978	134357	128052	298788	294141	265027	263399	250586	272899	276474	274463	242453	256188	143883	144152	138685	123944	135811	248183	237728	238223	281678	263841	263314	257832	270439	245776	268911
Heat+shock+70+kDa+protein+1A+1B+OS+Homo+sapiens+GN+HSPA1A+PE+1+SV+5	70337.5	18031.1	28	HSP71_HUMAN	85633.7	85200.7	88040.7	85393.2	85608.1	74983.3	80795.7	82930.3	78511	79942.6	55291.7	59628	58890.7	60071.3	64234.3	80836	80584.3	80359.3	81827.3	81404	227313	221615	221836	222685	218406	181383	154124	186051	186381	178651	84150.3	89649	75243.3	76266.7	78769.6	228959	228029	223256	225568	225379	174325	185131	180193	169802	172523
Heat+shock+related+70+kDa+protein+2+OS+Homo+sapiens+GN+HSPA2+PE+1+SV+1	70306.2	13684.3	22	HSP72_HUMAN	22228	15674.7	16091.6	19477.2	28059.4	26932.8	19648	20652.8	20528.9	31922.2	22671.1	27427.7	28223.9	26724	25065.3	28601	22455.5	24109.9	23457.6	32677.6	39526.1	29360.8	28217.9	27613.8	44544.1	13846	17573.8	19070.1	19229.4	18574.5	24167.4	28685	29102.2	28639.5	25083.3	35950.5	24470.1	17054.2	23725.5	33445.2	18963.5	19576.1	15363	12820.1	14343.9
Heat+shock+70+kDa+protein+4+OS+Homo+sapiens+GN+HSPA4+PE+1+SV+4	95186.5	2658.97	23	HSP74_HUMAN	27847.7	30432.3	30532.7	27785.3	31163	30153	31088	29117.7	32113.7	31019	27048.7	25926.3	26444.3	30201.7	29705	30717.3	30644.3	33391.3	29711	30350.7	49526.3	51188.3	48712.7	50360.7	50266.7	48322	44651.3	46753	47263.7	47319.3	32720	33478.3	34343	34287	31484	48111.5	50667	50378.3	49824.3	49239.7	49676.7	52338.3	52277.7	51651.7	46874
Heat+shock+70+kDa+protein+6+OS+Homo+sapiens+GN+HSPA6+PE+1+SV+2	71484.5	5825.35	15	HSP76_HUMAN	20622.3	21752.2	28345.3	20186	21479.4	21061.5	21972.4	27105.2	18818.4	20087.1	17772.8	18595.6	20361.8	25100.5	24233.6	24165	22370.1	31010.1	29033.4	24111	27713.9	30540.3	22125.3	32133.2	29855.5	32680.6	31869	28338.8	27554.8	32875.3	27927.4	29602.7	28644.3	28380.1	28563.1	26415.5	22605.4	25108.5	21935.8	24659.3	16616.7	21985.8	21444.4	13726.7	17672.8
Putative+heat+shock+70+kDa+protein+7+OS+Homo+sapiens+GN+HSPA7+PE+5+SV+2	40472.6	7099.37	8	HSP77_HUMAN	17228	24488.3	24671.7	24357.6	19403.6	16822	19819.3	25817.8	21277.3	25183.5	13576.8	14314.9	11006.5	15636.1	20911.7	17381.1	22942.3	26840.3	21795.1	33081.8	23291.9	34034.7	23757.7	32414.4	24912.5	32639.1	32019.2	26854.6	26228	31463.4	24490.6	23810	29253.7	27456.2	24527.7	37868.1	26164.8	26597.5	27728.9	30020.7	28078.6	17710.6	19781.2	17208.4	38345.3
Heat+shock+cognate+71+kDa+protein+OS+Homo+sapiens+GN+HSPA8+PE+1+SV+1	71126.3	27386	32	HSP7C_HUMAN	277920	267473	268693	269298	263022	256627	228347	246667	244852	253986	180907	182869	179898	177092	195949	262558	266521	264217	256454	257711	584746	573760	560449	579210	573773	503897	486767	504051	479868	474958	262427	270851	267891	268747	265293	550812	564484	551359	530091	567890	619326	621499	573152	521775	540612
Heat+shock+protein+beta+1+OS+Homo+sapiens+GN+HSPB1+PE+1+SV+2	22839.6	18317.2	8	HSPB1_HUMAN	139809	143032	135131	132826	145927	156787	144076	151158	148267	172073	150184	159467	159168	171129	164819	156961	143149	137627	147947	144132	149286	146526	146734	144558	146589	122441	118447	120338	114751	111465	161505	163570	157750	157325	168800	151643	155855	148244	148271	144224	97401.3	101043	98935	102258	99335.7
Hypoxia+up+regulated+protein+1+OS+Homo+sapiens+GN+HYOU1+PE+1+SV+1	111564	1621.36	20	HYOU1_HUMAN	73310	64241.7	60964.3	62152.7	56945.3	74329.7	57504.7	51626.3	54047.3	55644.7	90737	82420.7	72431	71262	56246.3	72636.3	58648.7	65473	64616.3	56565	64565.3	66405.7	66208.3	63870.7	62498.7	65942	65904	67244	60642.7	64881.7	56139	58013.7	58278.3	56525.3	53570.3	56560	57732	59171	57887	58466.3	51826.7	53021.7	56066.3	53465	54843
Eukaryotic+translation+initiation+factor+2+subunit+3+OS+Homo+sapiens+GN+EIF2S3+PE+1+SV+3	51679.8	783.223	4	IF2G_HUMAN	30141.3	29955.3	36072.7	29464	28882.7	29476.3	26468.3	29979.3	24547.3	26517.7	13195	28666	24200	25934	23948	25219.3	30068.3	28714.3	28431.3	24435.7	28145.7	41235.7	29970.3	34443	35867.3	31812.7	27965.5	28542.5	35953.7	32400	24511	25596	28433.7	29684.3	30580.3	29592.7	29054	30620.3	34736.3	31017.7	37113.3	30133.3	31309	31978.7	30448.3
Eukaryotic+initiation+factor+4A+I+OS+Homo+sapiens+GN+EIF4A1+PE+1+SV+1	46382.2	11416.6	23	IF4A1_HUMAN	103374	107178	110592	95213.7	97380.7	95842.7	104858	108762	102054	92933.3	70867.4	77249.4	78219	71436.3	77640.3	90561.1	99276.4	109658	109928	88875.7	94979.7	91126.3	98707	89098.3	98167	100194	123777	129311	120571	119215	107328	99777.8	99328.5	89884.7	102011	117063	92969.2	101996	103314	104968	100655	103065	101049	93979	119372
Eukaryotic+initiation+factor+4A+II+OS+Homo+sapiens+GN+EIF4A2+PE+1+SV+2	46630.5	6406.99	13	IF4A2_HUMAN	48674.2	45952.9	45351.1	47495	40124.3	46271.7	41571.9	16980.3	39753.4	36366.2	17779.3	32947.6	37919	31669.3	37372.3	38727.7	43465.2	42371.4	41506.9	38976.1	43358.8	40225.5	40092.7	40840.5	41829.5	32693	29166.9	30575.3	30914.7	29205.7	42774.9	41624.8	41581	40036	43523.4	35395.9	32768.6	33038.6	33286.7	34001.4	35406.7	37682.7	33288.8	35738.4	35311
Eukaryotic+initiation+factor+4A+III+OS+Homo+sapiens+GN+EIF4A3+PE+1+SV+4	47156.3	2608.15	8	IF4A3_HUMAN	27120	29321.3	29795.3	30041	30980.7	26591.3	24338.9	23838.3	25428	25516	26750	24442.7	26303.7	25494.3	29340.7	30753	34249	30728.7	32127	31806	41448.3	38714.7	38977	37348.2	38217.3	32348	28969.7	24801.5	33501.3	25551.7	35416.3	34719	38545	34148	29483.3	38590.3	37593.3	41183.3	40194.7	39521.7	33066	39678.7	43370.3	35222.7	31353.3
Eukaryotic+translation+initiation+factor+4H+OS+Homo+sapiens+GN+EIF4H+PE+1+SV+5	27442.1	10900.1	3	IF4H_HUMAN	13176.3	11061.5	9825.5	10973.7		7276.5	9898.5	10688				13822		8425	7058	12039.5	15345	3017		15980	22461.3	21316.3	20948	20462	1231	16174	14121	21301	14041.7	12961.7	13893		18748.5			10387.3	20648.3	16990.7	33594	21864.5	22807.3	25831	18814.5	15929.3	17619
Eukaryotic+translation+initiation+factor+5A+1+OS+Homo+sapiens+GN+EIF5A+PE+1+SV+2	17060.4	15685.7	6	IF5A1_HUMAN	63093.7	67251	68298	70816.7	70921	65873	74774.7	60805.7	72990	74456.3	53821.7	46537	47047	54718	57093	64132	63440.3	54245.3	68626.3	65761.7	58158.3	63105.7	63539.7	61244.7	59763	63152.7	62358.3	62603	65146	61815.3	78285.7	72571.7	73617.3	77109.7	77315.3	70719.7	74057.7	76505	74342	74951.3	51053.7	52894.3	53383	49072	52625
Interleukin+enhancer+binding+factor+2+OS+Homo+sapiens+GN+ILF2+PE+1+SV+2	43290.3	3053.09	12	ILF2_HUMAN	38233.7	36451.3	46068.7	40924	48809	42747.7	41305	38181.7	44690	45002.7	33356.7	40365.3	38904	40818.3	40797.3	30930.7	44003.7	49722.3	43289.3	44404.3	64910	63923.7	51375.3	57362.7	59614.3	60393	57074	54962	59317.7	58086.3	45107.3	56223.7	46805	50503.7	48343.3	63061.7	55589	64555	65136	62098	67472.7	67342	66936	65684.7	71920
Interleukin+enhancer+binding+factor+3+OS+Homo+sapiens+GN+ILF3+PE+1+SV+3	95737.7	802.756	11	ILF3_HUMAN	38711	36107.7	38423	51236.3	49919.7	33033	31045.3	46655.3	40233	33779.3	29227.3	34341.3	30566.7	30987	28145.3	37928.3	49984.3	37566.7	44407.3	51082	64145.3	65050.3	63530	65153.7	58645.7	70100	53438.7	60587	58423.3	59524.3	45958.7	45164.7	46581	45861.3	46084	60942.7	71347	67706.7	64368.7	70389.3	44814.7	30117.3	74705	35209	39054.3
Importin+subunit+alpha+2+OS+Homo+sapiens+GN+KPNA2+PE+1+SV+1	58204.2	3587.41	6	IMA2_HUMAN	11799	12467.3	11886	13215.7	18718.3	21125.7	9702	17995.7	15814	21024.7	9075.33	10649.5	10906.3	13317.3	8865.67	14218.7	16719	18413.3	13399.7	20550.3	27306.3	25654.3	27335.7	27425	32858.3	37097	23029.7	23058.3	25612.3	29840	19717	12970.7	12181	13473.7	18041.7	35914.7	25216.3	43408.7	32163.7	34401.7	37950.3	31130	36062.3	33431.7	30934.7
Importin+subunit+alpha+7+OS+Homo+sapiens+GN+KPNA6+PE+1+SV+1	60771	1116.45	3	IMA7_HUMAN	7947.33	11680.5	11187.5	9449	12868	6225	9123.33	8243.67	11832.5	12092	8313	9772	9622	9737.5	10122	7265.33	9105.5	10223	8615.5	10224	8979.33	9491.33	10095	14859	9866	11069	8674	8189	11887.3	10645	11812.5	9328	9282.67	8717	14327.5	8390.67	12654.3	9276.67	9701	6254.67	8985.67	9051	9737.67	9096.33	8311.33
Importin+subunit+beta+1+OS+Homo+sapiens+GN+KPNB1+PE+1+SV+2	98482	3145.37	21	IMB1_HUMAN	37922.7	37153.3	36289.7	39276.3	64337.3	41149.7	41228.3	40941	36882.7	44077.3	33437.3	35223.7	33644	32932.7	37937	34811	38442	41321.7	39842	38182	65799.7	62679	61547	64278.7	59595	52352.3	39902.3	41854	41485.7	35024.7	38535	42024	61796	63406.7	61789	47695.3	57755.7	54767	56712.3	56095.7	48604.7	50059	48470	49126	52722
Importin+5+OS+Homo+sapiens+GN+IPO5+PE+1+SV+4	125113	1627.2	16	IPO5_HUMAN	45323.7	55782.7	54760.3	54874.3	43688	46234.7	44837.7	42086	38704.3	61588.3	29536	36468.7	50714.3	37387.3	53698	50722	59162.3	40287.3	56981.3	56779.3	48409.7	54113	56071	48495.7	49859.3	24073	42268.7	34102	40648.7	40203.3	57590.3	38747	44671	58699	60869	50728	36836	52383.3	33026.7	34403	30156	29348.7	49105.3	43934.3	41956.7
Importin+9+OS+Homo+sapiens+GN+IPO9+PE+1+SV+3	116933	639.729	2	IPO9_HUMAN	6169	9721.5	8690	9113.5	9796	8130.5	10532	9970	10149.5	10437	8454	9348.5	8239	7413.5	7637	9861	7948.5	6326	7712	8059.5	9332.5	9606.5	9249.5	9777.5	10411.5	8109	12115.5	9552.5	12109.5	11419	9228.5	9107.5	8832	9918.5	9672	8134	8368	8238	11758.5	12257.5	12171.5	12765	12896.5	13619	12970
Ras+GTPase+activating+like+protein+IQGAP1+OS+Homo+sapiens+GN+IQGAP1+PE+1+SV+1	189880	2162.13	50	IQGA1_HUMAN	49553.3	54144.7	53554.7	49638.7	53246	49614.7	53521.3	53913	49041	59890.7	46666.7	42556.7	42487	44381.7	60551	55615	50656.7	52439.3	42605.7	46445.7	58317.3	68371.7	55071.3	48704.3	46496.7	86734.3	85130.3	79996	80139	80592.3	50876.3	49456.7	51891	52941	50654	90268.7	60467	69536	72339.7	68944.7	100158	135302	91116	133452	135657
Integrin+beta+1+OS+Homo+sapiens+GN+ITGB1+PE+1+SV+2	91723	1657.95	16	ITB1_HUMAN	64738.3	69210	68588.3	71955.7	66181.7	74245	79393.7	78767	76504	79433.3	60080	64462.7	64596	56483.3	69682.3	61471.7	64688	67956.7	68422.3	70546.7	41078.7	36743	32044.7	39647.7	37949	24468.3	25213	27062	24697.7	17796	73634.7	73637	66078	67622.7	68872.7	42492	37965.3	41666.7	49503	50014	24369.3	31492.7	30945.3	28437	27344
Keratin+type+II+cytoskeletal+2+oral+OS+Homo+sapiens+GN+KRT76+PE+1+SV+2	66411.1	672.655	2	K22O_HUMAN	13577.9	8782.15	9543.9	10763.8	10735.1	14432.1	15427.6	14403.9	12845.7	15106.4	10324.5	9909.48	9516.81	9852.89	9878.63	8460.72	10442.5	9525.3	8512.62	11112.2	9627.47	8533.95	15887	9548.41	2502.73	1238.91	1376.35	1269.98	1100.68	1651.91	9846.35	10270.2	11343.6	9445.05	9553.78	11206.1	11043.3	10403.2	10985.1	11384.7	5084.27	8958	7572.91	8529.84	5334.53
Keratin+type+II+cytoskeletal+1+OS+Homo+sapiens+GN+KRT1+PE+1+SV+6	66209.9	1228.26	4	K2C1_HUMAN	20642.7	10357.5	22073.7	9089.9	6331.17	43955	43889.7	54144	44172.7	50031.8	16638.5	23042	22890.7	25665	18761.2	27687.7	20930.7	11834.9	25304.7	18195.9	3425.52	17035.3	16765	18182.5	29881	12146.4	2109.75	2718.06	9489.07	16847.3	10834.1	11475.6	10845.6	11208.7	11150	15892.8	2293.02	2192.38	1921.49	2208.52	10855.2	13692.1	9116.17	1877.06	1989.77
Keratin+type+II+cytoskeletal+3+OS+Homo+sapiens+GN+KRT3+PE+1+SV+3	64588.2	808.659	3	K2C3_HUMAN	21297.8	21795.7	17738.2	20140.2	18055.8	27058.5	27217.1	27127.5	24107.7	25336.9	19535.7	19159.6	18602.7	14273.2	18113.5	15871.9	18743.3	17361.7	15918	18748.9	17741.9	11204.7	17188	17795.5	3709.76	1238.91	1376.35	1269.98	1100.68	1651.91	18310	19210.6	18683.9	17527.9	17946.7	20486.6	20182.4	18829.3	14625.1	20729.1	8802.4	16624.4	13837.6	15733.8	7042.73
Keratin+type+II+cytoskeletal+6C+OS+Homo+sapiens+GN+KRT6C+PE+1+SV+3	60310.2	580.483	2	K2C6C_HUMAN	39685.3	39404.5	41565.5	42729.4	35647.2	44004.6	41305.1	40946	38590.8	35538.3	4382.62	2087.25	2109.9	2001.92	1947.89	42182.7	41191.8	42261.1	41488.2	40373.8	36582.8	32988		31464.1	31328.7	19729.5	19510.1	19537.2	19945.7	17632.5	1621.73	1559.84	1605.57	2671.85	3984.3	1312.76	1298.3	1347.97	1405.65	3337.04	1049.98	992.702	2456.72	1019.06	945.316
Keratin+type+II+cytoskeletal+78+OS+Homo+sapiens+GN+KRT78+PE+1+SV+2	57664.3	744.019	2	K2C78_HUMAN	9297.03	8644.14	24493.8	19030.4	24405	33781	22898.3	34575.9	22757.8	20429.2	6107.12	8568.15	9748.76	11387.5	19280.7	26686	22926.2	26333.4	27673.4	22165.2	16067.5	6193.11		3729.69	14306.8	28736.7	23449.8	8169.93	10028.9	17339.7	25973.9	21662.4	26272	26855.1	27502	18945.8	23193.8	30658.7	21348.2	20276	34115.4	34216.2	30338.5	24362.4	23895.8
Keratin+type+II+cytoskeletal+79+OS+Homo+sapiens+GN+KRT79+PE+1+SV+2	58120.8	738.302	2	K2C79_HUMAN	4620.57	4566.82	4537.3	4892.79	5162.94	4798.1	2142.2	4685.29	4828.21	5427.56	3558.51	4008.2	4116.75	3913.34	1728.73	4549.23	2127.29	4872.26	4722.8	4960.02	6831.53	9203.71		6685.91	9359.66	9454.04	6899.56	6867.23	3176.5	7044.55	6199.72	6566.9	8714.36	8387.92	8342.65	9420.95	10905.8	6869.99	10938.5	10428.6	12262	11999.3	11048.7	12862.1	11269.1
Keratin+type+II+cytoskeletal+7+OS+Homo+sapiens+GN+KRT7+PE+1+SV+5	51442.8	1542.57	5	K2C7_HUMAN	11471.6	14420.9	19382.8	17078.2	12866.1	16495.6	17903	19083.1	23889.6	11612.7	12128.7	16538.4	13071.2	11056.5	10631.7	13717.6	7184.81	15569.6	11479.2	12319	18732.2	10584.4	19036	10941.8	17806.1	25534.1	22094.6	22989.2	26115.6	18981.6	12942.4	11862.1	10647.7	11306.3	10528.1	14319.5	15661.9	14026.6	15749.2	18634.8	16242.9	17577.5	22827.1	18619.8	22228.3
Keratin+type+II+cytoskeletal+8+OS+Homo+sapiens+GN+KRT8+PE+1+SV+7	53704.4	1504.26	4	K2C8_HUMAN	12245.2	11000.9	10328.1	4230.03	6490.81	3476.44	10059.6	10096.6	9218.19	9091.26	15093.3	13961.1	13075.9	12489.4	12135.5	12914.5	12986.1	11454.1	13008.2	13305	2856.81	2918.94	1384.72	2845.32	1176.98	8049.27	8302.12	9472.11	8366.14	8395.78	5784.11	5829	4651.67	4833.33	6957.11	3754	4261.56	4118.89	4334.67	4139.22	2140.93	1360.56	2167.15	2293.55	6584.18
6+phosphofructokinase+liver+type+OS+Homo+sapiens+GN+PFKL+PE+1+SV+6	85817	840.109	7	K6PL_HUMAN	24496	21082	18616	23050	26584	24423.3	17916.7	14622.7	12867	23771.7	24982.6	19690.7	22494.3	21653.7	18794.3	24562.3	21464.3	19440	14534	18311	15718.7	22617	16426.3	16041.3	13233.3	26355.3	23765	26060	23334.8	20368.3	27645	26276.7	28271	26480.7	24460	19162.3	31303	18485.7	18458.3	16239.3	24426.3	23407.7	21515.7	22914	25583
6+phosphofructokinase+type+C+OS+Homo+sapiens+GN+PFKP+PE+1+SV+2	86508.7	1269.41	7	K6PP_HUMAN	18388	23102	18948.3	16388.7	28161.3	25219.7	17267.5	18496.7	17947.3	32922.7	24020.7	22350	17096	21032	19741.7	18817	19448.7	16696	17611.3	23250.7	20337.3	21706.3	18577.4	15510	25635.7	14747.3	22837.3	24807.7	18909.3	23317.7	24627.7	29556.3	30501.3	25873.3	27706.3	19182.4	19946	25708	25908.7	25169	37182.3	31742.7	26252.3	30163.7	29961
Calcium+calmodulin+dependent+protein+kinase+type+II+subunit+delta+OS+Homo+sapiens+GN+CAMK2D+PE+1+SV	56996.8	1055.42	2	KCC2D_HUMAN	29882	30502	31567	30184	30068	30098.5	27854.5	28675	31424	28070	29626	25438	30415	30993	31989	28514	29270	29280.5	30030.5	27182	23124	20499	22263	21249	11637	18508	20709	19824.5	19383.5	17921	35906	31976	31841.5	33125.5	31994.5	24259	22509	24237	22187	15334.7	14587	18286			19498.5
Creatine+kinase+B+type+OS+Homo+sapiens+GN+CKB+PE+1+SV+1	42929.5	2550.4	5	KCRB_HUMAN	10757.5	14001.5	5837	10058.5	10222.3	11811	8225.5	8376	8371.5	9107	7773		4080.5	4807	5630	6871	5817	7906.5	4896	5460	28090.7	15409.7	21786.5	24848.3	20980.3	64571.7	64460.3	65136.7	65421.7	62989	9922.67	7166.5	12156.5	11958.7	14141	20309	18035	11519.3	17932	16707.7	62027	61695.7	59890	58836	60028
Kinesin+1+heavy+chain+OS+Homo+sapiens+GN+KIF5B+PE+1+SV+1	110426	908.428	5	KINH_HUMAN	15530.3	9145	14143	17492.3	17259	12976.5	10587.7	15890	13863	16461.3	3729	15459	8788.67	10034	9931.67	6476	10505.7	15264	18840.7	16590	17395	15955	15857.7	11922.3	16323	13043.5	11934	10897	11678	12637.3	13619.3	11546.7	15170	16257	14553	12254	11606.7	13487.5	10430.5	13893.7	13967.5	13366.3	14690.3	15053	14542.3
Pyruvate+kinase+isozymes+M1+M2+OS+Homo+sapiens+GN+PKM2+PE+1+SV+4	58507.3	30098.2	34	KPYM_HUMAN	470211	482255	467965	469087	435206	448310	470800	462823	440027	448231	424589	486471	468764	458538	465584	478180	438446	471725	464210	467337	367842	367187	367825	354141	360680	288413	288437	287944	294760	288184	456223	470758	436344	450539	419093	423310	412016	398483	423699	413398	367259	366314	360860	361629	325649
Pyruvate+kinase+isozymes+R+L+OS+Homo+sapiens+GN+PKLR+PE+1+SV+2	62229.5	1686.17	3	KPYR_HUMAN	6997.36	6326.82	8708.2	3919.95	1441.66	9786.67	8100.8	11179.7	6998.72	5793.14	1818.11	6956.75	9264.33	6945.11	6451.7	7380.81	8867.89	5920.7	7779.04	8185.53	10952.3	17819	12223.6	16401.6	10576	8045.05	9660.49	9345.33	10030.7	9104.17	6134.97	6344.23	9302.45	9006.17	7984.51	11016.9	11664.4	12411.3	16815.3	9145.37	10176.3	10558.6	6547.33	5551.99	5568.07
Keratin+type+II+cuticular+Hb4+OS+Homo+sapiens+GN+KRT84+PE+1+SV+2	65983	1393.95	6	KRT84_HUMAN	10977.1	7810.23	8345.53	4442.16	17183.5	6300.97	6007.15	8814	20355	7908.9	14956.2	20456.2	6254.94	6928.79	9104	4656.84	6550.48	7259.11	7953.86	14003.2	16044.8	16594	19345	8170.43	14034	6968.67	9207.67	9089	4824.97	10554.7	7466.67	9658.53	14428.8	18725	21055	3122.16	11354	7031.07	12429	7867.03	10007.7	14750.3	8131.98	11191.1	11671.3
Keratin+type+II+cuticular+Hb5+OS+Homo+sapiens+GN+KRT85+PE+1+SV+1	57341.9	851.291	2	KRT85_HUMAN	2132.75	2117.66	2233.79	5391.67	1915.73	2546.17	2389.97	2369.2	5471.46	2056.3	1945.45	1207.84	1220.95	3375.49	1127.2	2485.6	2427.21	2490.22	5446.84	2379.01	36582.8	32988		31464.1	31328.7	19729.5	19510.1	19537.2	19945.7	17632.5	43740.2	42071.1	43304.5	43092.2	36724.2	31415.2	31069.2	32257.7	33638.2	33289.3	21558	20382	20643.6	20923.2	19409.1
Keratin+type+II+cuticular+Hb6+OS+Homo+sapiens+GN+KRT86+PE+1+SV+1	55154.5	908.813	3	KRT86_HUMAN	20308	17417.1	16289	17311.6	16239.8	15547.2	13632.9	13398	13100.9	14575	14353.3	14293	11761.4	9802.94	11514.4	14927.4	13934.7	12816.9	12241.9	4969.48	16528.8	15992.9	25417	16281	14991.1	26614.5	25530.6	26310.1	19326.6	24633.7	4964.85	18093.7	16214.2	11685.8	17263.2	16426.7	20310.6	17071	14651	16635.1	20077.4	8039.92	8143.11	8253.39	7656.14
Lysosome+associated+membrane+glycoprotein+1+OS+Homo+sapiens+GN+LAMP1+PE+1+SV+3	45395.7	2429.68	3	LAMP1_HUMAN	35026.5	23969.7	25073.3	29404	21529	36289	22787	20068	29891		20563.7	35790	34969.5	33434.5	24461.3	25680	34210	33147.5	33990	34037.5	28735	25744	24414.5	31807		23325	15163	17299	15545.5	22929	31665	17943	15441.5	29825	34706	19654	33159	39021	22444	20342.5	21136	24922	14951.5	22328	15894.5
L+lactate+dehydrogenase+A+like+6A+OS+Homo+sapiens+GN+LDHAL6A+PE+2+SV+1	36849.6	3286.99	4	LDH6A_HUMAN	4902.32	7178.86	8543.68	8866.26	13384.8	8377.53	11224.9	7745.42	4794.34	10367.7	7458.11	9651.34	8098.24	7880.72	5560.85	8532.73	9942.49	11918.1	7976.43	4349.95	12029.1	11824.9	8344.91	8388.36	11221.8	5717.02	6717.6	4334.94	7847.5	3713.76	7544.98	12482.7	11531.9	6890.79	12138.6	2497.83	2392.96	5409	2447.7	2220.55	3446.49	2350.2	2229.5	2179.7	2350.62
L+lactate+dehydrogenase+A+chain+OS+Homo+sapiens+GN+LDHA+PE+1+SV+2	36973.9	47138.5	19	LDHA_HUMAN	328420	333131	326636	326441	310601	289784	293337	325059	323223	267148	254538	259273	259555	256958	243214	308024	310720	314362	319765	288109	211961	200049	196827	208595	190083	168303	179588	186638	175889	179451	331007	305280	313575	311990	278605	302396	346419	342292	366954	342931	226632	247825	253058	269211	261631
L+lactate+dehydrogenase+B+chain+OS+Homo+sapiens+GN+LDHB+PE+1+SV+2	36923.7	16040.9	13	LDHB_HUMAN	91066	84697.8	86115.9	89541.5	87755	92932.7	84335.1	88767.7	88524.7	95335	78039.4	74499.1	80415.2	82049.2	78927.9	86019	88749.3	85675	85396.5	80092.1	117660	118539	109252	109338	108787	125488	130985	131325	133434	128720	84226.3	93133.3	91506.7	92126.3	86379.3	134045	139632	135220	137446	144406	126283	126674	128633	128497	131742
L+lactate+dehydrogenase+C+chain+OS+Homo+sapiens+GN+LDHC+PE+2+SV+4	36653.5	2958.07	2	LDHC_HUMAN	7098.03	6178.26	5725.76	6453.63	4330.5	6926.68	6604.48	6511.92	6728.42	6273.87	7493	7240.22	7591.01	7547.15	7555.93	8263.09	6770.93	4729.4	6362.41	4990.15	11259.3	9294.86	8753.88	13401.7	11743	5485.65	7061.99	6521.1	5549.26	5334.75	4955.14	3476.97	4440.98	3300.96	5430.37	7629.05	5549.92	8182.79	7789.03	5710.95	8995.79	10111.7	6946.39	9732.39	6552.3
Galectin+1+OS+Homo+sapiens+GN+LGALS1+PE+1+SV+2	15057.9	68671.7	7	LEG1_HUMAN	501362	496329	513721	495053	416387	475335	477474	480566	478283	455335	426549	433813	434346	421075	418650	552339	562913	558119	554538	518273	413355	439182	418960	505856	408076	317741	374039	375124	327467	340707	451916	451827	442264	435374	513405	428957	495053	507694	513984	509367	247295	247650	244112	237751	241181
Prelamin+A+C+OS+Homo+sapiens+GN+LMNA+PE+1+SV+1	74424.7	13289.5	39	LMNA_HUMAN	363555	284659	352167	363846	346193	388520	367535	338975	412890	362194	295217	287717	286921	289349	297401	296657	297212	314896	289341	303453	291904	320470	331467	319412	301203	252146	236853	257791	243557	241610	354406	341595	351745	346880	331017	355942	350310	360424	362755	362249	234289	253467	230420	232565	217833
Lamin+B1+OS+Homo+sapiens+GN+LMNB1+PE+1+SV+2	66693.6	899.83	6	LMNB1_HUMAN	25142.7	35845	22552	22647.3	32143.7	29070	54719.3	16599.8	17345	41526.7	19980.3	19832.3	24848	21619.3	32752.7	25082	30943	38915	14163.3	21326.3	34253.3	35221.7	32249	38436	35320.7	37958.7	38860.3	38494	33350.3	34831	34615	31900	32410.3	31457.3	27969.7	42618.7	38721.7	35822.7	15017	9203.41	28528.2	28000.3	28750.7	28744.3	29830
Lamin+B2+OS+Homo+sapiens+GN+LMNB2+PE+1+SV+3	67803	435.179	2	LMNB2_HUMAN	1191.64	9187.84	9878.71	9616.75	10333.6	3871.95	10593.8	10385.2	12191.3	11648.6	9081.21	1597.46	11632.8	10099.3	10109.7	9667.03	1838.03	9885.24	9997.11	19669	8335.74	8863.33	10618.8	10397.6	2099.06	9458.01	9731.92	9514.89	9509.47	18177	12505.1	11510.4	12418.9	12352.9	10834.8	8179.18	6846.58	6245.01	6904.3	9515.46	11070.2	4774.78	5114.93	5218.28	11399
Lon+protease+homolog+mitochondrial+OS+Homo+sapiens+GN+LONP1+PE+1+SV+2	107003	1031.36	4	LONM_HUMAN	7000	7401.5	8630	10061	9159			9663.5		15945.7	7320	8852	8442	8913.5	7205.5	7871	7578	7187.5	9364	21996.5	15255.7	12520.3	9474	13920	10002.3	24864	27890.7	28957	26328.7	26153	7144.33	8668	2598	6767.33	11038.3	23884	11694.7	11998.3	11960.7	14344	25192.7	16113.3	17916	19878.5	16132
Leucine+rich+PPR+motif+containing+protein+mitochondrial+OS+Homo+sapiens+GN+LRPPRC+PE+1+SV+3	159103	739.016	5	LPPRC_HUMAN	11700	5241.5	6821.67	10404.7	8601.67	14222	11452.7	8134	9265.67	15241.7	8882.5	8882.5	9990.5	6254	5067.5	10465.5	10184	11503.3	7728	7621.67	23122.7	14879	21390.7	15344	21826	26730.3	22834.3	16940.7	20089.7	21468.3	8379	9373.33	11007.7	13964.7	8530.5	25425.3	27375	25127	25922.3	27340	28529	19666	26470	26331	27650.3
Leucine+rich+repeat+containing+protein+59+OS+Homo+sapiens+GN+LRRC59+PE+1+SV+1	35329.7	4278.44	8	LRC59_HUMAN	240206	218367	202446	213169	399259	246176	248904	245268	237678	322167	243067	228182	227100	224851	219785	260997	237841	230338	216239	212317	203559	191544	204318	209468	228350	176753	168494	171300	157354	157783	401449	249784	216065	210845	266812	225334	238269	213175	208562	213636	151689	129713	136756	122185	140032
Microtubule+associated+protein+4+OS+Homo+sapiens+GN+MAP4+PE+1+SV+3	121518	1925.54	23	MAP4_HUMAN	56203.3	51048.7	52115.7	43877	47275.7	50591	46936	43488.3	39963	51578.3	37909.7	40534.7	46005	43392.7	45720.7	43950	52304.7	45659	43201.3	47571.3	39039	42778.3	44496.7	47423	42754.7	32003.3	26610	32002.3	33463.7	29852.3	43743.7	38779	43902.3	47904	46757.3	32277.3	35525	33815	31391.3	35704.7	28420	28032.3	24268.7	27274.3	29464.3
Myristoylated+alanine+rich+C+kinase+substrate+OS+Homo+sapiens+GN+MARCKS+PE+1+SV+4	31725.8	4345.09	4	MARCS_HUMAN	56257.7	54946.3	51663.3	51916.7	49245.7	64910.7	59116.7	60058.7	60835.3	56584.3	67863.3	68857	51677.3	68056.3	66330	58236.3	56563.3	57423	55872.3	53938.7	17150.5	17823	20078	19838	20211	8233	9161.5	11774	5061	7853	54710.3	54206	55887.7	56149	48762	22624	24367.5	21606	23876	20323	3597	6902	4260	4516	7824
Microtubule+associated+protein+RP+EB+family+member+1+OS+Homo+sapiens+GN+MAPRE1+PE+1+SV+3	30170.2	1466.27	3	MARE1_HUMAN	14988.3	16489.5	16377	13543.7	16621	17339	15662	16335.3	16224.5	17712	12613	14077	14156.5	13839.5	12798.5	14533	13788	14167.5	15207	15203	16379	18139	19725.5	20987	18824	27744.5	26175	27410.5	30308.5	28634.5	15311.7	16164.5	15132.5	18565	15986.5	11494.3	18769.5	18435	19649	15295.3	20758.5	21827.5	21158	18303.5	21462
Matrin+3+OS+Homo+sapiens+GN+MATR3+PE+1+SV+2	95136.6	1989.66	9	MATR3_HUMAN	38183	42433.3	40750.3	46148.3	43168.3	41250.3	41919.7	36619.3	44359	44310.3	31257.7	34584.3	38773.7	31018.7	38122	31704	34158.3	41237.3	40755.7	32376.7	51545	49488	52083	52774.7	56753.3	35686.7	36160.3	36403	37336.3	35500.7	41369.7	47468.3	43646.3	35258.3	42422.3	52107.7	55060	56701.3	48596.3	50374.3	41213.7	40857.7	41685.7	40877	26315.3
Malate+dehydrogenase+cytoplasmic+OS+Homo+sapiens+GN+MDH1+PE+1+SV+4	36654.3	4833.01	14	MDHC_HUMAN	51159.7	46615.7	52213	57050	60559	51564.3	45993.7	53926.7	51683	52354.3	32432	37999.3	38763.7	45260.3	47917.7	42051.7	49553.3	51127.3	51587.7	56625	73949	72837.3	83538.3	71484	73315.7	91956	87712	92617.7	93461.3	86293.7	56511.3	51534.3	54105.7	49864.7	54044.7	83212.3	80274.7	81782.3	71000	76604.3	114657	112092	107306	105643	102449
Malate+dehydrogenase+mitochondrial+OS+Homo+sapiens+GN+MDH2+PE+1+SV+3	35959.6	14388.8	17	MDHM_HUMAN	93724.7	66724	78586.7	76617	81103.7	63508.7	74424.7	81396.7	78950.3	75462	70927.3	68296.3	57288.7	95685	94912.3	85093.3	97976.7	75829	80017.3	85591	140539	142987	149690	141416	154255	209590	210480	215002	216141	207515	83320	79555	76717.3	75654.3	78962.7	129661	125870	133399	124831	121923	190152	200808	199959	192247	189308
Macrophage+migration+inhibitory+factor+OS+Homo+sapiens+GN+MIF+PE+1+SV+4	12647.4	20089.8	4	MIF_HUMAN	94754.7	107525	110856	107692	95052.3	81335.7	76972	100698	84154	89896	65694.3	75561	75746.3	91244.3	79955.7	87520.7	100193	105027	111715	119055	113242	102383	124015	120990	111431	135804	111291	131382	61544.5	125134	219761	149509	132416	123311	147856	88290.5	67170.7	97472.5	94425.5	65386.3	76663.7	68451	46665.5	57488	42298
Myosin+regulatory+light+chain+12A+OS+Homo+sapiens+GN+MYL12A+PE+1+SV+2	19851.2	26622.1	9	ML12A_HUMAN	43638	43530.2	44834.2	47660.3	53341.9	49996.5	52084.2	54531.9	52977.3	58272.7	58185.4	60153.9	61884.4	61174.1	62916.9	42428.3	43904.2	45260.5	46303.5	45502.8	46345.6	50839	49436.3	49933.9	48924.4	28379.7	25500.6	22903	26771.6	24374.2	45356.8	49324.2	54409.8	53490.1	53428.4	35645.6	32177.2	36692.8	38764	37972.7	20126	18629	18217.2	18959.8	18339.9
Myosin+regulatory+light+chain+12B+OS+Homo+sapiens+GN+MYL12B+PE+1+SV+2	19836.2	17808.8	9	ML12B_HUMAN	87275.9	87060.4	89668.3	95320.6	106684	65584.6	68323.3	71534.1	69494.8	76441.3	58185.4	60153.9	61884.4	61174.1	62916.9	65325.8	67598.3	69686.5	71292.4	70059.5	46345.6	50839	49436.3	49933.9	48924.4	38883.9	34939.2	31380.2	36680.6	33395.9	90713.6	98648.4	108820	106980	106857	54682.8	49362.1	56289.3	59466.7	58252.8	40251.9	37258	36434.4	37919.7	36679.8
Moesin+OS+Homo+sapiens+GN+MSN+PE+1+SV+3	67934.2	7637.72	29	MOES_HUMAN	117184	135484	140569	90481.5	132849	144092	120459	124981	130328	130079	112416	110790	118802	116693	106801	167958	146552	149297	143752	147106	108441	104006	104328	102712	105614	101685	100481	102643	106265	104045	141237	145441	94566.2	144662	148288	125608	114162	109083	119571	121705	88660.2	89671.3	86986.9	88516.8	87675.4
Phosphate+carrier+protein+mitochondrial+OS+Homo+sapiens+GN+SLC25A3+PE+1+SV+2	40551.2	1763.36	5	MPCP_HUMAN	63402.7	71552.7	64286.7	78641.3	82972.7	79324.7	69142.3	56207.7	64796.7	53733	57612.3	59930	56480.7	63269.3	65171	63087.7	70846.7	73737.3	62469	68069.7	104757	94999.7	106521	75963	93380.3	82635.3	83048.7	76802.7	84625.7	85560.3	78792.7	60237.7	62915	59703	58865.3	97680	79921.7	87342.3	85226.7	82855	103526	97588.7	99492.3	95965.3	86709
Major+vault+protein+OS+Homo+sapiens+GN+MVP+PE+1+SV+4	99612.1	6778.41	27	MVP_HUMAN	50671	49610	51873	67267.3	46976.3	55182	57187	67163	51260	69179.7	47108	47813.7	46654.3	47890.3	45113.7	43383.3	51985.7	49487.3	61591	49065.7	36192.3	40875.7	40026.3	39522.3	39758.7	25307.3	41936.7	43489.3	42872.3	37975.3	53814.7	53535	53284.3	56352.3	57049	58680.3	38035.7	53094.3	41457.7	44523	25003	24281.7	20460.7	23702.3	36399.3
Interferon+induced+GTP+binding+protein+Mx1+OS+Homo+sapiens+GN+MX1+PE+1+SV+4	75919.6	1626.67	4	MX1_HUMAN																					28064	30545	20421	27859.7	27830	6438				2544						50511	51115.3	54490.3	40507.7	53086.3	17351.3	20273.7	21636.7	17434	23236
Myosin+10+OS+Homo+sapiens+GN+MYH10+PE+1+SV+3	229969	1206.44	38	MYH10_HUMAN	30952.7	38209.7	36231.7	35654.3	28425.3	35089	39378.3	33920	23918.3	28719	24273.7	25841.2	30049.7	36855.7	25940.5	39049.7	36305.7	31089	28929.3	29543	26426.7	28506.7	27937	31440.3	26673.7	23065	20716	24127.3	25354.3	29757.3	39652	32123.7	32158	32468.3	30948	25796.7	42319	32823.7	34581.3	24968.7	40489.3	38357.3	36386.3	27557.7	32204.7
Myosin+11+OS+Homo+sapiens+GN+MYH11+PE+1+SV+3	228195	1261.61	20	MYH11_HUMAN	15809.2	18812.4	28873.4	28031.3	20087.3	15404.9	14152	13728.8	25777.2	23272.7	24891.7	16608.7	19010.3	15268.9	20666.7	16445.2	17197	19142.7	18387.4	15106	14815.9	13101.5	17508.4	15252	17741	8845.65	16338	18071.7	18261.7	12803.1	18256	16428.1	17083.3	17765.7	10033.9	18322	13819	21470.7	11614.8	21930	17994.3	15938.7	11189.7	14405	16864.3
Myosin+14+OS+Homo+sapiens+GN+MYH14+PE+1+SV+2	228840	869.396	15	MYH14_HUMAN	30881.3	37401.3	26601	28610.3	25305	37202.7	34331.7	27467.1	37197.7	22760.3	52366.7	25696	26862.9	26665.9	45673.1	35563	35275.7	32133.3	31974.3	28107.1	71100.7	67114	73101.7	71267.3	69628.3	63221	59516	58510.7	59799.7	58195.7	29623.7	27499.3	19986.7	20356.7	28842.7	62215	55478	63772	51227	63896.3	67110.7	62236.7	57515	63038.3	60059.7
Myosin+9+OS+Homo+sapiens+GN+MYH9+PE+1+SV+4	227787	10971	78	MYH9_HUMAN	201766	214066	210922	203640	195675	221270	222643	223503	218060	213695	198024	237412	233746	234793	240142	210059	215529	216167	212111	207545	131160	136941	131174	134290	130188	85922.3	91501.3	84786.7	87529.3	82448.7	209204	211172	205686	203261	195667	141799	141550	140645	146012	138732	113944	112329	112473	114001	118561
Myosin+light+chain+6B+OS+Homo+sapiens+GN+MYL6B+PE+1+SV+1	22878.1	9719.49	4	MYL6B_HUMAN	24919	22104.2	31632.8	22846.3	20918.9	16559.3	16297.5	19135.7	14812.2	22015.8	14918.2	20290.1	16510.8	17414.3	25161.3	22810.8	17214.2	22762.2	24325.5	25323.7	16131.3	15666.4	11039	11326.6	12963	15920.6	12777.7	14202.3	12775.2	14481.5	29804.4	28248.6	27970.4	28241	21301	19171.3	21165.3	18036.6	20368.3	17798.1	18094.2	19443.4	18915.9	17703.8	17631.7
Myosin+light+polypeptide+6+OS+Homo+sapiens+GN+MYL6+PE+1+SV+2	17101.2	30626.6	9	MYL6_HUMAN	218795	217923	219279	210091	202705	221740	207008	217401	218415	203419	213073	215198	216721	220057	213949	218107	219231	216843	212938	200847	176854	170312	175951	171935	164494	125104	116802	132669	120559	125426	211721	215566	210332	210313	207450	163041	162547	165174	164590	158807	66134.5	65317.3	75337.8	61560	60758.5
Myosin+regulatory+light+polypeptide+9+OS+Homo+sapiens+GN+MYL9+PE+1+SV+4	19884.3	23570.8	9	MYL9_HUMAN	20704	22334.3	23594	23555.9	16515.8	29353.5	30439.8	33403.6	31238.9	33056.7	33648.6	36245.1	38507.9	37394.5	42572.4	26711.4	29641.8	26621	27142.5	25626.1	7404.8	10211.9	8036.4	8036.87	6705.72	1860.89	1345.24	1368.71	1909.32	1459.29	19220.3	19899.6	19907.3	20856.3	15187.9	8341.55	7458.82	8936.26	9504.2	10408.9	10596.4	9762	9705.59	11443.9	8512.81
Myosin+Ic+OS+Homo+sapiens+GN+MYO1C+PE+1+SV+4	122537	1493.9	15	MYO1C_HUMAN	36414.3	30496	28482	34568.7	39043	29751.7	31782.3	30414.3	27970.3	29440.7	30782.7	39411.7	40492	39118.3	28693	37756.3	30184.7	28964	30216.3	33071.7	27158.3	30839.3	32148.3	32994	31432	11730.7	16659.3	16683.7	14811.7	22237.7	38707.3	45282.7	31614	34711.7	37267	23951.3	23959.7	24191.7	24413	23661.3	19336.3	20707	20551	15572.7	20374
Nascent+polypeptide+associated+complex+subunit+alpha+OS+Homo+sapiens+GN+NACA+PE+1+SV+1	23383.9	2341.84	5	NACA_HUMAN	45251.3	46919.7	41159.3	43450.3	54291.3	38237	52766.7	55453	55840.7	63780.3	37932.3	47194.3	33344	34136.7	38355.7	42128.3	46822	44490.7	40296.7	59598	65776.7	68584	74254.7	73968.7	71048	55401.3	58382.3	57008.7	54197	54475.3	60229.7	61093.3	62468.3	57910	55607	80150.7	77033	81690.3	78554.3	82173	27006.7	25726.3	29151.7	33626	34482.7
NADH+cytochrome+b5+reductase+3+OS+Homo+sapiens+GN+CYB5R3+PE+1+SV+3	34463	2652.27	10	NB5R3_HUMAN	57031.3	55428	51488.3	52843.7	53474	57985.7	63277.3	60479.7	55684.7	54437	54306.7	54607.7	56516.3	58399	61205.3	46205.7	52211	53441.7	57209	55556.7	62356	58652	62628.3	61999.3	58895	42058.7	42907.3	39316.7	44563.7	43244	53346.7	53469.7	45242.3	49437	41706	49412.7	50299.7	54409.7	54723	51076.3	37038	40115.3	48641.3	45439	47833.7
NADPH+cytochrome+P450+reductase+OS+Homo+sapiens+GN+POR+PE+1+SV+2	77146.1	865.741	2	NCPR_HUMAN	11185	11259	10880.5	10589	14424	9126	11375	11012	1552	10972		10412	8777	8982	8676	9810	9185	10081	9076	11404	28530	29661	29605	30000	29911	19990.5	19652	20049	17330.5	33563	12430.5	7369.5	11334.5	11042.5	11548.5	15309.5	20119	21091	19570	26565	34596	22007	35254	16457.3	15384.3
Nucleoside+diphosphate+kinase+A+OS+Homo+sapiens+GN+NME1+PE+1+SV+1	17319.8	7026.85	9	NDKA_HUMAN	49112.6	45724.5	40900.1	46878.1	52114.1	32386.3	40285	22976.9	28748.1	31788.9	35959	31522.6	31845.3	36849.8	37553.3	50980.6	44191.8	43340.7	33900.8	41310.3	60835.3	61316.1	59557.9	56091.9	55026.6	62458.2	47603.3	56071.7	45200.3	60555.7	38591.3	47431.4	45365.3	52567.8	52519.8	63335.4	62870.1	61483	61864.2	60277.3	31546.4	51724.6	37880.7	36441.6	48993.2
Nucleoside+diphosphate+kinase+B+OS+Homo+sapiens+GN+NME2+PE+1+SV+1	17412.1	17785.3	12	NDKB_HUMAN	119047	121187	115147	105696	112128	118762	113903	108180	116629	110640	96374	94819.8	82195	93611.2	83930.7	107738	116635	104336	111111	110416	127201	126490	121686	124349	120141	134697	142915	122311	145433	140457	130225	129424	130058	126435	125209	111575	124744	128231	125915	105522	131733	127462	122954	125463	119614
Neprilysin+OS+Homo+sapiens+GN+MME+PE+1+SV+2	86198.4	573.626	2	NEP_HUMAN	29266	27045	31697.5	31120	34367.5	20990	20640.5	26775	28349	22182	17839	35509	22931	26246.5	44178	19720	31992	15925	30457.5	27523			15664				10750	9738	9287	9913	31449	31811	34560.5	32388	33993		12168		11039	1453
Nestin+OS+Homo+sapiens+GN+NES+PE+1+SV+2	177895	845.654	30	NEST_HUMAN	56392	54241	50707.7	58771.7	46958	50047.3	49296.3	47484.7	48204	50106.7	72254.7	62500.7	67516.3	62699.3	72248.7	53017.7	53848	54101.7	42383.7	57210	41269	30726	43649	42676.7	35526.7	28131.7	22566.7	30573.7	22267.3	30912.3	47169	51017.3	52148.3	49708.3	53593	50332.3	34439.3	49273.3	34715	39562.3	32697.7	34471.3	24390	28026	33020.3
Neurofilament+heavy+polypeptide+OS+Homo+sapiens+GN+NEFH+PE+1+SV+4	112707	1386.95	3	NFH_HUMAN	27853.9	17836.9	11630.2	20432.3	27006.3	21302.6	19327.5	18694.8	15650	16796	23148.6	10591.7	9531.1	13862.3	11014	22598.2	15818.4	20129.6	9783.71	13466.6	12757.3	10461.4	13287.9	4662.59	19535.6	5724.08	10816.7	6682.67	16477.7	13812	19040.7	17357.5	15959.2	15270.2	19882.9	11198.3	14853.7	12774.3	6846.67	8119.67	11186.8	11921.4	10308.5	7063.96	13042
Neurofilament+light+polypeptide+OS+Homo+sapiens+GN+NEFL+PE+1+SV+3	61573.7	1336.67	4	NFL_HUMAN	13696.3	11367	8959.31	10870.3	19281.6	8029.95	6379.04	7493.84	9015.31	8108.81	9490.65	10978.8	7934.9	9357.37	13623.2	7008.21	11200.7	4298.52	17151.9	3968.64	14468.6	13134.2	22072.9	8939.09	11478.3	20879.3	8500.45	18476.3	7750.46	17365.5	15148.1	10026.5	12359.7	13590.1	4309.19	23215.9	12154.3	18548.5	11273.5	11622.3	17800.1	16623.5	16849.5	10067.8	6813.78
Neurofilament+medium+polypeptide+OS+Homo+sapiens+GN+NEFM+PE+1+SV+3	102529	1480.85	4	NFM_HUMAN	6827.21	7010.4	7535.35	5357.15	4081.7	12471.8	12733.3	12669.8	11143.5	14115.2	3960.44	7506.93	7542.18	5071.53	5951.08	8227.23	7787.33	9274.91	9202.93	7742.11	1822.64	1860.45	1885.25	2809.94	3711.36	2420.67	2481.08	2225.41	2501.28	2366.25	1506.31	1208.43	1367.26	1525.6	1778.28	9010.86	9422.85	8247.44	9471.55	9384.18	6604.05	6230.03	3224.48	6559.6	5546.87
Niban+like+protein+1+OS+Homo+sapiens+GN+FAM129B+PE+1+SV+2	83196.7	3724.52	14	NIBL1_HUMAN	48251.3	48137.3	46936.7	46333	44054	39638	44369.7	44294.7	45355.3	38836.3	22371.3	36896.3	37808	38216.7	36281	40948	43641	41714.3	43308.7	41931.3	45379	40011	46840.3	47316	38992.3	39202.3	40999.3	36011.7	44557.7	33294	47421	45954.7	41215	45908.7	42775	36029.3	37712.7	40395.3	42186	26018	46351	47676	48755.7	40793.3	41356.3
Nicotinamide+N+methyltransferase+OS+Homo+sapiens+GN+NNMT+PE+1+SV+1	30030.3	10470.2	10	NNMT_HUMAN	57150	65072.3	50075.7	65887.7	66515	49256	49005	42580.3	49123.3	46657	39704.3	42643.7	57700.7	42922	42666	65334	55500.7	62193.3	61497.7	54595.3	28115	26647.3	29764	27453	28743.7	19140.7	24910.7	24659	21187.3	21733	56744	62964.7	62738.3	61476	66618.7	26433.3	28083	26629	26464	30346.3	14081.7	15131.7	13129.3	12867.7	16152.3
Non+POU+domain+containing+octamer+binding+protein+OS+Homo+sapiens+GN+NONO+PE+1+SV+4	54345.8	3052.63	5	NONO_HUMAN	19300.7	24031.7	20117	31019	32750	23991	22620	34519.7	29155.7	37057.7	3548	4285	16762.3	18268	26785.7	25607.3	24544.5	25350.3	19706.3	33231.7	34887.3	45986.7	42639	35071.7	37216	30906.3	27907.7	30771.3	30994.7	33292.7	31059.7	33458.3	42443.3	36014	33180.7	43040	49652	45817.7	30325.3	43290.7	36773.7	39543	38282	29605.7	34033.3
Nucleolar+protein+56+OS+Homo+sapiens+GN+NOP56+PE+1+SV+4	66449.2	1675.28	4	NOP56_HUMAN	26850.3	32704.7	39967.7	32198.3	35425	29954.3	28574.7	37322	33033.7	30470	16186.3	16478	28294	33473.7	28716.7	27145.3	24693	32040	37653.3	28740.3	58190.7	49459.3	42768.3	51802.7	43474.7	47987	62860	50430	48685	50098.7	28604	28855.3	26793.3	25032	29199.3	61233	46273	47150	48110.3	46215.7	58640.7	55853	50749.3	67835.3	48822.3
Nucleosome+assembly+protein+1+like+1+OS+Homo+sapiens+GN+NAP1L1+PE+1+SV+1	45659.3	1496.87	3	NP1L1_HUMAN	39593.7	46521.5	18722	42892	21408	43102	47680	51353.3	45945.3	33380	25846	31077.7	39713	16496.5	16409.5	49711.5	18889.5	22380	22457	15663	43597.5	48015	51127	50004	17740	10886.5	23456.5	42475	28505.7	30136	37260.7	34945.7	28256.3	35231.3	3087	39982.3	36534	35208	38498.3	36073	30028	27775.5	20661.7	10950	21206.3
Nucleophosmin+OS+Homo+sapiens+GN+NPM1+PE+1+SV+2	32746.2	18783.5	8	NPM_HUMAN	221628	223682	234190	229769	238658	181886	222466	233634	237294	241230	170359	184136	173736	175391	177834	235935	234606	241892	238597	248551	388871	386505	382619	273712	400323	234749	241453	243340	251342	238504	255231	267521	257735	267300	263065	308165	316511	330110	333188	322756	180899	182399	184410	179569	182323
Nucleolin+OS+Homo+sapiens+GN+NCL+PE+1+SV+3	76671.5	4626.92	20	NUCL_HUMAN	125817	128773	127095	127753	103493	148133	150244	150705	148372	129181	115325	101711	98840.3	147250	98374	121938	121263	120749	118126	144825	140867	148636	155338	149766	153762	120188	124549	124543	126259	121073	109541	123888	119746	108633	114741	166817	160074	160028	160730	157316	123799	119015	116057	117889	115847
Ornithine+aminotransferase+mitochondrial+OS+Homo+sapiens+GN+OAT+PE+1+SV+1	48877.1	1353.61	2	OAT_HUMAN	13123	11436.5	11192	11543.5	16400	19342.5	16182	17359	16266.5	13986	5664	6170	7474.5	19734.5	9661	13907.5	15361	11675.5	12856	13265	19253.5	23676.5	21320	30172	32511	10788	13471	15549.5	16478	19161	15894.5	13730	13987	18236.5	20063	19854.5	21579	23353.5	21522	19501	24295	13957	18050	17029	13443
Obg+like+ATPase+1+OS+Homo+sapiens+GN+OLA1+PE+1+SV+2	44971.7	1181.26	3	OLA1_HUMAN	19519	11727	12690	17539	21902	13736	21526.5	20977.5	20247.5	24644.5	22559	19788.5	19814.5	21775	20145.5	23618	25077	20768.5	17021	22904.5	19872.7	20220	20322.3	21251.7	21765.3	12414	13979.5	23743	15295	14100	21262	20674	17352.3	20998.5	15485.7	24757.5	24519	24230.3	28618	25884.5	19474.5	8525	12709	23286.7	26651
Dolichyl+diphosphooligosaccharide+protein+glycosyltransferase+48+kDa+subunit+OS+Homo+sapiens+GN+DDO	50972	2664.12	10	OST48_HUMAN	42122.3	43130	47360	48384	45888	45508.7	49202.3	53755.7	52483	56187.7	39730	39433.3	40677.7	41729	43727.7	37169	38806	42331	44602.3	48334.3	45065.7	43139.3	45980.3	42814.7	47256.7	46411.3	53491	48788	53514.7	49302	47576	44635.3	46735	46261	44353.3	64813	65736.7	63638.7	63962.7	58685	60536.7	64256.7	62390.3	58436	59721.3
Prolyl+3+hydroxylase+1+OS+Homo+sapiens+GN+LEPRE1+PE+1+SV+2	84249.5	693.138	3	P3H1_HUMAN	22248	25356.3	25683.3	24708.3	18131	23494.7	26023.3	21122.7	20779	15750.7	19376.3	20253	17706.3	18339	24442.7	24606	25996.7	26213.7	22130.3	25321.3	16531.3	15408	13165.5	15208	17451.5	13453	13077	13725	12661.7	15570.5	15443	24622.3	15878.3	19922.7	18974.7	16232.3	20934	13843	13044.3	12958	8388.5	12203	6915	12407	9745.33
Prolyl+4+hydroxylase+subunit+alpha+1+OS+Homo+sapiens+GN+P4HA1+PE+1+SV+2	61334.5	3171.71	10	P4HA1_HUMAN	61595	62368.3	64322	63608.3	58922.3	55736.7	51790	54956.3	52788.3	53430.7	65355	63162	63787.7	64842.7	65031.3	66804.7	68910	67574.3	68166.7	69532.7	55014.3	36961.3	36194.3	36225	38609	25317	31589.7	20563.7	27303.7	28645.3	63442.3	61685.7	61381.7	62909	61540.7	58250.7	52576	57900.3	49543.7	52596.3	28117	24350.3	23963.3	23045.7	21314
Prolyl+4+hydroxylase+subunit+alpha+2+OS+Homo+sapiens+GN+P4HA2+PE+1+SV+1	61301.2	2101.92	11	P4HA2_HUMAN	55967.3	52753.3	48900.3	42699.3	49188.7	44743.3	44806	45729.3	38812.3	43914.7	50719.7	50182	50625.7	54515.7	52942	48772.7	51208	52344.3	46491	44101.7	30379.7	25683.3	26152	26775	25045.7	18022	17009	16490.3	16059	16535.3	46442	49356	53371	52838	54528.7	28828	27767	28130.7	26766.3	26111	23143	22882	20685.3	20357.7	17119
Delta+1+pyrroline+5+carboxylate+synthase+OS+Homo+sapiens+GN+ALDH18A1+PE+1+SV+2	88043.8	469.788	2	P5CS_HUMAN	16753.5	17018	16147.5	17359.5	11839.5	17369.5	18952.5	17897	9115	12420.5	13677.5	11069.5	17456	15493.5	14338.5	15075.5	17628.5	16642.5	18122	20515.5	16784.5	13020.5	26450	13722	18257.5	14662.5	14094	11552	14281.5	11323	16916	14506	14128.5	14937.5	13179.5	17542	15498.5	13968	16181.5	16750.5	13740.5	23446	14336.5	16796	14100
Proliferation+associated+protein+2G4+OS+Homo+sapiens+GN+PA2G4+PE+1+SV+3	44129.1	743.146	2	PA2G4_HUMAN	32019	23554.7	25695	17330.3	27473.5	28911	30592	24267	24022.7	19002.3	24031.5	22718.5	21681.7	24129	25009	30345.5	25887.7	24263.3	23602.5	19479.7	34140	32771.7	29985	39415	39845	16127.3	43903	18997	38180	40926	18081	24717	27217	43448	24020	24574	19307	17547	18092.3	18215.7	15965.3	21093.5	18813	25243	23790
Polyadenylate+binding+protein+1+OS+Homo+sapiens+GN+PABPC1+PE+1+SV+2	70899.1	3610.57	19	PABP1_HUMAN	39482.3	34411	39082.3	37936.8	38500.7	33227.2	40254	37253.3	41174.8	40088	25368.5	27501.4	26228.6	24793	23292.8	44910.1	41201.7	39635	30129.1	41596.5	67163.2	64116.9	69450.7	61814.1	70946.2	58348.3	54989.6	60757.2	59879.6	58072.2	34207.7	32932	37057	37836	38609.7	63756.6	64147.3	62871.3	63589.7	61646	66220.7	65602.2	66184.7	66230.1	67283.5
Polyadenylate+binding+protein+4+OS+Homo+sapiens+GN+PABPC4+PE+1+SV+1	71125.2	2431.79	12	PABP4_HUMAN	43046.7	50316.7	48293.7	36907.5	50881	51559	32143.3	36209.7	52037.7	35475.7	37047.3	54923.6	49126.1	39425.9	51523.2	60693.9	66906.3	42041.8	52922	50484.5	34935.2	34337.7	31610.3	42933.3	39160.7	33525.9	31108.5	33512.2	34744.7	33593.4	52686.3	49621.7	49764.3	37854.8	64282.7	31796	35767.6	30803.1	33889.3	43156.7	27627.2	25773.5	32227.7	33964.4	33228.5
Bifunctional+3+phosphoadenosine+5+phosphosulfate+synthase+2+OS+Homo+sapiens+GN+PAPSS2+PE+1+SV+2	70071.1	1169.1	4	PAPS2_HUMAN	12327.3	13586.3	13392.7	12934.3	13865	19964	19549	21920	22159.3	21432.3	14574.3	15139.7	15284.3	15469.3	14228.7	9330.33	12230	12987	12205.7	10921.7	4300	5772		7462	2911.33	3261.5		2951	6285	7237	13401.7	12596	16763	14909.7	14713	10085.3	12845	4113	6619	7352	5202	5518	6377.5	2824
Protein+DJ+1+OS+Homo+sapiens+GN+PARK7+PE+1+SV+2	20062.2	9239.02	8	PARK7_HUMAN	72247.3	69413	60058.7	50587	71817	54815.7	58118.3	46629.7	44690	46535	53322.3	54413.7	56896.3	56093.3	57498.3	70357	66746	67867.7	47701.7	43789.7	71019.3	67350.7	70409.3	71324.3	62224	84343	97537.7	82734	83919.3	75763.3	53326.3	69585.3	65516.3	67120.3	68431.3	48520.3	58915.7	61331	48749.3	60347.3	45378	47484	52429.3	55267.3	52306.3
Poly+rC+binding+protein+1+OS+Homo+sapiens+GN+PCBP1+PE+1+SV+2	38011.1	7191.53	10	PCBP1_HUMAN	57996	65564	58809	50423.3	62899.7	53379.7	70508.3	57817.7	41344.1	66152	41228.3	46664.3	46146.3	46895.3	49274.3	55512.3	65665.3	61004	58855	60311	67759.3	66591.7	64097.7	62564	67769.7	73988.7	69107	70319.7	74888	67683	53654.7	58394.3	57694.7	62756	56384.3	76334.3	67501.7	66627.7	59698.1	76405.3	62842.7	63127	69303.3	59877	64602
Poly+rC+binding+protein+2+OS+Homo+sapiens+GN+PCBP2+PE+1+SV+1	38979.4	7383.72	11	PCBP2_HUMAN	61625.1	68758.3	68879.6	69814.4	69317.1	64414.6	72004.4	67787.5	49856.6	75144.8	39855.4	45597	47449.1	52211.6	55404.9	72620.8	70279.8	68234.2	67287.6	71183.2	78459.4	81928.2	78867	78027.3	78580.7	102495	95063.1	100989	103273	99474.8	69498.2	68470.3	71418.4	61596	60517	102156	100395	94243.8	105400	108371	81267.4	86285.4	94535.8	100449	79283
Poly+rC+binding+protein+3+OS+Homo+sapiens+GN+PCBP3+PE+1+SV+2	39750.5	5304.98	7	PCBP3_HUMAN	17954.5	15907.5	17899.4	16765.6	22933.9	17178.4	16210.9	17165.5	15271.6	17687.8	32848.6	18732.2	21482.6	31513.4	20500.5	16364.2	15109.5	16687.4	16211.8	15552.8	28019.6	28353.8	25939.3	20475.9	22020.8	27198.6	32039.6	27905.7	30604	28511.2	21928.1	21240.4	13693.2	22029.7	20410.2	22438	20668.6	22155.7	22961.4	19795.9	25506.8	26215.6	25280.9	27863	27645.2
Proliferating+cell+nuclear+antigen+OS+Homo+sapiens+GN+PCNA+PE+1+SV+1	29111	3575.48	4	PCNA_HUMAN	20210	19914.5	24729	23879	26340.7	25051.5	42845	40710.7	40114	40200	14372.5	14166.5		16240	22903.7	22425	18578	29194.3	25196.7	27823.7	30088.7	41570	37833.3	40419.7	44857.7	53089.3	47652.3	49267	52599	46240	27906	26516	26185	30368	28956.7	47750.3	48297.3	46366.3	47582	47856.7	30434.3	37502.3	36874	33455.7	37818.3
Programmed+cell+death+6+interacting+protein+OS+Homo+sapiens+GN+PDCD6IP+PE+1+SV+1	96650.6	962.092	9	PDC6I_HUMAN	20405.3	26215	25153	25787	25871.3	26067.7	25749.7	25069.7	24678.3	22065.7	19717	24381.3	24875.3	25224	27870	28130.3	27742.7	27212.3	26571.7	27662.3	23685.3	21711	21682	22824	23145	23019	23281.7	24048.3	23881	23616	27211.3	27681	26086	27573.3	26204.7	27465.3	22855	21580	22233.7	24038.7	26848.7	25312.3	25493	25057.7	24568
Protein+disulfide+isomerase+OS+Homo+sapiens+GN+P4HB+PE+1+SV+3	57515.6	25925.3	28	PDIA1_HUMAN	161716	161170	160959	157824	148101	151697	156608	142195	153477	147735	161833	163302	170051	168390	164071	159407	162985	159589	160344	156971	164566	161509	161104	168314	160320	131065	130627	126717	137216	138388	159746	160407	157131	154769	148512	153526	168000	171606	171204	167687	114955	120228	119650	119592	120890
Protein+disulfide+isomerase+A3+OS+Homo+sapiens+GN+PDIA3+PE+1+SV+4	57181.6	9951.75	28	PDIA3_HUMAN	162790	173970	168847	167897	158235	157570	172930	163151	161704	156170	162318	170293	167969	169143	164839	164112	163843	167320	162592	157414	202536	191783	190138	194777	180288	243808	255838	258577	215992	240722	162196	169155	167079	167973	158446	245630	237756	239669	240101	245430	220160	228913	231481	225797	223590
Protein+disulfide+isomerase+A4+OS+Homo+sapiens+GN+PDIA4+PE+1+SV+2	73274.7	2250.78	19	PDIA4_HUMAN	57461	56324.3	58092.3	64691.3	59268.3	57639	58311.7	61474.7	62693.7	62052.7	58308	60955	60990	62250.7	59960.3	66771	58489	66944.7	66777	62263	73508.3	69634	71965	71119.3	76732.7	85312.3	86537	86830.3	85298.3	80255	66202	66528	67532.3	66084	62539	69652.7	69583.7	72900	73074.7	69691.3	72303.3	70637	70777.3	65434.3	72404
Protein+disulfide+isomerase+A6+OS+Homo+sapiens+GN+PDIA6+PE+1+SV+1	48520.6	8752.78	16	PDIA6_HUMAN	116781	115102	118962	114387	114174	114013	110870	118535	115108	118787	121223	121329	119168	114289	119067	115901	120032	115408	114381	111961	134657	141018	136129	130573	122376	125411	112694	128249	116132	110752	117763	119101	118417	126099	123793	134898	133687	135482	137717	138624	97489.7	99493	96041	97382.7	104000
PDZ+and+LIM+domain+protein+4+OS+Homo+sapiens+GN+PDLIM4+PE+1+SV+2	35911.3	1996.3	2	PDLI4_HUMAN	15098	27314	24053.3	21196.3	17227.7	16804.3	22452.7	18291.3	13637.3	7361	14169	28208.5	26260.5	20020.5	19172.7	18224.5	22074	20402.5	28326	24818	11168.7	15312.5	17280	17787.3	16972.3	12903	3980	13565.5	14413	16264	21158.7	21360.3	20973.3	20769.7	23292.5	15067.3	21370.5	19139.7	16307	14511	15954.5	15524.5	13750	12220	9338
PDZ+and+LIM+domain+protein+7+OS+Homo+sapiens+GN+PDLIM7+PE+1+SV+1	50928.3	1656.99	6	PDLI7_HUMAN	44886.7	47185.7	46875.3	46927.7	51190.7	45844	40856.3	47912.7	47699.3	51047.3	60502	55471.7	56599	57957	55713	44873	45398.7	55088	47712	48606	28557.7	32931	32144	26922.7	27024.7	10557	15149.7	7407.33	15374.7	18223.3	48344.3	53312.3	52821.3	55568	51386	25203.3	35680.3	30883.3	31713.7	30148.7	15640.3	10903.7	21815.7	20976.7	21951
Phosphatidylethanolamine+binding+protein+1+OS+Homo+sapiens+GN+PEBP1+PE+1+SV+3	21170.9	3309.85	5	PEBP1_HUMAN	36605	54250.3	55092.3	48816.3	65656.3	55296.7	56252.7	56986.3	54755.7	55703	35902.7	28251	30557.3	31118.3	42844.3	35785	53667.3	54285	53787.3	52563.7	65994.7	67050.3	65964	63306.7	67705.7	70584.3	70226.7	70618.3	68649.7	66932	50279.3	44012.7	40780.3	63579.3	63257.3	61532.3	65158.7	58641.7	50692.3	60221.3	37176.5	56241.7	54997.3	59716.3	58155.7
Peripherin+OS+Homo+sapiens+GN+PRPH+PE+1+SV+2	53765	5640.17	8	PERI_HUMAN	16594.7	12222.3	15424	22525.7	20455.7	12870.3	16453.3	19010.7	23525.7	22894	5492.34	13154.7	10042.3	12545.2	18693	14565.7	12408	13716	12193.1	19807.7	24092.7	23774	26670.3	26944	23232	24014.7	18350	31078	19171.3	14965.7	22391.3	20968.7	22006.7	21841.3	20002.7	20472	19554.3	19502.3	21228.7	11313.7	16909.7	21871.7	23501.7	22512.7	21986
Phosphoglycerate+mutase+1+OS+Homo+sapiens+GN+PGAM1+PE+1+SV+2	28918	20080.5	16	PGAM1_HUMAN	179409	171000	172752	157036	160919	144807	144445	148107	144903	149925	117313	144174	144036	148408	123572	157725	163430	165746	164261	138631	132282	146150	138809	143545	128492	154187	160693	161200	163502	156118	167876	168575	169767	154812	160022	183709	185049	180972	183340	177632	139851	145616	145102	140061	147715
Probable+phosphoglycerate+mutase+4+OS+Homo+sapiens+GN+PGAM4+PE+1+SV+1	28948	9629.36	5	PGAM4_HUMAN	3994.18	3814.4	4028.95	2661.18	2668.19	6654.96	7041.66	7328.08	7280.84	10474.1	2319.35	3663.23	3792.1	3875.21	3081.21	7671.52	8170.96	8499.35	8520.89	7549.63	7998.4	6205.24	5781.14	6068.54	5701.08	53381	54297.5	54285.5	37605.3	51042.2	6639.8	5515.67	7379.83	4871.57	5038.04	5676.44	7003.32	5527.97	6955.95	5409.85	49547.3	50972.5	48475.8	42410.5	46111.5
Phosphoglycerate+kinase+1+OS+Homo+sapiens+GN+PGK1+PE+1+SV+3	45014	13813.8	24	PGK1_HUMAN	135412	135651	134137	137262	119291	104819	111115	110878	104770	111406	105499	109751	89936.7	106703	112231	122947	127440	129804	127398	127083	77395	82426	82613	82418.3	76076.7	119212	120744	116631	117317	111732	136064	141906	138348	142432	115321	131420	132462	131764	127998	121770	131899	130258	139866	129128	132220
Phosphoglycerate+kinase+2+OS+Homo+sapiens+GN+PGK2+PE+1+SV+3	45195.4	1983.27	5	PGK2_HUMAN	4264.34	5960.74	4153.77	4488.19	5372.88	6762.98	9118.22	6264.09	5010.19	8245.29	3987.82	4002.01	3434.88	4081.51	4556.51	4254.24	6987.18	5180.14	5204.5	8726.94	9088.36	7771.55	8032.1	7914.66	9845.83	5045.48	11375	9543.15	9400.58	7614	4722.39	5825.94	5228.81	9588.94	6758.67	4239.99	3740.04	1892.59	4286.73	1984.69	4022.26	5501.37	4761.88	3350.72	10431
Phosphoglucomutase+1+OS+Homo+sapiens+GN+PGM1+PE+1+SV+3	61734.4	631.615	4	PGM1_HUMAN	11737.7	14341.3	15707.3	15887.7	16322	11083	11083	7241	11177.7	10262	5709.5	9255.33	7682.33	8595.67	9689	10977.3	10919.7	11713.5	16745	8541.33	13635	14087	13495.7	14920.3	10947	18949.7	16218	23075	23390	17754	15767.7	14951	15587.7	15333.7	14745	13071.5	17820.7	10670.7	19012	16542.7	13707	9963.33	16197	14636	14775.7
Membrane+associated+progesterone+receptor+component+1+OS+Homo+sapiens+GN+PGRMC1+PE+1+SV+3	21785.2	1985.38	2	PGRC1_HUMAN	31902	27563	49539	28273	35521.5	30842	25773.5	26891.5	26929	29390	62965	63002	35333	37692.5	34135.5	39976	40209	34544.5	34249	36436	55122	31856.5	38973.5	71092	77280	23421	26597.5	27612	26444.5	47496	36773	35160	34016	34009	36059	28902	27269	27954	27543.5	31043	17355	17984	19066	18917.5	31548
Prohibitin+2+OS+Homo+sapiens+GN+PHB2+PE+1+SV+2	33296.4	2638.77	4	PHB2_HUMAN	28891.3	28479	26357.5	26302	21334	23743.5	18460.5	20478.5	13327	22873.7	30337	30267.5	27411	20679	21476.3	24728.5	21047	22088.7	21101.7	32385.3	54556.3	49283.3	58615.3	41545.3	42944.7	60772	49661	57093	47343	60949.3	28133	21178	28530	12829	14748.5	46305.7	34424.3	42721.3	44695.3	45972.3	47153.3	62083.7	64529.3	64826.7	66616
Prohibitin+OS+Homo+sapiens+GN+PHB+PE+1+SV+1	29861.1	3853.77	8	PHB_HUMAN	32375.3	36366	36726.7	28787	36395.3	40017	38813	39188.3	28286.3	40086.3	39783.3	38868	35086	32901.3	32208.3	36600	38581.3	40006	36996.7	38982.7	49942	52610.3	55775.3	54482	50293	66989.7	66472	70817.3	69578.7	68030.3	42070.3	25948	39578	40106	39857	63112.7	60410.7	60878	60978.3	60997	40921.3	57028.3	59508.7	57785.7	57804
Plectin+OS+Homo+sapiens+GN+PLEC+PE+1+SV+3	533787	1630.79	120	PLEC_HUMAN	181679	126233	167357	159006	136491	81423.3	114809	86113.3	126812	121000	89683.7	80616.3	74910.7	88466.3	90073	88673.3	181441	132019	168632	102276	116415	115711	119193	128301	127760	88502.7	103455	105592	123245	105208	122213	122519	119726	126652	127433	81572.3	109787	96461.7	80578.3	114050	91485.3	68199	93291	103346	96097.3
Perilipin+3+OS+Homo+sapiens+GN+PLIN3+PE+1+SV+3	47246.1	6538.91	18	PLIN3_HUMAN	66634.7	70864.3	69727.3	76026	91622.3	71683.7	77867.7	73359.3	73160	73216	57888.3	57224	61074.3	59559.3	64621.3	64553.7	70239	71149	66600.3	62233	112057	121050	121831	121535	120292	90448.7	60691.7	87007.3	97263	94322	66514.3	83979	85113.7	84685.3	70274	71096	73780.3	83339.7	74445.3	83353.7	54497	55977	54342	55102	51100.3
Procollagen+lysine+2+oxoglutarate+5+dioxygenase+1+OS+Homo+sapiens+GN+PLOD1+PE+1+SV+2	84120.6	1032.46	5	PLOD1_HUMAN	22834.3	23984	22097.3	22841.7	30033.3	23963.7	21837.7	23863.3	21690.3	24862.3	21221.7	22051	17383	23691	25334.3	18362	25749	25807.7	21810.3	22125	30789	35554.7	30362	27234.7	42754.3	26754.3	30821	31596.3	26982	25817	26494.3	26256.3	26370	29065.7	23596	32720	34066	30865.7	31644	24350.7	26397.7	12770.7	23542.3	26691.3	11142.5
Plastin+3+OS+Homo+sapiens+GN+PLS3+PE+1+SV+4	71324.4	1403.66	4	PLST_HUMAN	21682.3	15805	21113	22972	24939.3	15481.5	20994	24045.7	19402	24152	20125	20364.3	20092.7	19009.3	17625.7	18796	17752	16328.5	22181.3	20268.3	10301.7	11913	11923.7	16528.7	16352.3	12414	11313	13888	12233.5	12967	23149.3	17700	23458	23769	24866.3	14886	16123	14787	15716.7	17790	11931.5	11354	6428	9850	10681
POTE+ankyrin+domain+family+member+I+OS+Homo+sapiens+GN+POTEI+PE+3+SV+1	122936	8239.17	12	POTEI_HUMAN	26180.4	16519	28180.7	27884.1	24965	18495.2	19980.7	18813.3	16351.5	16367.5	18135.6	18226.1	19025.7	13894.4	30790.4	18979.1	20461.2	20171.3	20234.7	18879.1	18229.4	16905.3	16044.7	17006.9	14689.1	25811.6	25184.2	26444.3	22802.6	25541.2	40312	41013.3	39456.1	41919.2	35377.4	32012.8	34104	27414.9	29319.7	25790.6	17466.9	21381.3	20799.6	20805.5	18296.1
POTE+ankyrin+domain+family+member+J+OS+Homo+sapiens+GN+POTEJ+PE+3+SV+1	118816	9516.38	11	POTEJ_HUMAN	9640.6	6338.62	10180.5	10267.9	9193.03	15498.1	16742.9	15764.7	13701.8	13715.2	4407.47	4429.47	4623.78	3497.17	7482.96	14542.2	15677.8	15455.7	15504.3	14231.4	6917.13	6174.35	5860.01	6211.44	4814.68	10678.4	9858.96	10903.2	8662.73	10691.1	14155.4	14401.7	13854.8	14719.8	12709	4829.53	5237.22	4267.82	5117.99	4884.72	3927.1	4045.75	4661.08	4115.79	3396.61
Serine+threonine+protein+phosphatase+PP1+beta+catalytic+subunit+OS+Homo+sapiens+GN+PPP1CB+PE+1+SV+3	37985.3	5845.31	8	PP1B_HUMAN	21679.6	22740.4	23221.4	23873.2	25638.3	29131.6	26837.9	27810.4	26323	32141.1	14145.9	20752.3	20824.1	18461.6	20721.9	21693.4	23535.7	22916.3	21884.1	21430.7	29036	26913	17785.3	27238.8	26696.2	16429.3	19690.3	20408.3	19709	22142.3	25271.5	28447	28231.6	28557.4	24667.6	27878.5	17501	25678.5	27966.5	26731	14618.7	20578	20859.2	8756.67	19838.7
Serine+threonine+protein+phosphatase+PP1+gamma+catalytic+subunit+OS+Homo+sapiens+GN+PPP1CC+PE+1+SV+1	37725.2	5154.49	9	PP1G_HUMAN	27093.8	28468.3	27652	28959.1	29879.2	30862.6	28755	31399.9	26132.3	33590.6	22992.5	27797	27491.3	21774.3	28064.2	29688.9	31005.2	31674.2	30282	29334.6	58072	53826.3	36488	55208	53392.3	32858.7	39380.7	40816.7	39418	44284.7	33894.5	36840.6	35434	38139.8	35753.1	55757	38786.7	55178.7	57436	53462	29237.3	45182.3	45401.7	19891.7	39677.3
Protein+phosphatase+1+regulatory+subunit+7+OS+Homo+sapiens+GN+PPP1R7+PE+1+SV+1	41678.3	894.186	3	PP1R7_HUMAN	11121.7	16339	11449.3	16472	14972.7	11537	14044.7	11737.7	10788.3	14648.3	14088	12259.7	15754.7	15021.7	12346.7	14401.3	16327.7	11784	14629.3	16534.7	13779	16045.7	20289.7	22390.3	14204.7	20829	19401.7	22574.3	22660.3	24282	19257.3	15104	21319.7	17920.7	15355	15036.3	14161.7	10382	15610.3	16977.7	12346.7	12171.3	12111.7	16949	19408.3
Peptidyl+prolyl+cis+trans+isomerase+A+OS+Homo+sapiens+GN+PPIA+PE+1+SV+2	18240.6	31757.7	10	PPIA_HUMAN	253680	271473	271970	267987	258194	225204	226078	225822	222885	202805	194394	208247	205467	205824	194583	267820	276732	269715	268493	259874	294435	294270	288106	280833	267272	345962	339892	347190	323714	321245	163707	293850	280932	290908	273235	303119	309493	302941	279681	290293	240974	149803	143033	142046	234617
Peptidyl+prolyl+cis+trans+isomerase+B+OS+Homo+sapiens+GN+PPIB+PE+1+SV+2	23799.6	13192.6	13	PPIB_HUMAN	192973	197208	191694	191656	181126	171292	176563	171617	173892	130907	173843	183258	178337	178972	203921	204081	193150	132162	188479	191051	246306	229320	222769	229206	231006	228092	235037	236595	220498	230210	190933	186020	208267	170586	182784	208721	208109	206912	205876	196265	227957	210851	217716	225407	228864
Peroxiredoxin+1+OS+Homo+sapiens+GN+PRDX1+PE+1+SV+1	22338.5	11888.4	13	PRDX1_HUMAN	162918	158384	164087	152626	151440	145192	140052	137957	146622	141672	110172	127543	115956	121461	125756	148779	149427	131976	161831	140795	241084	237590	234339	235949	229571	281344	254975	247735	246494	259165	157612	194717	168030	167147	179188	213123	152318	267086	266487	160543	205590	220329	218093	223153	221427
Peroxiredoxin+2+OS+Homo+sapiens+GN+PRDX2+PE+1+SV+5	22063	6350.58	7	PRDX2_HUMAN	33988.3	35950.3	37427	35858	43728.3	33099.3	35667.3	35620.3	40930	39806	27287.3	29315.3	29700.7	34797.3	33817	31473.3	39268.7	38960.3	36128.3	29257.8	55382.3	52187.5	65821.7	44878.8	51845.2	81035.3	84239.7	86947.3	87840.3	86302	38984.4	30542.7	39248.3	38682.7	34245	51266.3	49977	52908.3	48573.7	50700.7	51756.9	59775.7	52550.4	55612.3	55849.7
Thioredoxin+dependent+peroxide+reductase+mitochondrial+OS+Homo+sapiens+GN+PRDX3+PE+1+SV+3	28034.8	2303.69	3	PRDX3_HUMAN	32544	49437	35753	36892.3	37007.3	35629.3	34451.7	38118.7	37305.7	36502.7	38603.7	38764.3	41001	39202.7	46455.7	31688	35433	39266	38202.7	37961.3	48236	45641	46291.7	44750.3	49110.7	51208	40328.3	54618	37908.3	52956	39307.3	40841	37792.7	41389.7	40287.7	40626	40269	42540	40780.7	39840.3	44195.7	33916.7	36684.7	36527.3	32664
Peroxiredoxin+4+OS+Homo+sapiens+GN+PRDX4+PE+1+SV+1	30768	2606.56	9	PRDX4_HUMAN	42595.3	33343.7	36645.7	40394	28976	33519.7	41475.7	32042	33125.3	36419.3	33375	39092.7	34621.7	35505.3	39135.7	39896.7	39729.3	38576.3	39931	37515.7	52665.3	50795.3	51617.3	30264.3	35434.3	37287	38052	33530.3	34624.3	32429.7	32943	29077.7	34809.7	29529	27345	37316	29238	35475.7	34735	30806.7	46411.3	30766	26914.3	42741	39922
Peroxiredoxin+5+mitochondrial+OS+Homo+sapiens+GN+PRDX5+PE+1+SV+4	22314.6	10247	9	PRDX5_HUMAN	68859.7	44315.3	46089.7	44331	81775.3	33763	32826.7	35936.7	33907	34772.3	53167	52981	56546.3	58100.7	44299.3	73523	41647.3	44906.3	44217.7	77933	96509	72772	95857.3	102197	80651	103830	100808	77209.3	69245.7	99004.7	77629.7	81613.7	50086.7	48968.7	77292.3	37914.3	74944	71743	69412.3	75976.3	52045.3	50658.3	49709	52208	68372
Peroxiredoxin+6+OS+Homo+sapiens+GN+PRDX6+PE+1+SV+3	25149.1	24373.4	20	PRDX6_HUMAN	218492	220773	219225	217507	197611	211379	174910	202104	200632	197305	188928	196641	203087	177018	197318	186095	182899	210160	204031	205611	125263	123290	117325	121167	107602	119500	105371	106143	114842	93269	202085	195475	202775	211357	194335	141574	138902	128829	131054	131045	114050	115137	116476	114615	118915
Profilin+1+OS+Homo+sapiens+GN+PFN1+PE+1+SV+2	15225.3	32301.3	10	PROF1_HUMAN	373146	371654	384866	378948	385085	286293	303625	304678	272203	309149	362406	376265	376805	368710	378742	427532	429346	432955	434231	454282	435590	388978	427858	440746	352722	324149	315904	344841	334501	326155	347549	407887	410510	419633	399585	308494	309680	321436	299975	303508	233671	233758	217472	240402	222981
26S+protease+regulatory+subunit+6A+OS+Homo+sapiens+GN+PSMC3+PE+1+SV+3	49488.8	1236.77	3	PRS6A_HUMAN	19676.5	21582.7	19851.5	17532.5	17258.3	21222	22413	17343	19159.5	21594	14707.3	18158	19808	21790.3	20640.7	20447	19696	23129.5	21989	21196.5	28013	30797.7	30772.3	30013.7	29877	25511.3	26267	25403.7	25709.3	18959.3	21306.3	17436.3	23188	22483	23975.7	30383	20111.3	20131	19542.3	19413.7	28642.3	25612.3	25651	23617	23129.7
26S+protease+regulatory+subunit+6B+OS+Homo+sapiens+GN+PSMC4+PE+1+SV+2	47480.4	4897.83	10	PRS6B_HUMAN	26615.7	26350	27789.7	30907	24500.3	30191.7	30548.3	27866	25520.3	26135	22924.7	27336.3	29034.3	25723.3	22730.7	26527.3	24182.3	23382	26303.3	22117	34280	34203.3	32308	33271	31631.3	36092.3	38807	40592.3	37056.7	34908.3	25560	27112.7	27288.7	27483.3	25450.3	39690.3	38566.3	41529.3	43467	39707.7	35516	32775.7	34007	32478.7	33390.7
Proteasome+subunit+alpha+type+4+OS+Homo+sapiens+GN+PSMA4+PE+1+SV+1	29769	2577.88	2	PSA4_HUMAN	38235	39375	28354.5	27587	54773	35250	26909	28428	30027.5	28601.5	34135	24890.3	35740	36072	37589	37750.5	37676.5	25068.5	26959	28034.5	27669					21510.5	45553	47345		28938.5	4927	55290	28407.5	6613	56326	5756	21921	17613.5	1305	39557	16820.5	17115.7	6216	18547	6942.67
Proteasome+subunit+alpha+type+5+OS+Homo+sapiens+GN+PSMA5+PE+1+SV+3	26582.2	1745.19	6	PSA5_HUMAN	24875.3	37479.3	38446.7	30508.7	83998.3	25142.7	46735.7	39846	38796	41153	5292	19943.3	16138.3	11058	58215.3	34826	32982.7	48640.3	31236	29553	73239	63079.7	64283	77057.7	77284	67132	67938.7	72039	65645.7	66344.3	64694.3	70820.3	67900.7	69434.7	86516.7	73913.3	58301	58773.3	72935.3	61298.7	40471.7	41933.7	23601.5	48559	65747
26S+proteasome+non+ATPase+regulatory+subunit+13+OS+Homo+sapiens+GN+PSMD13+PE+1+SV+2	43230.7	1343.64	4	PSD13_HUMAN	11575	11822	9240.33	8509.33	10039.7	13455	11634	14182.5	10258.3	11603.7	17131	9996.33	11356	13772.7	6814.5	11846.7	12795	12173.5	8414.33	12781.5	15140.3	16624.5	10719.3	14318.5	13592.5	12358.5	11212.7	12761	7680.33	5457	13231	15191.5	17188.5	14444	15753.5	17431.7	15629.5	16790.7	16282	16546.3	14826	20890.7	7922.5	12669	16070.3
26S+proteasome+non+ATPase+regulatory+subunit+14+OS+Homo+sapiens+GN+PSMD14+PE+1+SV+1	34748.2	3557.68	5	PSDE_HUMAN	18198.3	21253.7	20898	23734.3	21859.7	21396.3	21449.7	20819.7	21629	23179.7	13420	16263.3	16689.7	16576	17895.3	16425	18505.3	20071	17231	18646	37460	37194.3	40215.7	39327.7	43858	39251	36163	33925.3	35111	28170.3	23431.7	24029	21976.3	25208.3	26209.3	28712	35043.7	24866.7	35607	29817.7	30663	23783	32851	31441	21538
26S+proteasome+non+ATPase+regulatory+subunit+2+OS+Homo+sapiens+GN+PSMD2+PE+1+SV+3	100941	1915.47	22	PSMD2_HUMAN	35631	32592.3	27220	32403.3	33090.7	24237.7	28797	29786.7	25881.3	34164	27047.3	34822.3	38305.7	21006.7	24258.3	26681.7	26749	36027	25893.7	30286	35807.7	34459.7	32673.3	31932.7	31300.3	38169	38637	38817	38935.3	42355.3	29768.7	33571.3	30702.3	30010	26008.7	37759	35307	34111.3	40355.7	46762	27953.7	30966.3	31422.7	32183.3	37211
Polypyrimidine+tract+binding+protein+1+OS+Homo+sapiens+GN+PTBP1+PE+1+SV+1	57392.5	15114.3	16	PTBP1_HUMAN	92156.3	97359	95116.7	91327.3	97294.7	91197.3	88864.7	87959.3	86304.3	94115.7	80349	80591.3	73675	71461.3	80830.7	89932	94476.7	96053.7	88068.7	91888	89526	116608	115290	118378	91781.3	73143	72212.7	73811.3	79015	74783.7	90293.3	92009.3	93325.7	97588	91628.3	108563	111016	118211	109762	107659	123552	124061	119878	119661	121045
Polymerase+I+and+transcript+release+factor+OS+Homo+sapiens+GN+PTRF+PE+1+SV+1	43476.2	7617.24	9	PTRF_HUMAN	149409	142568	147976	147426	139842	135296	140179	140221	134244	128933	101412	147304	144785	155416	141191	161280	154003	153132	153736	142526	102484	89775	95096.7	100584	94103.3	46038.7	50233	49012	49801.7	45522.3	144808	140381	137466	136085	143889	95008.7	91548.7	81009.3	84371.3	79045.7	51435.7	48869.7	53374.7	44794	34201.3
Poly+U+binding+splicing+factor+PUF60+OS+Homo+sapiens+GN+PUF60+PE+1+SV+1	60046.7	1580.43	3	PUF60_HUMAN	15879.3	24048	18150	19065.3	18247.3	16080	18292	19780.3	18520	19181.3	10618.5	11301.7	13390	12918.7	10333.3	16129.7	15614	18060	17461	16388.3	16477.3	16605.7	17603.7	17167.3	18440	15072.3	16546	17212.7	15806.3	14835	15994.3	18051	17328.3	17614.3	18234.7	24957	24408.3	22817.3	21434.7	22830.7	18764.3	20467.7	20679.7	17827.3	20360.7
Bifunctional+purine+biosynthesis+protein+PURH+OS+Homo+sapiens+GN+ATIC+PE+1+SV+3	65129.2	1625.2	12	PUR9_HUMAN	26755.3	30337	25984	24884	27858.7	22534.3	27695.3	26254	27307.7	25955.3	17460.3	20839	18067	20336.3	17931.7	53090.7	25398.7	24542.7	26380.7	21239	30308.7	31249.7	29234	31270	33576	27634.3	27961.7	30853.7	30022.3	27700.7	25041.7	26027.7	29595.7	25429	34450.3	27193.7	29031.3	29134	30527.3	28848.3	29501.7	25152.7	30337.3	28361.7	25247.3
Ras+related+protein+Rab+10+OS+Homo+sapiens+GN+RAB10+PE+1+SV+1	22769.1	2816.91	4	RAB10_HUMAN	14649.7	15284.5	14614.4	14141	13873.6	11782.2	7962.96	14323.5	13536.4	9402.22	15103.1	15940.3	15559.5	15231.1	16714.6	15085.9	16224.4	15200	15236.9	16005.1	27562.8	24591.7	24857.1	25950.9	19400	29745.4	33425.6	32434.4	30795.5	33082.9	15878	14892.8	14919.3	15267.6	11714.2	16116	15500	19645.7	21351.6	19483.2	41192.2	40075.3	39130.3	39473.2	38343.2
Ras+related+protein+Rab+1A+OS+Homo+sapiens+GN+RAB1A+PE+1+SV+3	22905.9	5238.57	9	RAB1A_HUMAN	27459.1	27712.9	27583.5	27649.3	28834	36884.5	35971.2	34331	33156.2	36372.6	28343	31354.6	32179.4	34285.2	31732.1	30358.1	34527.7	35809.7	34299.7	31599.6	38405.6	32348.4	33751.1	34048.7	29055.8	20827.7	21752.7	22180.1	23435.3	24508.3	29651	35206	33821.5	34474.6	37093.3	35231.1	38065.9	37426.2	38414.8	37379.7	29616	34567	30320.4	32082.9	27988.4
Ras+related+protein+Rab+1B+OS+Homo+sapiens+GN+RAB1B+PE+1+SV+1	22342.3	4601.11	7	RAB1B_HUMAN	31647.6	29753.9	29374.9	30555.5	35489	28557.5	30004.8	28261.1	24721.3	28692.7	22260	24771.3	22625.7	23764	25557.6	31013.5	34853.9	38118	35291.8	31959.1	43593.9	41091.7	42261.3	45344.2	40320.2	30895.8	29149.1	30899.7	33096.4	32388.7	29524.6	34466.6	29536.9	31026.7	28468.1	29459.6	30486.9	31353.2	32870.9	32300.9	26290	30895	29032.3	28219.8	26273.3
Ras+related+protein+Rab+30+OS+Homo+sapiens+GN+RAB30+PE+1+SV+2	23400.4	1159.29	2	RAB30_HUMAN	7895.39	7546	6642.78	7835.73	7427.3	8439.94	3955.48	7786.2	8383.07	8770.35	4131.11	5165.66	4305.92	5007.58	6336.98	7889.56	6522.58	5591.18	7868.36	7079.39	7033.29	7001.81	7466.6	5682.75	4260.6	4438.47	3901.48	5108.61	4487.01	7390.22	5260.96	4115.33	4081.08	7036.56	7336.22	4276.49	4998.03	6437.16	4582.56	5661.43	5294.88	3818.69	3167.61	3938.5	5348.31
Ras+related+protein+Rab+35+OS+Homo+sapiens+GN+RAB35+PE+1+SV+1	23310.4	2059.56	2	RAB35_HUMAN	10445.4	10850.3	10615.4	9802.86	9249.43	1643.51	2244.77	1572.47	1603.54	1431.15	4301.39	4668.47	4435.43	4678.36	4819.73	1756.26	1883.68	2300.21	1847.05	1655.44	1261.01	1250.3	1593.1	1393.47	126.5	9477.57	8972.29	9615.57	9469.71	8158.29	1030.92	1193.58	1431.28	1029.26	998.695	2670.78	2737.7	3380.64	2492.12	2529.68	1243.92	1106.15	1117.88	1122.78	1523.44
Ras+related+protein+Rab+3B+OS+Homo+sapiens+GN+RAB3B+PE+1+SV+2	24986.1	6114.69	5	RAB3B_HUMAN	22865	19512	21659	17761.1	23950	29947.3	28335.7	30786.7	26514.5	28799.3	22511.3	15442.3	17947	19454.3	19551.7	11186.9	22510.7	20152	20318.3	22416	17428	24021	25446	25132.7	26412.3	9221.51	11718.6	16496.1	10797.3	13218.3	22164.3	23771	23897	24421.7	24447.7	17565.4	18543.7	18763.7	19806	19048.5	10617	8234.73	6678.77	12773.7	7894.24
Ras+related+protein+Rab+3C+OS+Homo+sapiens+GN+RAB3C+PE+2+SV+1	26180.4	1723.61	2	RAB3C_HUMAN	2831.22	2940.96	4326.65	2523.53	2507.05	4510.94	5344.66	4315.94	4103.5	3928.07	2097.8	1545.08	3439.59	2281.66	2350.6	5345.77	5733.62	4766.11	9225.04	5038.89	11777	11677	12031	13014.1	1181.43	1879.38	1373.42	1638.45	1449.56	1248.82	5669.76	5121.12	5502.83	7392.32	5492.52	10748.1	11017.4	10991.6	10029.1	10180.3	11104.1	9874.29	9979	10022.7	9800.43
Ras+related+protein+Rab+5C+OS+Homo+sapiens+GN+RAB5C+PE+1+SV+2	23710.7	2638.22	2	RAB5C_HUMAN	27668	18180.5	28314	18107	28410	19394	31121.5	15397	29892	16042.5	15708	20554.5	17384.3	20475	22607.7	17693.3	20265	24972	27806	13377.5	29464	26908	21132.5	22034.5	30130		22290.5		18058	24156	15616.5	16608	16526	15961	17199	29510	25018	24892	26597	26302	33444	25595.5	20531.3	33810	22956.5
Ras+related+protein+Rab+7a+OS+Homo+sapiens+GN+RAB7A+PE+1+SV+1	23774.9	1421	2	RAB7A_HUMAN	29953	33382.5	32225	33098.5	27218	32197.5	37093	34414	35669	38371.5	29060	22571.5	26050.5	26388.5	32478.5	33723	22054	35393.5	30131	27074	52842	56247	52331.5	51379	50532	17216.5	22357	37282	36238.5	19851	43742.5	36696.5	27617.5	63713	46273	50699.5	50164.5	43856.5	44576	49004	31281	26511.5	21937	21517	32191
Ras+related+C3+botulinum+toxin+substrate+1+OS+Homo+sapiens+GN+RAC1+PE+1+SV+1	21849.3	2205.59	3	RAC1_HUMAN	33721.6	37788.6	41910.8	40474	35062	36560.8	40063.4	39760.6	39348.8	36038.8	29704.9	27892.7	35066	35216.8	32192.4	38030.6	39067.9	36419	36284.3	37889.1	39468	35408	48682.5	46663.5	45567	16058.9	24351.4	23766.6	26043.1	34302.5	36349	35668.6	35183.2	41635.1	35191.6	32098.5	27793.7	34096.3	26500.1	28920.6	36939.6	32729.6	35513.1	36188.8	33309
Radixin+OS+Homo+sapiens+GN+RDX+PE+1+SV+1	68678.1	2404.87	14	RADI_HUMAN	26609.7	19665.4	18496.1	18867.6	15656.4	33417	20652.8	17539.7	18142.3	16564.6	16999	19838	23962	23425	21211.1	26201.3	19192.2	19519.7	17252.3	15072.7	19629.7	15872.5	15848.3	15562.7	20892.3	45289	16954.7	20875.7	16375.3	17326.7	15857.2	18524.3	16602	16225.7	16847	17718	16331.3	15972.7	17419	16482	17808.4	17885.8	16797.1	16816.5	18218.5
GTP+binding+nuclear+protein+Ran+OS+Homo+sapiens+GN+RAN+PE+1+SV+3	24594.2	5927.43	7	RAN_HUMAN	93512	86556.3	83676	85346	98228	90531	94424	101892	97521.7	96588	69930	73384.3	77506.3	68585.7	79065.3	84842	79521.7	97973.3	95492.3	86207.3	97994	113768	109155	115158	129525	122211	130838	118433	114819	108907	106096	110171	102876	102034	107658	119810	132676	131058	113150	120233	134178	133587	129049	139699	120635
Ras+related+protein+Rap+1b+OS+Homo+sapiens+GN+RAP1B+PE+1+SV+1	21052.9	3504.61	3	RAP1B_HUMAN	32892.7	36282.7	36238	27125.5	36144	29023.3	29188.3	31591	21397.5	32272	36056.7	32442	36183.3	32549.3	32625	30994.3	36263	36560.7	39448	44206	21176	13924	27176	21666.5	19528	14806	14489	13313	14652.5	9348	20728	30571	30232.5	29480	14619	32590	27967	31957	27698.5	31010	30171	22624	1573	17891	20728.5
Putative+RNA+binding+protein+3+OS+Homo+sapiens+GN+RBM3+PE+1+SV+1	17170.4	4572.1	2	RBM3_HUMAN	59800	55224.5	55242	55277.5	52282.5	66201	68271	69763.5	61365	69860	43810.5	48696.5	51660	45961.5	49910	53727.5	51995.5	53878.5	51926	51715	69096.5	64922.5	68427	66916.5	58304	66966.5	69798	68163	69281.5	66601.5	59158.5	58912.5	59532	56405	52838	78137.5	74947.5	75442.5	76402	70905.5	65290	66221.5	65325	67107	66594
Heterogeneous+nuclear+ribonucleoprotein+G+like+1+OS+Homo+sapiens+GN+RBMXL1+PE+1+SV+1	42198.7	1446.39	2	RBMXL_HUMAN	60286	33105.5	33270	33376	29356	30220.5	35314	37896.5	34934.5	33494	53647	27978.5	27397.5	51302	48037	36248.5	38239	35917.5	34491	28858.5	46185.5	46850.5	46867	41187	44758.5	44459	44235	45439	46722	12978	26080.5	33800.5	33017	30285	32198	34501.5	37961	38262.5	35058.5	34632.5	29314.5	28282.5	31524	30810.5	28937.5
Reticulocalbin+3+OS+Homo+sapiens+GN+RCN3+PE+1+SV+1	37493	1882.54	8	RCN3_HUMAN	38788.3	37455	27109	34600.7	21461	24179.7	27205.7	22370.7	24777.7	15657	29516.3	36372.7	35720	35112.7	34018	39323	39050	36802.3	37600	20461	12741.3	18264.3	19349.3	16926	20301.3	15046.5	6424.5	3778.5	5955.5	16296.5	31319	35078	32537	33642	15411.3	12834	12609	12231	12483	16047	9153.67	5621.67	6830.33	4104	7101
UV+excision+repair+protein+RAD23+homolog+B+OS+Homo+sapiens+GN+RAD23B+PE+1+SV+1	43228.3	2746.65	8	RD23B_HUMAN	35208	33221	33772.7	32310.7	37462.3	22564	15086	22815.3	29798.3	32719	27257.3	30865.3	30677.7	27509.3	25008.7	32439.7	29171	31428.3	30033.7	31708.3	33979.7	21057	20578	20579	29359.7	10769	28049.3	25500	14129	16808.3	31551.7	29067.7	33922.3	34506	35341.7	24364.7	22825.3	29894.7	30526.7	18491.3	16598.3	17100.3	22593.3	21906.7	10683
Rho+GTPase+activating+protein+1+OS+Homo+sapiens+GN+ARHGAP1+PE+1+SV+1	50492.8	1618.17	3	RHG01_HUMAN	25659	30866	24123.5	30862.3	27247.3	27931	28715	27771.3	24717.5	28616.7	26173	21476.7	20092	19568	17634.7	26884.7	26845.7	28108.5	21987	28980	20551	22102	22829.7	17631.5	14618	18885.3	10322	22433	25190.5	19483	27570.5	31971	31017	30439.3	28985	20328	22691.5	24470	28704.5	8106	15747.5	14240	19699.5	11027	21625
Transforming+protein+RhoA+OS+Homo+sapiens+GN+RHOA+PE+1+SV+1	22110.3	9833.95	6	RHOA_HUMAN	28191.4	23339.8	24067.8	22814.9	35314.3	39343.6	31264.9	41037.6	42458.7	36549.8	34133	35251.4	36835.1	24355.4	30956.6	28361.6	23563.9	36501.4	29687.5	22447.6	42519.8	42458.4	42630.4	46988.3	45604.2	26988.4	26490.3	26195.4	26888.6	28378.5	27805	37191.3	27493	38190.9	39480.2	27895.1	42246.9	30326.2	27717.7	30275.3	21711.7	15735.8	16747.5	16359.3	13735.2
Rho+related+GTP+binding+protein+RhoC+OS+Homo+sapiens+GN+RHOC+PE+1+SV+1	22348.6	4073.51	6	RHOC_HUMAN	36883.6	37731.7	38187.1	33899	26660.7	33099.1	33993.2	31072.4	31827.9	33302.6	28880.7	23312.6	31268.9	32473.6	32254	35292.8	35582.6	37089.6	36476.5	31702.4	12376.5	13257.8	14126.7	15204.2	13358.2	20872	19883.6	18999.7	19362.2	18766.1	34183.4	29771.7	32872.9	22932.9	24669	31066.9	31929.1	31178.9	30018.4	31850.8	27825.6	26463	19152.5	18424.7	15060.1
Ribonuclease+inhibitor+OS+Homo+sapiens+GN+RNH1+PE+1+SV+2	51798.4	4166.58	18	RINI_HUMAN	60880.3	57246	55222.7	60463.3	55756	52785.7	53018.7	51102.3	54486	53949.3	46382	46905.3	53779.7	49056	48252	52803.3	59821.7	53479.7	52134.3	50969	42883.7	43587.7	44510.3	39197.3	41281.3	45829.3	42826	43578	40566.3	41055.7	52125.7	61966	56835	56994	58124.7	56112.7	40464.3	49268	47189.7	47858	30498.7	40968.7	38097.3	39384.7	38175.7
60S+ribosomal+protein+L10a+OS+Homo+sapiens+GN+RPL10A+PE+1+SV+2	25002.4	2866.65	4	RL10A_HUMAN	39574.3	37509	39721.3	41803.3	44391.7	39617	43817	44610.3	44116	50742	32539	33343.5	25475.3	29568	31467.7	37288	35575	37820.3	37430.7	41612.7	57089	60378.7	53190.3	54246	56844.7	53825.7	46017.7	48067.7	48040.7	47656.3	33781	35379.7	35383.7	35726	33728.7	58631.3	58090.7	61782	58792.3	75861	46315	42649.3	47570.3	46262	46942.7
60S+ribosomal+protein+L10+OS+Homo+sapiens+GN+RPL10+PE+1+SV+4	25060.2	3180.13	5	RL10_HUMAN	45617	48055	49841	50700.7	55898	37810.7	42210	42576	54753.7	60792	41123.3	41568	47774.7	31307	33363	44579.3	45472.7	48443.3	48352.3	38337.7	79489.7	80251	79584.3	79586.3	76647.3	66868	61543.3	61390	62639.7	56082	51403	44317	59615.3	45375.7	56336.3	80462.7	79073	73763.3	56802.3	53853	60594.7	65766.3	67317.7	65738	63364.3
60S+ribosomal+protein+L11+OS+Homo+sapiens+GN+RPL11+PE+1+SV+2	20480.5	6953.79	6	RL11_HUMAN	61992.3	57418.3	65378.7	59785.3	65290	64713.3	67448	69057	69506.7	73277.7	55340	44437.7	42265	40912	51016.3	53672.7	63957.3	56213.3	63514	64344.3	89359	71908	89157.3	87576	75855.3	75719.7	69144.3	74656.7	71134	63403.7	64440.3	60294	58412	59553.3	63408.7	94161.7	92505.7	86646.7	88835.7	89308	75856.7	79839.3	79325	74796	77231.3
60S+ribosomal+protein+L12+OS+Homo+sapiens+GN+RPL12+PE+1+SV+1	17989.7	11463.3	6	RL12_HUMAN	94420	71015	74428.7	71194	71480.3	68015.7	71231.7	69698.7	69809	68821.3	52810.3	56657.3	55672.7	54243.7	49239	71171.7	70695.3	69270.3	67795.3	60627.7	94912.3	95078.3	97092.3	93654.7	90604.7	70067.3	70636	62287	68816.3	65692.3	71664.3	66238.7	63092.3	66189.7	65347	78201.3	79853.7	80969	71972	71531	73138	74622.3	71421.3	69828.7	68351.3
60S+ribosomal+protein+L14+OS+Homo+sapiens+GN+RPL14+PE+1+SV+4	23545.9	4138.42	3	RL14_HUMAN	55713.3	59972.7	61629	58161.7	46118.3	62984	68888.3	66604	68943.7	50840	65767	65496.5	50406.7	48348.7	55532	58164.3	59286.7	62373.3	49829.7	50240.7	94967.3	74878	88344.7	90185.3	84764	58941	56346	57296.3	63541	57615.7	49776	43956	54812	53017.5	41175	83827.3	34978.7	85249	33924	68995.7	65425.7	75605.7	81172.3	77492.7	77012.7
60S+ribosomal+protein+L15+OS+Homo+sapiens+GN+RPL15+PE+1+SV+2	24260.2	3913.13	5	RL15_HUMAN	34540	30395.3	28217	28521	36640.3	48241.7	48059	46938	48987.7	46617.3	24922.3	25636.3	25192.3	26000.7	25279.3	36043.7	33185	38829	31805.7	29201	58270.7	52146	57823.7	56492.3	55116	44371	44143	44625.7	45467.3	43891	28334	34029.3	34384	34032	31719.3	61024	61462.3	64302	62316.3	65583.7	51743.3	65208	48299.7	52280	46951.3
60S+ribosomal+protein+L17+OS+Homo+sapiens+GN+RPL17+PE+1+SV+3	21625.2	1823.14	2	RL17_HUMAN	51794.5	47991	51124.5	54988.5	42148	55667	58660	55366	54912	64102	46444.5	46245.5	46181.5	45324.5	46534	52938	52691	49094	57439.5	56777.5	61732	61625	51157	64695.5	68053.5	64751	49221	45253	47836.5	47874	31387	50747.5	52043	50058.5	19712	68128	70502.5	48071.5	49330	68492	55241.5	58436.5	55920	55565	55901
60S+ribosomal+protein+L18a+OS+Homo+sapiens+GN+RPL18A+PE+1+SV+2	21047.5	2702.63	4	RL18A_HUMAN	53472.7	53772.7	52038.3	52919.7		57657.7	55915.3	53741.3	56798.7	63989	51582.5	53013	52961	49055.5	45096	53229.7	50829.7	50370	54181	59778.7			49852			34622	6274				49859.5	49766.5	60419	58431.5		67282	67154	67192	66257.7	79857.3	64240	54280.3	57546.3	54334	63529.7
60S+ribosomal+protein+L18+OS+Homo+sapiens+GN+RPL18+PE+1+SV+2	21748.6	5374.59	5	RL18_HUMAN	109224	105682	108775	106506	93548	101976	104879	106595	107209	103254	74567.3	74989	85884	70317	85265.3	108809	102259	102569	106697	100556	157815	156958	155939	139427	154998	114025	114965	109577	116753	113589	73546	77151.7	56004	74723	75828	132484	131698	136151	137743	88542	129747	131937	129069	124084	126584
60S+ribosomal+protein+L21+OS+Homo+sapiens+GN+RPL21+PE+1+SV+2	18621.9	3930.3	2	RL21_HUMAN	104784	100186	36251	52311.5	91562	99893	91868	97851	37538.5	41806.3		43653	54605	62498	61557	80857	85449	32880.5	89371	86339	110766	74508.3	113518	112840	107502	84097.5	123306	55817	86379.5	81852	17031		64181.5	68838.5	46753	95386.5	49112	76437	97785.5	69186.7	93863.5	63466	68294	87937	89565
60S+ribosomal+protein+L22+OS+Homo+sapiens+GN+RPL22+PE+1+SV+2	14844	15087.5	5	RL22_HUMAN	99705.3	94654.3	96141.7	97400	86414	97314.7	96613	93904.7	94149.3	73837.7	76139.3	86863	87353.7	88339	84176.3	94066	98046.3	103519	101235	100875	117615	145848	138926	130823	145162	95430	102570	104549	101382	95574.7	93787.3	91346.7	90713.7	86731	88983	102178	76186.7	84283.7	98764.3	83737.7	92376.7	82978.7	63856.7	69628.3	65177
60S+ribosomal+protein+L23a+OS+Homo+sapiens+GN+RPL23A+PE+1+SV+1	17695.1	3166.6	5	RL23A_HUMAN	77598.3	88077.7	89870.7	122862	89682.7	102839	93328.3	92873	91649	90226.3	92834	89445	96629	194676	109397	107302	89116.3	94276	122917	105568	154326	160266	110166	93932	113055	114464	114887	166760	121864	105178	62502.7	58864.7	65335.3	65191	84224.3	103109	91446	124081	116606	103917	121170	119630	123417	146706	166608
60S+ribosomal+protein+L23+OS+Homo+sapiens+GN+RPL23+PE+1+SV+1	14979.5	9685.26	7	RL23_HUMAN	65742.3	62074.3	67382.3	71618.7	80668.3	58647.3	99348.7	81086	61604.3	81825	51331.7	86152.3	50812	54345.7	85320.3	62915.7	84434	89578.7	71136.3	97769	131599	128486	130915	128943	120586	46308.7	78742.7	76990	81326.7	46704.7	60165.3	65757	68522	62691.7	50847.7	101808	99607.7	113257	117216	113286	93614.3	87779.7	82189.7	54736.3	83065.3
60S+ribosomal+protein+L24+OS+Homo+sapiens+GN+RPL24+PE+1+SV+1	17893	3798.58	2	RL24_HUMAN	35150	34344	33111	34735.5	35666.5	37617	33519.5	35106.5	34650.5	33356	26323.5	25332	25338.5	27754.5	27151	34450.5	31778.5	31484	32030.5	29322.5	57724	45954.5	36693.5	49861	33279	19624	29215	28662.5	40325.5	25886.5	26476.5	26859.5	26095	21788	28145.5	48431	46608.5	41609.5	42206.5	37045.5	46980.5	51350.5	50710	50158	46783
60S+ribosomal+protein+L27a+OS+Homo+sapiens+GN+RPL27A+PE+1+SV+2	16675.5	3428.53	4	RL27A_HUMAN	55891.7	49325	62053	61044.7	63659.7	57606.3	55208.7	62361.7	62032.3	55909.3	55578	44244.3	45559	45703	51251.7	55748.7	57794.3	58990.7	65435.3	61979.3	77461	82853	90111	95764	97623.7	55884	57298	65066.7	56844	59259	60495.3	59892	57510	54083.3	56671.3	59759	69936.3	72645.7	72003	67476.7	54884.3	52343.7	51310.7	64101	53815
60S+ribosomal+protein+L27+OS+Homo+sapiens+GN+RPL27+PE+1+SV+2	15797.8	3608.28	4	RL27_HUMAN	52829	52719.3	50802	45122.3	61757.7	48282.3	55471.7	54524	58032.7	64589.7	43381	46005.3	36036	49435	50251.7	32082.5	51524	30919	53166.7	60219	82757.3	84855	83354	88839	73943.7	45472	47315.7	47778	46484.3	46905	50061.7	50194	47775	56006.5	36448.3	68685.7	71151.3	75196.3	72061.7	73623.3	50049.7	47612.7	51322.7	46923.7	51397.7
60S+ribosomal+protein+L30+OS+Homo+sapiens+GN+RPL30+PE+1+SV+2	12955.2	16139.1	3	RL30_HUMAN	85840.3	92652.3	81814.3	91387.7	80239	88624.3	94778.3	93141.7	91159.7	89883.3	72725.3	66262.3	76793.3	75751	79894.7	74863	89466	72245.3	86486.7	89152	110594	132992	141178	69208.5	70111	89614.3	96414	99399.7	100438	97900.3	83538.3	82893.7	78315.3	80869.3	92819	115571	123394	113503	121596	119799	98472	100291	95872.7	55887.7	90386
60S+ribosomal+protein+L31+OS+Homo+sapiens+GN+RPL31+PE+1+SV+1	14462.9	4336.48	3	RL31_HUMAN	28631.5	20808	37840	49414	47493.5	56174	45801.5	48066	72199.3	79763	36361.7		42250.5	64576	23439	13145	31399.5	33504	34868	39888	59498	56484	59071.5	66385	46865.7	39281	44198	41507	43197	52967.5	31943	33684	42007	43193.5	44117	58526.5	58466	58182.5	56917	60420	53358.5	47621.3	53161.5	54275	53124.7
60S+ribosomal+protein+L32+OS+Homo+sapiens+GN+RPL32+PE+1+SV+2	15973.9	3683.5	5	RL32_HUMAN	35428.7	52896.7	60059.3	37667.3	60286.3	57201.7	64907.3	66392.7	65533.3	60702	36151.3	48232.3	46997	50786	59786.7	63735	55074.7	64699.7	54793	59152.3	82433.3	84495	84824.7	80731.7	82468.7	67501	65386.3	65525.7	63422.3	58436	37217	53952	54345	59045.3	49989.7	86960.3	83148.3	70319.7	68406	74747	54423.7	59774.3	53973	54924	63061
60S+ribosomal+protein+L35+OS+Homo+sapiens+GN+RPL35+PE+1+SV+2	14551.5	2275.01	2	RL35_HUMAN	43957	63698	44099.5	46081	6886	44563	47987.5	45766	44703.5	47806	54301	30541.5	35594	32450	38666	44492	49463.5	43810	45365	42634	95937	79323.5	81300.5	94503	97310.5						33321	38547	39813	40187	44144.5	55062.5	60051	58111.5	55463.5	57223	61597.5	49286.5	58606.5	57867.5	46990.5
60S+ribosomal+protein+L3+OS+Homo+sapiens+GN+RPL3+PE+1+SV+2	46394.1	3818.12	15	RL3_HUMAN	68570	75656.7	70058.7	66264.7	89853	76299	78957	77952	81619.7	94607.7	59576	62255.3	60087.7	57723.3	61059.7	67401	67530.3	67797.3	70329.3	74184.3	119597	118829	111266	113806	112077	52001	78896.3	74105.3	77118.3	75301.7	74239	90529.3	43698	89865	84342.7	113024	115914	110670	110558	95080	104343	101113	100271	97887.7	75593.3
60S+ribosomal+protein+L4+OS+Homo+sapiens+GN+RPL4+PE+1+SV+5	47982.5	6269.44	14	RL4_HUMAN	75994.7	76319.7	76887.7	74641.7	86982	78862.3	81448.7	80239	79484.3	88874.3	55825.7	55689	54367	54793	57429.3	72342.7	71237.7	71585	72776	66582.3	136346	143628	147013	148637	146205	90728.7	94522	94210.7	97056.3	89832	61301.3	68559.3	64181	70177.7	68909.7	108800	111656	108749	109874	111185	99170.7	102016	103287	100475	105474
60S+ribosomal+protein+L5+OS+Homo+sapiens+GN+RPL5+PE+1+SV+3	34590.8	4084.82	9	RL5_HUMAN	69632.7	70941.7	72072.7	74705	74637	74159	74379.3	74925	75899	79487.3	33326.7	50571.3	52989.3	54346.7	52687.3	68053.3	65171	68725.7	69103.3	69366.3	90488	91971	95541.7	96672.7	79351.7	74626.7	78124.3	66073	69436.3	71396.3	71854.7	73370.3	71975	72802	76742.7	99440.7	106622	144116	98703.3	93159.3	80000.7	77357.3	69614.7	67021.7	80952.3
60S+ribosomal+protein+L6+OS+Homo+sapiens+GN+RPL6+PE+1+SV+3	32785	4939.45	10	RL6_HUMAN	46333.3	49982.3	46871.3	46032.3	50841.7	48544.7	49193.3	48981	47616	49936	41209.7	42245.3	42588	31605.7	31376.3	45745	48272	44492	45942.7	44310.3	79771	73595.3	75175.7	73915.3	73541.7	53258.3	54711	54787	52836.3	48474	32924.3	40542	36630.7	30709.3	42559.3	61098	57924.7	61155.3	54023.7	56137.3	70052.7	69549	67002.7	67319.7	65543.7
60S+ribosomal+protein+L7a+OS+Homo+sapiens+GN+RPL7A+PE+1+SV+2	30166.7	3666.84	6	RL7A_HUMAN	56090.7	55717.7	59707.7	62401	65011.7	52947.7	71035	56990.7	78755	76258.7	69205.7	72530.3	64525.3	48100.3	51722.3	75168	71934.7	73400.7	80454.3	81492	97585	100248	90417	116426	101315	64885.7	55393.7	71027	73433.7	74661	76149.3	55618	51797	72670.3	99236	75645.3	80495	78940.3	83062	84066.3	91350	67199	74680.7	56505	51681
60S+ribosomal+protein+L7+OS+Homo+sapiens+GN+RPL7+PE+1+SV+1	29282.9	9140.66	11	RL7_HUMAN	75175	81315	80419.7	86355.3	78923.7	92539.7	89824.3	95065.3	67287.7	85498.3	65820.3	64416.7	68384	67700.7	67490.3	79840.3	85011.3	87645.7	87708.7	87169.7	109304	115827	92576	114088	107330	91038	91809	88514.7	92444.3	88046.7	64896.3	64685	65556.7	65200.7	65395.3	117541	117156	117080	119033	117609	102236	104929	103342	102897	102760
60S+ribosomal+protein+L8+OS+Homo+sapiens+GN+RPL8+PE+1+SV+2	28252.8	4668.23	7	RL8_HUMAN	66086	64614.3	65399.3	64434.3	68891.7	73942	73443.3	72512.7	70962.7	68477.3	53439.3	55204.7	56047.7	55456.7	56577.7	62596.7	66387.3	66865.7	66562.3	65128.3	88042.7	83076	91733.7	82023	83645	44252.3	65393.3	66044.7	65643.3	66354.7	54403	57120.7	45812	57515.3	45164.3	84956.7	84245	81572.7	84424.3	81090	38008	72218.3	69955.7	39175.7	72649.7
60S+ribosomal+protein+L9+OS+Homo+sapiens+GN+RPL9+PE+1+SV+1	21977.5	8336.51	6	RL9_HUMAN	63319	60441.7	76663.3	79561.3	75192	58352.7	67998.3	79780	78314.3	81053.7	61573	67322	54080.3	48627.3	69894.3	62301.7	62264	64621.7	78142.3	74349	110867	106640	111699	105934	90926	85212	80963	86203.7	79431.7	86053.7	76593	81686.3	78097.7	84013	79994.3	117771	118676	119925	116804	122336	62365.3	96416.7	74569.3	99786	92213
60S+acidic+ribosomal+protein+P0+like+OS+Homo+sapiens+GN+RPLP0P6+PE+5+SV+1	34535.6	6373.49	9	RLA0L_HUMAN	13795.1	12767.3	12121.3	14123.4	13103.8	13969.3	13939.2	12759.2	14626.6	14127.2	9992.79	11696.6	11828.1	12981	13441.7	15397.5	13092.9	13498.9	14474.7	13488.3	21702.1	18472	16716.9	18743.3	19629.9	17962.7	20378.3	18701	18993.2	16912.2	15523.4	14508.9	14175.5	15922.2	16640.2	13598	15537	15312.2	15271.3	17466.7	20262.6	21335.8	21492.7	21258.8	22138.1
60S+acidic+ribosomal+protein+P0+OS+Homo+sapiens+GN+RPLP0+PE+1+SV+1	34444.7	12433.5	14	RLA0_HUMAN	109211	118511	107786	111637	115529	124116	118843	115272	113648	109862	87802.6	98722.7	108732	109266	102386	113719	121876	113064	112143	115612	136741	132930	128592	130515	130877	128392	129227	126643	115590	121091	105404	103570	93518.2	104511	110269	121227	127208	124710	128615	137966	96046.2	98268.8	103368	121791	110295
60S+acidic+ribosomal+protein+P1+OS+Homo+sapiens+GN+RPLP1+PE+1+SV+1	11628	54189.7	2	RLA1_HUMAN	216843	207941	213437	206489	199169	232281	232972	237959	230733	121697	80012.1	83381.7	150535	150143	83018.8	97299.8	104260	99791.1	98725.3	94231.1	125562	122950	116251	118371	116416	191969	210011	207365	203353	188842	95202.7	96551.6	95332.8	97136.5	91134.9	139023	150963	152472	157531	151342	133689	125789	63782.2	133410	73347.5
60S+acidic+ribosomal+protein+P2+OS+Homo+sapiens+GN+RPLP2+PE+1+SV+1	11665	17729.5	5	RLA2_HUMAN	118763	125873	87297.7	139521	133397	136468	129454	122018	135267	138908	57274.2	91649.3	91689	94422	99333.7	74159.8	126968	118652	117301	133144	95876.3	99241.9	97409.3	105141	171660	126606	118774	65308	119604	87364	142206	134872	132472	132553	127964	178321	178803	185464	113232	169363	54896.7	65180.3	50544.3	82476.3	58074.3
Heterogeneous+nuclear+ribonucleoprotein+A1+OS+Homo+sapiens+GN+HNRNPA1+PE+1+SV+5	38860.8	6810.19	12	ROA1_HUMAN	99648.7	100055	101075	96187.3	72591	105900	109214	103550	98278.3	98022.7	95792.3	97553.7	93694	97287.7	90296.7	106373	105885	105664	108520	98540.3	72394.7	85752	91976.7	101384	95843.3	80176.7	82591.7	74449.7	79411.7	61810.7	109043	69573.6	74789.5	112942	90228	97661.7	116675	118835	116095	122091	55177.3	57735.3	58989	60160.3	68630.7
Heterogeneous+nuclear+ribonucleoproteins+A2+B1+OS+Homo+sapiens+GN+HNRNPA2B1+PE+1+SV+2	37486.8	6359.78	11	ROA2_HUMAN	116290	82050	115455	109112	105044	118918	126959	128045	119649	120585	95483	107340	110993	105723	103645	117809	118421	108675	84843.3	111930	147305	142843	146386	142032	138681	130591	128706	122083	121800	124827	117567	115181	112564	113590	112740	178668	172980	176434	157493	161304	105772	107840	108787	106737	109649
Heterogeneous+nuclear+ribonucleoprotein+A3+OS+Homo+sapiens+GN+HNRNPA3+PE+1+SV+2	39823.1	1392.27	3	ROA3_HUMAN	10450.9	10459.5	11071	10680.8	1882.38	9802.55	10310.3	11325.3	10236.5	14461.4	4184.6	2500.04	6822.89	7183	7788.29	10245.3	11176.4	11213.5	11282.1	15157	10027.9	9952.27	10170.6	8325.59	8056.7	8382.47	8958.83	7136.62	6969.01	1369.39	14387.8	16499.1	15710.8	10838.4	10278.9	8300.83	7212.75	8150.69	8361.31	6663.94	9203.92	2537.77	3465.75	6267.25	8438.06
Heterogeneous+nuclear+ribonucleoprotein+A+B+OS+Homo+sapiens+GN+HNRNPAB+PE+1+SV+2	36339	2018.47	2	ROAA_HUMAN	30493	30286.9	28589.1	30246.8	24996.8	28372.4	29444.4	28457.3	31058.5	26564.7	20102.3	21898.4	19065.4	24755	21920.9	32118.6	31218.8	28203.1	41634.1	22645.9	25198.4	24021.9	26463	24847.4	26064.4	40134	36702.5	25735	34682.5	24901.5	32272.1	29246	30533.9	30125.6	32016	29666.7	28445.4	39025.8	29817.5	27832.8	22428.8	21529.3	21696.3	31020.9	20865.1
Dolichyl+diphosphooligosaccharide+protein+glycosyltransferase+subunit+1+OS+Homo+sapiens+GN+RPN1+PE	68683.6	1858.24	21	RPN1_HUMAN	58734.7	60914	59447	64439	53846	59057.3	63899.7	70288.3	61699.3	68198	59082	60804	62109	62755	68568.3	62884.7	65465.7	60627	58433	71285	66067.7	71359.3	76623.3	59970.3	52928.7	78834.3	97892.7	85887.7	98214.3	85535.3	72032	71723.7	71168	61329.7	55050.7	100247	90838	92527.3	96897.7	96495.3	93656	94873.7	92082.3	97719	101102
Dolichyl+diphosphooligosaccharide+protein+glycosyltransferase+subunit+2+OS+Homo+sapiens+GN+RPN2+PE	69398.1	6178.17	12	RPN2_HUMAN	40633.7	44095.7	43788.3	45670.3	58192	42812.3	48344.3	46415.3	48841.7	52161	49979.3	43891.3	45028.7	45331	43954.7	39262	42375.3	43303.7	42807	43634.3	64975	63032.3	61280.7	65154.7	50791.3	77793.7	72233	71625.3	69421	65437.7	45497.7	44946.3	59871	61194.3	59404.3	66409.3	81178	76567	83829.7	82138.7	60139.3	64442.3	68776	68705.7	80182.7
Ribosome+binding+protein+1+OS+Homo+sapiens+GN+RRBP1+PE+1+SV+4	152872	990.961	28	RRBP1_HUMAN	56166.7	56981.3	57960.3	54456.7	59027	56077.3	65361.3	60785.7	57090.3	63614.3	43270.7	50105	52791.3	49024	47860	57204.3	55739.3	56863.3	56319.3	51417.3	65774.3	69142.7	83176.7	67739.3	69745.7	66874	67529	69153.7	67117.7	67627.7	48196.7	52353	58943.7	52722	58559	64064.3	60357	65495	57915	56231.3	54600.7	54921	54603.3	48126.7	54986.3
40S+ribosomal+protein+S10+OS+Homo+sapiens+GN+RPS10+PE+1+SV+1	18897.8	2203.58	3	RS10_HUMAN	40178.7	41453.7	45837.7	41030.7	38227	39795.7	45187	47130.3	44813.3	50714.7	32667	36891.7	35391	51518.5	58721.5	62129	49274	53142.5	40370	35117.7	61385	65877.7	65495.7	59167	55410	53679	55910	51816.7	50056	54685.3	42032.7	48285.7	38443	64541.5	29183.3	61629	63679.7	68445	63106	62364	55947.3	56404	51829.7	60964.3	60436
40S+ribosomal+protein+S11+OS+Homo+sapiens+GN+RPS11+PE+1+SV+3	18601.8	5036.21	4	RS11_HUMAN	53812.7	60223.7	59833.7	64780	65646.5	61539	60878.3	65005.3	64638	67544	43863.3	43283.3	44583	44057.3	43944	58403.7	53017.7	55757.7	56490	58460	82378.3	46108.5	87773.7	87619.7	99398.3	103979	81635	104825	38488.5	78981.3	62334	59155.7	55709	52063.3	57102.7	102814	98329	92054	92236	90856	65045.7	43683.5	97198.3	97867	71139.7
40S+ribosomal+protein+S12+OS+Homo+sapiens+GN+RPS12+PE+1+SV+3	14914.2	2472.97	6	RS12_HUMAN	69228.3	73165.7	70292.7	72029.7	81137	67875	66418	64335.3	69248.3	61684.3	62089	55190.7	36053	57281	59285.7	69785.3	70278.3	70077.7	69931.3	75345	90036	88781.7	87712	61756	96319.3	79442.3	79519	91596.3	88358.7	79754.7	74826.3	83502.7	81432.7	85942	78988.3	84003.3	84066.3	79207.7	82365.7	79017.3	52516.3	48881.7	50257.7	43343.3	44072.3
40S+ribosomal+protein+S13+OS+Homo+sapiens+GN+RPS13+PE+1+SV+2	17222.3	6870.84	6	RS13_HUMAN	60189.7	60373	60750	56321.7	70151	53929.7	58445.7	57556.3	59012	58872.7	45693	46338.3	47183.7	47617.3	41226	63569.3	56094	62139.7	58552	55814	89328.3	98802	99854	97343.7	102405	67073.3	64497.7	63323	65102.3	63427	46859	59821.7	53279.7	52844	57211	72960.3	70680.3	74665.3	67567	71295.3	71954.3	68182.3	70858.3	71252.3	74616.7
40S+ribosomal+protein+S14+OS+Homo+sapiens+GN+RPS14+PE+1+SV+3	16443.8	7033.62	4	RS14_HUMAN	41518.7	38048.3	39593	42541.3	39633.3	46878.3	49002	38248	50064.3	45647	39449	38493	39251.7	39111.3	37459.7	46184	45111.3	45528.7	43150	46881.7	72689.3	72179.3	66345.3	104569	65558.5	41870.7	38800.3	43308.7	41452.3	36018.7	29453.3	33459	30623.3	33401.3	30946	63689.7	61432.7	60352	61592	61163.7	56158.3	51141.7	55094	56464.3	53483
40S+ribosomal+protein+S15a+OS+Homo+sapiens+GN+RPS15A+PE+1+SV+2	14953.6	5940.28	3	RS15A_HUMAN	88220	79412	77998	72060	43314	83110	74809	79758	80764	84294	87099	62026	62927	73313	67008.5	82381	77191	79416.5	84387	77107.5	95816.5	66294	63188	66188	62695	81347	47256	44096	49334	44278	92232	90010	91529	109984	42007	97879.5	69163.3	65184.7	98804.5	66527.3	75995	88640	87419.5	85838	85660.5
40S+ribosomal+protein+S15+OS+Homo+sapiens+GN+RPS15+PE+1+SV+2	17040.2	19956.9	4	RS15_HUMAN	70514.3	76223	71142	74949.7	42658.7	72279.3	76504.3	82290	81130.3	79831.7	39009.7	33217	54092.7	55918.3	71274.3	33620.3	47430.3	69270.7	71129.3	55211.7	106701	107783	119730	117175	111196	99019.3	106431	90455	101214	93367.7	79164.3	84142	82241	83943.3	77319	112361	120542	129854	120211	121564	105348	110126	94954.3	108351	103831
40S+ribosomal+protein+S16+OS+Homo+sapiens+GN+RPS16+PE+1+SV+2	16559.4	4926.04	6	RS16_HUMAN	55095.7	54217.7	48289	52446	45751.7	51656	51112.7	55301	57485.7	47680	35715	34995	31106	48033	52500	52278	43558.7	52294.7	52092	46608.3	96395	104753	105676	106105	101582	48102	47358.3	31323	47384.3	47115.3	40510	42714.7	49792.3	51036.3	46567	52063	55764	54927.3	56819	53453	62966.3	45530.3	46988.7	47123	48018.3
40S+ribosomal+protein+S17+like+OS+Homo+sapiens+GN+RPS17L+PE+3+SV+1	15607.2	9220.89	6	RS17L_HUMAN	63469.7	65731	67630.3	62316.3	72977	63431.3	62307.7	59720.3	65389.7	65636.3	39999.7	31502.3	40675.7	43514	44678.7	35889.7	63850.7	66434	66213	61948.7	105577	109466	109150	108241	103029	81452	82703.3	77141.3	80157.7	75685.7	62939	69245	68903.3	67399	64411.3	101566	105695	107439	106484	100905	76813.7	106030	102931	105919	102755
40S+ribosomal+protein+S23+OS+Homo+sapiens+GN+RPS23+PE+1+SV+3	15978.7	5250.7	2	RS23_HUMAN	42609	39940	44363.5	43470.5	40619	49784.5	45206.5	46225	28698.5	46133.5	3940	14679	14970.5	16957.5	29105.5	32971.5	33692.5	33775.5	37609.5	32282	72112.5	68492.5	68702.5	69444	71935	43216	44259	58860	54182	69907	28680.5	30223.5	29648	27579.5	32234.5	71990.5	69191	69566.5	64772.5	72639.5	56646	58591.5	58766	56909.5	58412.5
40S+ribosomal+protein+S24+OS+Homo+sapiens+GN+RPS24+PE+1+SV+1	15423.2	3308.46	3	RS24_HUMAN	79949	77414.5	56391.7	54212.3	48837.3	84969.5	85331.5	58748.3	61050.3	59464	51390.7	49411.7	50695.7	68691	52981.7	84872	85524.5	62958	60012	56332	72896	75288.7	73128.7	73798	64716.7	64866.7	68097.7	60549	61722.7	54872.3	53185.7	53267.7	51045	51903.3	60375.5	81427	81705.3	80750	82499.3	69800	91575	67029	63958.3	64000.7	63196.3
40S+ribosomal+protein+S26+OS+Homo+sapiens+GN+RPS26+PE+1+SV+3	13300.6	7209.89	4	RS26_HUMAN	53749	49825.3	55369.7	49896	51000.3	52709.3	53939	50547.7	54448.7	55366	41997.7	46030.7	49991	47361.3	48800	50501	51508	50282.7	53613.3	54339.3	74798.3	70768.3	69963	69083.3	71355.7	45493.7	48960.3	42637.7	43708.3	56950.7	47903.7	57610	53323.3	54701.7	49712	71485	71757	54204.7	74576.7	67255.7	52420	53933.3	53356.3	51648	49682.7
Ubiquitin+40S+ribosomal+protein+S27a+OS+Homo+sapiens+GN+RPS27A+PE+1+SV+2	18307.1	20915.5	7	RS27A_HUMAN	72267	73677.7	62062.7	81126.7	132385	135203	130409	89935.7	58867.3	118785	75329	39498.7	41219.7	46932.7	53862.3	74670.7	76965.3	102531	89883	97751.7	198091	195607	198692	191588	201713	135814	138888	135006	137039	133378	114494	124974	124582	119187	130433	150923	143765	136981	139091	131209	126430	121531	115090	120267	126547
40S+ribosomal+protein+S27+like+OS+Homo+sapiens+GN+RPS27L+PE+1+SV+3	9819.35	9962.63	2	RS27L_HUMAN	36984	38079	39010	39255	18586.5	36168	36359	20715.5	36057	37875	25158	78640	30429	31217	31694	36856	37688	37941	40438	40515		50782	47922	44450	2386	24828	39558	40430	40105	36948	37599	23403.5	23323	38191	35206	47325	49970	49010	49128	49494	44994	30846.5	45787	43746	43539
40S+ribosomal+protein+S2+OS+Homo+sapiens+GN+RPS2+PE+1+SV+2	31609.6	5864.86	13	RS2_HUMAN	87129.7	82640.7	79763.3	84493.7	83512.7	88461.3	91383	86164.3	91557.3	82509.3	77366	71490.7	75359.3	68637.3	74387	92995.3	91811.3	87181	91340	82876.7	92317	97981	97618	98768	99392	75167.7	71608.3	70917	71925.3	72538.3	72910	81235.3	82758.3	82854	75004	89146.7	82772	87658.7	86525.3	88063.3	76164.3	75692.7	77424	77387.7	79361.3
40S+ribosomal+protein+S3a+OS+Homo+sapiens+GN+RPS3A+PE+1+SV+2	30173.1	5934.35	16	RS3A_HUMAN	84783.7	83371.3	78420.7	81019.7	85148.7	85908	81807.3	86073	82408.7	85294.7	52260.7	64277.7	64345.7	71570	69474	86198.3	88710.3	79698.7	83015.3	79870.3	116879	113680	115663	110457	117751	94516	92700	95260.3	90337.7	85495.7	82682.3	86372	86316	80698.7	84961.7	120758	111402	117910	102433	107930	84721.3	85614	86847.7	87387	89342.3
40S+ribosomal+protein+S3+OS+Homo+sapiens+GN+RPS3+PE+1+SV+2	26859.4	6890.84	14	RS3_HUMAN	116000	111939	107789	111891	101025	96576.3	107749	98512	102455	105781	129420	107319	101203	109386	104042	113353	116933	119050	131642	117282	139407	139676	135072	139145	136913	106268	112688	104205	112161	98709.3	96232.3	106088	106088	101721	93594.7	139398	147025	137454	123540	136724	139651	163271	148930	131731	145341
40S+ribosomal+protein+S4+X+isoform+OS+Homo+sapiens+GN+RPS4X+PE+1+SV+2	29825.9	5959.38	9	RS4X_HUMAN	93755	64599.7	64799	65114.3	90195.7	79320	71030.3	66009.7	76604	74066.7	50058	63911.3	59242.3	68956.3	64707.3	67152.3	64205	71033.7	72372	76132.3	111131	99654.3	97082.7	110186	96774.7	80602	78338.3	78735.3	91434.3	94616.3	71900	72101	61548.3	63808.7	76803.3	80526	82830	84034	84885.3	85845.7	70287.3	59310.7	78200	60559.7	66556.7
40S+ribosomal+protein+S5+OS+Homo+sapiens+GN+RPS5+PE+1+SV+4	23047.5	5285.84	3	RS5_HUMAN	79944	76506.7	44756.3	43825	82923.3	44534.3	44838.3	33997.3	43543.3	71568.7	63585	37482.3	37712.7	41532	66709.3	72957.3	42590	43485	42056.7	59411.7	95691.7	98047	115251	108648	124949	98110.7	62394.3	75971	61276	87148.7	73261	83123.5	67861	32450.3	65508.7	97255.7	103628	104657	107508	105807	85658.3	92256.3	60119	88189	89371
40S+ribosomal+protein+S6+OS+Homo+sapiens+GN+RPS6+PE+1+SV+1	28851.8	3786.11	5	RS6_HUMAN	63053	62156	61051.7	61275.7	83153	57426.3	54616	65417.3	60813	62461.7	26295.3	28472	36797.7	41314.3	32901.3	68640.3	62013.7	62381.7	62787.3	67427.3	99762.3	96442.7	97198.7	37624.7	96659	75251	73413	72363.7	74557	75645	58330	59522	58321.3	60797	56349	83845	90648.7	87052.7	88796.7	100604	67126.3	75244	74436.7	72909	84072
40S+ribosomal+protein+S7+OS+Homo+sapiens+GN+RPS7+PE+1+SV+1	22126.9	6509.72	11	RS7_HUMAN	80699.3	74430	78624.3	77025	81477.7	83253.3	83425.7	79844.3	68646.7	57985.7	46308	68099.7	64002.3	57032.7	59797	79418	78613.7	78460.7	81307.3	78048	114763	108527	111797	115534	105121	74634.7	70302.3	80348.7	74845	71190.7	82909	84172.7	81942	87554	76889	86859	87484.7	95009	103211	89423	74822.7	75285	75588.3	85936	83113
40S+ribosomal+protein+S8+OS+Homo+sapiens+GN+RPS8+PE+1+SV+2	24490.3	7885.07	9	RS8_HUMAN	86480	92510.3	83974.7	93091.3	80689	82903	83210.3	89854.3	85897.7	86907	77590.3	79514.3	72605.7	71534.7	74493.7	88155.3	92264.7	88256	91407	87997.7	126407	124286	119539	128286	113188	69590	89610.3	90862.7	91676.7	89047	77894.3	76033.7	78038	79719.7	65921	108692	106268	114214	117180	109193	87600	105836	106451	95414	92373.7
40S+ribosomal+protein+S9+OS+Homo+sapiens+GN+RPS9+PE+1+SV+3	22648.5	1000.59	2	RS9_HUMAN	21510.5	22216.5	21676.5	23549.5	25554.5	21247	21257	21444.5	21708	22379	26155	18462.5	18267.5	20489.5	19327	22339	22512.5	23185.5	23993.5	24301	28266.5	28705.5	27294	24917.5	31619	18075.5	22570	21285	21808	19547	21594	21552	21735	21150.5	21405.5	27348	27596.5	27042	27074.5	27365	23858	23819.5	23662.5	24608.5	21416
40S+ribosomal+protein+SA+OS+Homo+sapiens+GN+RPSA+PE+1+SV+4	32968.2	15273.4	14	RSSA_HUMAN	140900	138730	147144	144061	126798	146332	146289	149443	146774	156000	107669	114268	121519	119592	104160	145043	144104	140372	143775	157290	145501	134215	137623	139606	134043	122335	126678	127977	126580	117713	148369	168871	140998	136251	135111	153130	159411	162155	163602	159885	94924.7	95750.7	81820	84822.7	85860
Reticulon+4+OS+Homo+sapiens+GN+RTN4+PE+1+SV+2	130331	1663.58	9	RTN4_HUMAN	120497	92477	146638	142231	107112	140160	167733	161641	149459	110553	99395	93092	88235.7	128918	128275	141978	138918	144710	137764	99673.3	136165	141083	141936	137161	140394	88443.3	93342	92037.7	84922.7	89314.7	91891.7	93514	89964.7	93797	92591	108105	126567	129225	124428	121072	169865	167824	118853	123648	115928
Protein+S100+A6+OS+Homo+sapiens+GN+S100A6+PE+1+SV+1	10236.8	7235.45	3	S10A6_HUMAN	221781	228557	227667	275460	211206	242053	223600	203931	258292	240217	181793	145836	143396	187003	198157	231898	243313	237870	239934	166174	160953	196566	194358	188753	186254	159945	172438	115800	102286	161288	173942	166958	169628	156842	201083	206193	194092	191401	197204	196628	97903.3	53636	119509	127618	92666.7
Protein+S100+A10+OS+Homo+sapiens+GN+S100A10+PE+1+SV+2	11317.2	5763.56	2	S10AA_HUMAN	166774	165216	168600	252613	138917	116119	128136	116008	106441	96369	132700	130900	125510	137736	136918	247250	160235	154672	163223	167071	108368	143240		89869	123250		120014	127321		113659	144122	210993	203830	218462	160355	103610	124875	126687	125114		83991	75249	69834	70012	70375
Protein+S100+A11+OS+Homo+sapiens+GN+S100A11+PE+1+SV+2	11854.5	44276	7	S10AB_HUMAN	222204	226580	219348	216046	205703	165451	170110	172100	171224	147996	166074	173440	175417	172541	167662	216955	223123	216772	213959	199078	156707	171660	168034	159940	152245	196621	191145	192681	191068	167614	180197	187999	184888	180881	207379	172598	156396	175725	182555	166737	99637	106106	105716	102404	93915.7
Protein+transport+protein+Sec61+subunit+alpha+isoform+1+OS+Homo+sapiens+GN+SEC61A1+PE+1+SV+2	52721.1	1183.25	4	S61A1_HUMAN	17938.7	24035.3	21578.7	19189	26922.3	27366.7	27061	25652	25380.7	21544	19914.7	21117	9721	23697	21159.3	25093	16416.7	23648.7	22207.7	21270.7	15224	26460.7	25635	22235.7	23540	24427.7	25520.7	6737.67	26780.3	7783.33	23830.3	25055.7	22877	26766.7	17334	25617.7	27548.3	27303	29894	26815.3	24423.7	24582.7	23124.3	19230.3	9132.67
Adenosylhomocysteinase+OS+Homo+sapiens+GN+AHCY+PE+1+SV+4	48286.5	1267.64	3	SAHH_HUMAN	47142.5	35901.3	44385.3	45770.3	52571	94094	37025	50787.5	41919	43828.3	41204	46861.5	42706.5		32485	52325	34729.5	44774.7	45739.3	47963.3	54645	43232	54338	57240.5	54422.5	53373	54301	52083	29314	36232	63893	63561	60140	56337	38949.5	38450.3	45597.3	47445	42063.7	55916.5	57622	55369.7	55608.3	60310.3	59701.3
Proactivator+polypeptide+OS+Homo+sapiens+GN+PSAP+PE+1+SV+2	59937.6	4713.57	3	SAP_HUMAN	36313	37018.5	34072.5	37348.5	47419	31001	35269.5	32199	29499.5	70404.5	17400	38710.5	38647.5	41369	36080	37893	29934.5	35555.5	34308	69437.5	66306	67933.5	64514.5	66689.5	52390.3	38967.5	33213.7	40364.5	39582.5	40576.5	65553.5	60841.3	59635	62369.7	40776.5	36080	28901.5	57576.7	76634.5	39521	15571	16476	16057	50408.5	55187
GTP+binding+protein+SAR1a+OS+Homo+sapiens+GN+SAR1A+PE+1+SV+1	22480.9	4757.73	5	SAR1A_HUMAN	29261	32236	36601	32275.7	32967	29546	27823	27310	29207	28244	25729.7	26677.3	27301.7	29639	26056.3	31639.3	34808	36185.3	34120.7	33268.3	44401	44973	44330.7	46875	50658.3	35755	35658.3	33975.3	37317	45408.7	33996	35979	33014.7	30609	35549.3	40937.7	40469.7	38045	40122.3	37198.3	40027.7	40466	36858	39539	31428.3
Vesicle+trafficking+protein+SEC22b+OS+Homo+sapiens+GN+SEC22B+PE+1+SV+4	24821.5	2371.39	2	SC22B_HUMAN	30351.5	18468	32308.5	16473	19965	32417	31536.5	17358	30399.5	22335	6058	26840.5	8549	7618	17943	28514.5	30350	16677		32890	23770		27374	36153		16746	18324	17059	17288	19396	23480	25428	24922		19377	9302		23227	22332			14861		16222	17951
Protein+transport+protein+Sec23A+OS+Homo+sapiens+GN+SEC23A+PE+1+SV+2	87073.4	1390.95	16	SC23A_HUMAN	48589.3	45262.7	49945.7	54776.7	55879.3	43173.7	41076.3	45782.7	45487.3	35982.3	33700.7	32283	42596.3	37914	41840	39032.7	41653	46556.7	45133.7	42751.7	67919.3	78183	71335.3	72442.7	71985	77658	79080	73641.3	78631.3	56004	39011	40444.3	44551.3	48545.7	40857.7	64127.7	67269.7	67368	58622.3	61614.3	47821.7	59752.7	60827.3	58909.3	69173.7
Protein+transport+protein+Sec31A+OS+Homo+sapiens+GN+SEC31A+PE+1+SV+3	133984	1199.89	12	SC31A_HUMAN	34044.7	25336	25358.7	22261.7	27084.7	34292	22850.3	30570.7	31886.7	22767.3	17419	29357	24663	26092.7	20451.3	33136	24185.3	23981.7	18804.3	30028	12619	16958.3	13213.3	18206	12635.3	14087	14297	12509	22692	16655.7	31578.7	25233.7	28979.7	27309.3	28982.7	15243.7	24313.7	19392.3	24405.3	23458.7	18455.7	17864	12081.7	10907	18299.7
Septin+11+OS+Homo+sapiens+GN+SEPT11+PE+1+SV+3	49683.5	1493.01	9	SEP11_HUMAN	64110	69308	73125	82186.7	42069.7	83635	88916.7	99263.7	95362.3	96055.7	74934.3	74484	75484.7	70704.3	77367.7	68904	70805.3	72971.7	76419.7	76621	67073	71078.7	72356	66763.7	63281	44873.7	44950	50863.3	43410.7	39792.3	73377	78885	76682	80713.3	67381.3	60807	57976	58514.7	62202.7	56779	36725.3	37487.3	35477.3	35544.3	33547.7
Septin+2+OS+Homo+sapiens+GN+SEPT2+PE+1+SV+1	41715.7	5276.85	14	SEPT2_HUMAN	64586	60636.3	65365.7	72643.7	64752.3	53065.7	51935	54886	56608	50372.3	63763.7	64306	64888.7	61094.7	61646.3	63949.3	65011.3	63686.3	73374	72120.3	42670.3	43321	43417.7	40896.3	41240.7	29150.3	32174.7	31687	28432	29854.7	76726.7	73823	80941	74263	70286.3	37742.7	42570.3	41762.7	49210.7	46109.7	35275	30285.3	31061.7	27985.7	28984.3
Septin+7+OS+Homo+sapiens+GN+SEPT7+PE+1+SV+2	50965.2	3320.19	9	SEPT7_HUMAN	60174.3	59504	59955.3	56913.3	64607.3	54139	58645.7	54187.3	54775	50409	45120.3	46015.7	55314	53269.7	56971.3	56799.3	56954.3	56517.7	53040	48928.7	35080.7	30583.3	15919	22223.3	28518.5	12384.7	13420	32326.3	26329	26701	62201.7	52813.7	52042	70288.7	70022.7	33547	25545	31836.3	24880.3	29054.7	19161.5	19627	18544.3	19949.7	21049
Septin+9+OS+Homo+sapiens+GN+SEPT9+PE+1+SV+2	65686.7	2069.38	8	SEPT9_HUMAN	45802.3	53064.7	48396.3	48208	51298	50433	55237.3	52612.7	52795	55823.7	37678.7	42467	41896	41056.3	42864.3	42617.3	47973.7	44969	45762.7	43851	45622	40305.3	43097	41435.3	32283.7	43590	43628.3	46553	46324.7	41932	42222.3	49699	49545.3	52045.3	48276.7	49311	48920.3	48430.3	31818.7	50196.3	29094.3	31606.3	32908.7	34615.3	33834
D+3+phosphoglycerate+dehydrogenase+OS+Homo+sapiens+GN+PHGDH+PE+1+SV+4	57392	5053.41	20	SERA_HUMAN	78470.7	79447	78915.7	86366.7	72880.7	65243	61165.7	61740.3	67157	59987.3	66749.3	69014	67454.3	72200.7	68359.3	73222.7	76231	72820.3	79588	72547.7	69290	66892.3	64525.3	67326	66259.3	62334	53081.3	55183.7	55556	64625.3	75400	71568.3	75580.7	77722	75571.7	67887	74971.3	67411.3	67293.7	67474	50695.3	65706.7	69021.7	58260.7	73765.3
Phosphoserine+aminotransferase+OS+Homo+sapiens+GN+PSAT1+PE+1+SV+2	40821.9	4008.51	16	SERC_HUMAN	69228.7	66161.3	76171.7	65814.3	72699	65849.7	68366.3	65202.7	67845	65445	54211	53582.3	56429.7	54487.3	56623	57851.7	60336.7	57188.3	56375.7	65492.3	51707	55030.7	53892.7	52437	51769.7	51591.7	47208.3	51531.7	50559.3	40816.3	70884	65209	77951.3	72063	62197	51540.3	50577.7	51381.7	54831	49476	41868	47211	41516	41682.7	55872.7
Serpin+H1+OS+Homo+sapiens+GN+SERPINH1+PE+1+SV+2	46554.7	34271.2	22	SERPH_HUMAN	403161	405680	397046	408358	379863	318599	345795	335498	330005	335900	393494	436210	392221	390245	417171	402896	403187	391067	394924	405745	263551	268962	268439	271429	270890	159759	164847	165894	167367	167935	407899	379716	373179	396433	375109	253130	244189	234109	251991	268167	186443	190152	185823	186858	192664
Protein+SET+OS+Homo+sapiens+GN+SET+PE+1+SV+3	33488.9	2349.93	4	SET_HUMAN	46304.7	45395	40526.7	58832	50538.5	47978	54213.7	48755.3	72432.3	56514	42891.3	41459.7	26183	42342.3	29161.7	48935.7	50988.3	68271.3	46721.5	49968	57889	50805.3	61347	32742.3	27305.3	73946.7	74083.3	75698.7	61887.7	55215	64973	53474.3	52451	53622.7	51060	60898	63241	65938.3	66535.7	61867.3	52952.7	54384.3	57645	53686	55240.7
Splicing+factor+proline+and+glutamine+rich+OS+Homo+sapiens+GN+SFPQ+PE+1+SV+2	76263.6	2247.78	8	SFPQ_HUMAN	32898.3	29889.3	42229.7	59643	35892.7	36709.7	28500	32340.3	59303.3	44242.7	28134.7	27299	21658	21439.3	21677	36551.7	33249.3	32884.3	35641	50312	43273.3	41160.7	41938.7	41434.7	45439.7	30533.7	34885.7	37151.3	38984	27109.3	50783.3	45537	44256.7	41261	38260.3	40270.3	43529.7	40154	44108.3	49538	46369.7	47595.7	46524.3	33098.7	36086.7
Sideroflexin+1+OS+Homo+sapiens+GN+SFXN1+PE+1+SV+4	35904.6	2785.88	4	SFXN1_HUMAN	10829.3	12162	15041.3	14067.5	14077	10875	9675	11478	8717	12560.7	10217	11151	10769.3	7041.67	11514	11021	12841.7	12509.7	12421	13410	27515	17002	20150	21332	35822	15573.7	29992.3	23757.3	26957.5	34917.7	12635.3	15170.7	12884	13576	13866.3	21278.3	24024.5	21267	16488.7	24716.7	19720.7	28131.3	32815.7	30561	32813.7
SH3+domain+binding+glutamic+acid+rich+like+protein+3+OS+Homo+sapiens+GN+SH3BGRL3+PE+1+SV+1	10494.8	2488.72	3	SH3L3_HUMAN	49053.3	49881.3	50851.7	52175	65714.5	47700	46971	54211.3	53006.7	51725.3	9193	27807.7	28029	28355.3	10521	51085	49431.7	48791.7	50449.3	50738.7	48757.3	74872	34386	70928.5	10272.5	50764	57595	48489	27441.5	10667.5	52367.7	52138.7	52148	73036.5	52417.7	49215.3	47298.7	49395.7	50063	49100.3	20490	22794	31629	23242	22651.3
Small+nuclear+ribonucleoprotein+Sm+D1+OS+Homo+sapiens+GN+SNRPD1+PE+1+SV+1	13281.6	30177.3	3	SMD1_HUMAN	50992	54223.3	55761	54857	41019	34705.7	62461	62518	43324.3	39706	51019	43691	22973.3	41433	29497	30913.5	46699.5	49426	49134	28839.7	47281	32812	67683.7	33858.7	46254	53886.5	40798	37980.3	38620.7	38373.3	62779	35128.5	30716.7	39688.7	37711.7	43390	45954.7	45537.7	47293.3	35843	52573.7	53092	56388.7	53821	43764.3
Staphylococcal+nuclease+domain+containing+protein+1+OS+Homo+sapiens+GN+SND1+PE+1+SV+1	102681	2604.91	26	SND1_HUMAN	53281.7	56220	42739.7	46519.3	43827.7	42839	41778	47181	57338.7	50548	49867.3	46496.7	59042	34147.3	43231.7	62197.7	46766.7	46684.3	54646	50226.3	57426.7	61010	72008	63883.7	65143.7	54007.3	59691.3	67110.3	59905	64961.3	63725.3	54099	56453	50806.7	37257.3	54639.7	51175.3	52774	49367.3	50886.7	71797.3	65057.7	60376.3	60809.3	57136
Superoxide+dismutase+Cu+Zn+OS+Homo+sapiens+GN+SOD1+PE+1+SV+2	16163.9	4575.65	2	SODC_HUMAN	34125.5	50143	39985.5	59224		46872	50222	62952	59635	61980	25854	34266	34629	35039	4845	44066	31720	33163.5	32137.5	14516.5	50878	52501	28198	27448	25910	91204	93860	94219	95396	78564.5	68690	43899	42263.5	43771.5	25081	57304.5	56361.5	58023.5	27307	20026.5	43974.5	45496.5	44248	45474.5	25892
Serpin+B6+OS+Homo+sapiens+GN+SERPINB6+PE+1+SV+3	42964.2	1498	3	SPB6_HUMAN	15105.5	17475	15857.7	17810	18597	10887	17708	17047.7	18244.3	15634.3	12737.5	10044.7	5997	16844	13942	13407.3	16188	14289	14808.7	15871.3	9304.33	12337.5	16349	15791	10972	23435.3	23395.3	21921	16157.3	19337.5	16257	15517.7	12984.3	24377.3	12455.7	13238.3	16814.7	17701.7	21070.7	13435.7	15109.7	14874.5	12032	15623	12859.3
Signal+recognition+particle+receptor+subunit+alpha+OS+Homo+sapiens+GN+SRPR+PE+1+SV+2	70267.5	1266.88	4	SRPR_HUMAN	6278.5	6591	9221.33	8637.67	5265.33	10466	8043	9245	8502	8405.33	6185.5	5902.5	5409.5	5375	4978.5	6912.5	8076	7372	6965	7030.5	11422.7	9659.5	9901	6662	6519.33	11999.3	12354.7	11950.5	11601.3	8880	8818.33	8041	5922.67	6092	8434	10328.7	14368	13831.3	12879.7	19693	14676.3	12713	13707	13339.7	15083.7
Putative+protein+FAM10A4+OS+Homo+sapiens+GN+ST13P4+PE+5+SV+1	27577.9	2044.33	2	ST134_HUMAN	13400	21356	23835.5	25688.5	33254.5	11835	21679	22096.5	22756.5	27281	10290.5	11682	14717	18482	6275	18979	24549.5	23830	19396.5	28085.5	42060	55762	42217.5	41917	49244.5	74955	71135.5	66125.5	73098.5	48771	29767.5	33682	32225	29366.5	34305.5	36763.5	41239	42339.5	42917	39184	48728	49094.5	36704	35869.5	49990.5
Signal+transducer+and+activator+of+transcription+1+alpha+beta+OS+Homo+sapiens+GN+STAT1+PE+1+SV+2	87905.2	747.078	2	STAT1_HUMAN	15329	14680	12171.5	15240	20889	15345.5	12495.5	13840	12450	17639			11722	12547	15771	12432	13023.5	13874	14529		25207	25465	26149	24185	25472	19983	20354	13224.5	20781	3442	19707	17480	14424		20721	26971	26354	27717	25936	21062	22490	18656	37015	35530	29558
Stress+induced+phosphoprotein+1+OS+Homo+sapiens+GN+STIP1+PE+1+SV+1	63266.7	2362.82	13	STIP1_HUMAN	48802.3	47951.7	42435.7	38755.7	51730.7	49573.3	46725	43707.7	46147	40046.7	55926.7	58875.3	56745.7	59194.7	60195.3	60320	60177.7	60102	57235	59926.7	73852.3	76148.3	75000.3	74894.7	79574.3	67417.3	66745.7	68358	63220	63127.3	45000.3	52566.7	52666.3	53734.3	49506.3	64297.7	63690	62299	62808	63615.7	58749.7	58258	58551.7	60932	62732.3
Stomatin+like+protein+2+OS+Homo+sapiens+GN+STOML2+PE+1+SV+1	38648.2	4883.34	5	STML2_HUMAN	13933.3	15959	18104.3	15997.3	12323	15911.3	16220.7	14670	15679.7	16489.3	14932.7	14809.3	13817.3	14483	15691.7	13568.3	15916	16715	15471.3	16559.7	28622.3	31970	30188.3	32480	32691	29190	36100.7	34929.3	38140.7	37545	19011.7	21135.3	19820	15461.3	15986.7	23037.7	23608	18981	25363.7	24570.7	22415	25617.3	26986	27830.3	26519.7
Erythrocyte+band+7+integral+membrane+protein+OS+Homo+sapiens+GN+STOM+PE+1+SV+3	31901.9	2857.34	4	STOM_HUMAN	20775.7	22386.3	20794.3	20574	21295	26962.3	22458	20359.3	14335	28137.7	22737.3	21735	25572	28516.3	24750	20672.3	26615	19174	12002	27216	11569.7	15329.3	14792.3	21630.3	17030.3	10604.3	11376	11937.7	19688.7	9848	33590	28369.7	20539.7	28667.7	17383.3	21597	21725	20620.3	14079.3	15256.7	16036.7	9310.67	20859	22304.3	17428.3
Surfeit+locus+protein+4+OS+Homo+sapiens+GN+SURF4+PE+1+SV+3	30622.2	4217.31	4	SURF4_HUMAN	51217	53817.7	51999.3	52680.3	31793.3	45253.3	41877.7	54141.7	46666	51373.3	39726.7	47611	49272	47591	47904.3	50018.3	54846	60564	51624	62168.7	34526	36436.3	34035	34092.7	54427	33091	34591.7	35582.3	27294.7	34469.3	61367	24839.3	37623.7	46679.7	38154	39568.7	43224	29895.3	43731.3	40764.7	34342.7	33220.3	21609	28460.7	32628.7
Alanyl+tRNA+synthetase+cytoplasmic+OS+Homo+sapiens+GN+AARS+PE+1+SV+2	107552	1876.32	22	SYAC_HUMAN	300459	348004	364927	382727	387239	386341	407326	443519	461226	502914	377507	419499	449625	478170	507467	306574	344558	360957	390961	421043	189645	189706	196756	210424	205067	191394	218496	214159	230547	248618	388670	395170	424849	419030	425137	314907	317326	321270	342168	371722	202196	150691	145579	155126	159191
Bifunctional+aminoacyl+tRNA+synthetase+OS+Homo+sapiens+GN+EPRS+PE+1+SV+5	172188	648.99	4	SYEP_HUMAN	21071.3	24174.7	20308.7	23060.7	12179	27774	18916.3	18345.3	22474	13525	23036.3	24270.7	23819	24338.3	24391.7	26479	18817.7	19392	19332	18649.3	20928.7	11466.3	19607.7	16227.3	23680.7	25981.5	29680.7	8224	29114.3	38632	17427.7	24127	28693.5	11027	20979.3	31885.5	29338.3	28533.7	19934.7	27246	32166.3	29751	8327	7739.5	26797
Glycyl+tRNA+synthetase+OS+Homo+sapiens+GN+GARS+PE+1+SV+3	83907.1	3429.93	24	SYG_HUMAN	63973	73811	73200.3	76323.7	77159.7	71251.7	65422.7	72756	67600.3	69276	52107.7	68080.3	72151.3	54359	58688.7	70297	68889.7	74701	76453.3	77054.3	72135.7	72425	78933	63111.3	66734	64347.3	66318.3	62472	63119.3	55102.3	77324.7	78776.3	79677	74538	78189	79504.3	73147	82073.3	80941.7	75757.3	63940.3	76349.3	71208.3	70528	65504
Isoleucyl+tRNA+synthetase+cytoplasmic+OS+Homo+sapiens+GN+IARS+PE+1+SV+2	145810	486.898	2	SYIC_HUMAN	19022.5	19212	20478	20125	19606.5	18698.5	19529	16483	19740	18805.5		15463	16805.5	19302.5	19724.5	18069.5	16128.5	17776	18666.5	15674	17715.5	18314	15626.5	16956	18526	10827	21168	22337	24802	19883	20347	17909	19299.5	19777	16588.5	20389.5	23122.5	21674.5	22754	21110.5	16923	16388	17271	19388	16475
Asparaginyl+tRNA+synthetase+cytoplasmic+OS+Homo+sapiens+GN+NARS+PE+1+SV+1	63798.4	1421.28	4	SYNC_HUMAN	23019.7	27376.3	24194.3	33812	35560	17944.3	18416.3	22568	24989.7	28832.3	22877	13111.5	17761.7		25474	26589.3	27686	23317.3	22651.7	33583.7	36909.7	41588.7	43155.7	45087.7	38477.7	28413	35858	33926.7	27771	33910.7	35243	37119.7	36079.7	37044.7	38440.7	38240.7	38536	40417	39102.3	38378.3	34201.3	34494.3	34654.3	40329	39527.3
Threonyl+tRNA+synthetase+cytoplasmic+OS+Homo+sapiens+GN+TARS+PE+1+SV+3	84347.7	863.905	2	SYTC_HUMAN	19250	20683	24004		22135		13168.5				18450	16949	16135.5	15389.5	21618	16780	16605	22118		17728	24936	12728	10088	17921							2913	15195.5	19483	11619		9355	21624	27424	34706	28942			14433	30671
Valyl+tRNA+synthetase+OS+Homo+sapiens+GN+VARS+PE+1+SV+4	141731	978.407	9	SYVC_HUMAN	21029	22446.7	21950.7	21344	21407.7	21565	21954.3	32157.7	21348.3	30990	16199	17571.3	16610.7	10411.3	17967.3	19547.7	19544.3	19573	18040.7	19964.7	22013.3	21945.3	21048.3	24881.3	19945	24263.3	15251	14397.7	17798.3	23460.3	19437.7	26021.7	27472	29819.3	20031.7	21906	24019.3	16456.7	26033	25768.3	16921	16078.3	24530.7	27050.7	15133.7
Tryptophanyl+tRNA+synthetase+cytoplasmic+OS+Homo+sapiens+GN+WARS+PE+1+SV+2	53507.7	3775.22	8	SYWC_HUMAN	47472.7	48375	46858	40813.3	44559	36832.7	40111	35681.3	28238.7	37640.3	30190.7	39027.7	41234.3	38898	41028	42534.7	45334.7	39993	46805.7	37139.7	32154	31809.7	34329.7	34035	34336.7	25111.3	26723.7	23301.3	23931.7	29472	47071.7	46004	42788.7	41663.7	47458.7	45462.3	45143.3	39042.3	44620.7	43798.7	24826	22186.3	27998	23538	23356
Tyrosyl+tRNA+synthetase+cytoplasmic+OS+Homo+sapiens+GN+YARS+PE+1+SV+4	59485.7	729.588	2	SYYC_HUMAN	30815.5	33272	31944.5	29256.5	30746	30047.5	28660.5	25111.5	20194	25787.5	25515	29013	30393.5	26870	25769.5	28231	26496	29790	29289	26591.5	24977.5	28185	28078.5	27305.5	24093	32783	17875	20363	18999	5373	30452	30083	26914	14906.5	30868.5	23685	21823	19945	29795	29075.5	31239	28445	25835	32242.5	22516
Transgelin+2+OS+Homo+sapiens+GN+TAGLN2+PE+1+SV+3	22562.6	25078.7	15	TAGL2_HUMAN	197213	216526	208170	215981	196475	163259	162437	169356	133654	153953	142355	170872	170370	173085	165835	210374	200442	214459	210944	205563	129318	130920	127572	126296	128671	112677	113743	124204	133700	121660	215947	225908	215805	208876	216155	150221	136720	109189	112736	120226	95972	103306	101944	88201	88577
Transgelin+3+OS+Homo+sapiens+GN+TAGLN3+PE+1+SV+2	22643.8	1067.11	3	TAGL3_HUMAN	27556.7	44771.7	61276.6	63206.3	88813.3	119828	87566.7	74190.8	87641.4	110665	18839.5	11017.6	21608.8	11359	128157	15388.4	77132.4	96793.1	83173.4	89390.1	45886.5	49982.7	25926.1	63512.9	117152	37433	40100	38708.5	38350.5	35739	31136.2	84775.4	80533.7	92054.5	101351	72769.5	75500.7	78034.4	76089.2	89273.2	19739.5	25056.9	16916	17556.9	17384
Transgelin+OS+Homo+sapiens+GN+TAGLN+PE+1+SV+4	22668	9606.56	10	TAGL_HUMAN	139005	131292	121602	121580	94952.3	136552	143167	145729	144550	106490	155302	151337	158868	112827	146842	137412	128038	114456	137115	113489	29720	30346	30412.7	41073	30985.3	15788.3	11935.3	19655.3	12165.3	13434.3	108952	108294	106900	103424	96778.3	42091.3	50229	46406.7	42793	44707.3	13341.7	6754	13118.3	10941.3	5875
Tubulin+alpha+1A+chain+OS+Homo+sapiens+GN+TUBA1A+PE+1+SV+1	50820	48971.7	27	TBA1A_HUMAN	163765	165371	170514	164153	169578	160052	162817	159347	156190	148986	175753	178890	177104	170895	181014	150381	148909	152562	148342	148473	103809	103971	103260	102194	101696	110930	110994	110464	112365	113052	161062	163061	154774	158714	159037	119430	114953	116483	118142	117747	120910	120400	120315	120314	118520
Tubulin+alpha+1B+chain+OS+Homo+sapiens+GN+TUBA1B+PE+1+SV+1	50836	52259.2	27	TBA1B_HUMAN	365612	380204	387122	373442	360594	428843	445783	445086	431779	413378	351969	368989	364340	352491	378445	395874	386608	396546	387072	384369	369043	361651	361376	354568	351304	333836	340203	343515	339623	326286	391724	381502	366762	370187	363986	429065	424189	410947	409427	417522	288943	296817	279754	291119	293131
Tubulin+alpha+1C+chain+OS+Homo+sapiens+GN+TUBA1C+PE+1+SV+1	50579.7	48810.8	27	TBA1C_HUMAN	110577	114705	113681	110735	110771	130544	134379	132461	127736	132089	98611.6	100841	99725.1	96280.7	102926	123171	121930	124935	121355	121584	130586	130732	129819	128509	127782	99362.1	97936.1	98390.1	98231.2	99559.7	127130	129062	121453	129908	124409	111379	122103	108003	122088	121009	52649.2	53209.8	54861.3	52822.5	54213.7
Putative+tubulin+like+protein+alpha+4B+OS+Homo+sapiens+GN+TUBA4B+PE+5+SV+2	27836.4	10701	3	TBA4B_HUMAN	7685.21	8105.3	7619.89	4088.61	3949.65	4422.91	5145.48	3726.55	7825.84	7147.24	5862.06	6421.93	5354.87	4642.9	6393.17	5850.04	6089.76	5082.1	3739.45	4714.9	5589.42	6658.61	3484.42	5087.68	7466.15	3331.85	6053.88	4099.34	5713.13	5111.08	7044.01	6849.3	7186.08	6194.81	5708.86	6441.11	6131.03	6089.68	3802.57	6129.61	13478.1	13657.5	10063.3	13365.9	8370.49
Tubulin+alpha+chain+like+3+OS+Homo+sapiens+GN+TUBAL3+PE+1+SV+2	50707.2	1452.89	5	TBAL3_HUMAN	14707.7	7831.86	21827	14525	15444.1	12467.5	13041.7	19825.5	21125.7	5228.68	32408.8	35400.1	27481.7	27904.3	34024.5	3668.98	11729.1	17142	12246.3	13730.2	34666	45847.9	33787.1	34785.3	27505	50845.3	51223	51026.9	51903.6	51230.4	13747.5	6729.95	19320.1	6131.26	17346.5	44532.4	39219.4	40468.8	40947.1	39441.7	50827.7	52857.5	52124.9	42625.7	42119.1
Tubulin+beta+1+chain+OS+Homo+sapiens+GN+TUBB1+PE+1+SV+1	50897.3	2550.76	6	TBB1_HUMAN	23854.9	24383.9	29987	36249.7	20889.9	22992.1	24337.7	30738	27635.7	21594.3	23589.7	22420	25428.7	22325.7	24902.3	23616.2	25520.9	31683.7	36438.2	35617.6	24247.3	17502.2	16544.7	19545	21411.5	23057	22972.6	19102.3	23825.3	20872	40008.7	35002.3	33362.7	33532	26049.5	41159.7	41933	40344.3	41784.3	35948.7	39601.3	41121.7	37889	36287	38806.7
Tubulin+beta+2A+chain+OS+Homo+sapiens+GN+TUBB2A+PE+1+SV+1	50306.3	38234.4	20	TBB2A_HUMAN	40941	45542.1	44088.5	43871.2	45026.1	45198.5	47031.5	40647	45863.7	40260.4	48720.4	51058.2	50634.8	47735.6	52241.9	45849.9	49129.7	48541.3	49047.3	46633.1	32778.4	37061.2	36254.9	36065.9	36780.4	39226.4	36279.9	36119.9	36254.9	34157.7	38128.8	34150.1	36902.9	35231.5	34494.8	38492	35216.9	37107.2	34809.4	35076.5	32539.9	31269.8	29674	31330.8	30401.4
Tubulin+beta+2B+chain+OS+Homo+sapiens+GN+TUBB2B+PE+1+SV+1	50409.4	40331.8	21	TBB2B_HUMAN	11073.4	13250.9	13189.9	13086.7	14201.2	13933.7	12902	9669.63	11267.2	13524.2	13751.9	12591.7	16125.2	14329.8	14456.4	12394.7	13009.7	13758	12569.8	13786.3	17155.7	17407.2	18029.2	16942.3	17306.5	33356.2	33058.2	33526.2	34304	32458.4	16277.4	15374.5	15008.5	14767.4	13239.2	20682.6	18544	19722.4	18838.4	18164.6	31725.4	29604.6	29879.2	30764.2	30279.9
Tubulin+beta+2C+chain+OS+Homo+sapiens+GN+TUBB2C+PE+1+SV+1	50287.4	45270.2	23	TBB2C_HUMAN	163832	170681	170751	161773	187063	206879	204212	180633	203170	192318	151172	158424	157695	157549	148719	166012	149062	160282	166585	157283	140433	157813	162066	158961	155562	182927	183082	190521	187190	177623	170621	174797	170943	174011	165420	237531	236949	239752	234477	229120	189663	194598	194633	195905	185947
Tubulin+beta+3+chain+OS+Homo+sapiens+GN+TUBB3+PE+1+SV+2	50889	19513.5	17	TBB3_HUMAN	72513.5	75657.6	75445.9	75509.9	62289.1	74727.7	74784.4	78364.1	77255.2	73023.4	53828.5	57435.7	58629.7	56955.2	63714.1	65334	70821.9	67937.1	73305.6	67380.6	39269.8	47572.3	50684.1	46257.3	44838.7	52152.8	44707.1	56869.4	56767.1	53481.6	75809.7	75991.6	75147.3	75081.3	73082.6	68677	68141.4	69347	64122.7	66022.8	53074.3	55051.2	52661.3	49837.2	48889.8
Putative+tubulin+beta+4q+chain+OS+Homo+sapiens+GN+TUBB4Q+PE+5+SV+1	48947.9	13101.1	7	TBB4Q_HUMAN	10352.3	16221.7	7593.89	17764.3	16663.2	12758	15897.3	17761.3	13958.2	7305.86	4084.4	4092.49	8088.1	9144.28	11747.4	10872	10633.7	11579.4	7733.15	14520.9	15644.5	19133.1	12900.5	17041.2	17232.8	18569.9	17167.1	17578.8	16046.6	11221.4	9596.22	17523.9	15025.6	15941.7	18485.3	19052.7	20419.3	19513.7	21167	23530.5	24005.7	16120.7	17206.5	17383.3	16729.4
Tubulin+beta+chain+OS+Homo+sapiens+GN+TUBB+PE+1+SV+2	50127.2	57499	23	TBB5_HUMAN	423676	433114	428686	415861	503700	442942	445157	403260	425596	425823	377453	396474	389550	379649	398955	396416	394044	393876	365300	391293	360922	365727	364449	368145	353858	315621	317811	323564	324844	314263	453764	451257	448121	449540	438306	395290	392105	397224	397766	386890	239471	247864	243051	246534	238006
Tubulin+beta+6+chain+OS+Homo+sapiens+GN+TUBB6+PE+1+SV+1	50313.5	16498	19	TBB6_HUMAN	72136.9	76069	75158	76275.7	78731	79897.7	78016	78805.3	77876	75666.3	68337.7	68033	69591.3	69294.7	66494.3	73236.3	71984	71512	73961.3	70824	61834	62894.6	57930.1	57679.2	57058.8	52263.8	56709.1	55896.8	54407.7	54282.7	74560.7	79527.7	79252.6	78255.4	82428.1	64285.8	68962.7	67176.5	68145.4	57852	39532.8	41482.3	37794.3	48008.8	53025.1
Tubulin+beta+8+chain+OS+Homo+sapiens+GN+TUBB8+PE+1+SV+2	50289.4	10950.8	7	TBB8_HUMAN	5330.27	8406.82	9963.24	12646.2	10603	5436.06	11632.5	8888.51	10172.8	4548.54	4975.69	1870.95	3590.3	3955.14	6650.9	12092.3	7746.27	7978.32	9386.79	10927.4	26819.4	18913.1	5256.02	12531.3	5643.12	8450.2	7484.2	9075.64	7704.65	7496.47	9345.29	9098.5	9568.81	10771.6	12684.6	10864.4	3619.46	11967.5	10897.2	11222.6	11126.5	11064.7	10555	11714.9	12206.9
T+complex+protein+1+subunit+alpha+OS+Homo+sapiens+GN+TCP1+PE+1+SV+1	60856.9	5293.72	24	TCPA_HUMAN	44633.3	48752.7	50382.7	45720.3	46100.7	49850.3	52692.7	51952.3	52762.7	56663.7	26850.3	35561	38228.7	36110	39817	44435.3	45107.3	51929	49369	50550.3	61211.7	67687.7	69369	71300	69574.7	70769.3	75403	63997.7	86216	68618	47469.3	45950	46749.3	49799.3	44226.7	85406	76231	76566	92428.3	91677	57893	61438.7	73817	75173.3	76232
T+complex+protein+1+subunit+beta+OS+Homo+sapiens+GN+CCT2+PE+1+SV+4	57830.5	3702.84	26	TCPB_HUMAN	72600.7	68142.3	54332.3	66984.3	71980.7	63263	75342.3	68349	66768	69912	55601	55810.3	54645	58867	62799.3	71843.3	59841.3	61113.3	62478.7	63719	88232.7	86376.7	73302.7	82756	67951.7	85847.7	81863	86795	84859.3	86282	72367.3	64246	66147.3	70123	64410.7	90897.7	95864.3	97957	90826.7	77583	90291.7	95788.7	93973.7	90241.7	90507.3
T+complex+protein+1+subunit+delta+OS+Homo+sapiens+GN+CCT4+PE+1+SV+4	58437.6	4720.67	19	TCPD_HUMAN	73243.3	67204.7	75913	75135.7	66602	67725.3	67074.7	65377	69242	60784.7	59917.7	64645.3	66291.3	65927.7	67540	78618.3	77615.7	77282.3	83754.7	71256.3	98164	105536	84786.3	95765.7	100753	94785.3	73735.7	72142.3	74669.7	72887	67847.3	68705.3	65919	69800.7	71497	71447.3	76594.3	78787.3	76701.3	75114.7	125798	84053.3	129931	85609	85378.3
T+complex+protein+1+subunit+epsilon+OS+Homo+sapiens+GN+CCT5+PE+1+SV+1	60127.4	7148.04	18	TCPE_HUMAN	52483.3	50154.7	53982.7	58294.3	58956.7	51814	54555.3	58898	61859	64446.3	40722	43026.7	44183.3	42190	45359.7	47883.3	50560	52229	52663.7	53399.7	72722	79767.7	77969.7	77119	76810.7	82626.7	84085	81131.7	76457	85710.7	56702.3	60695	63036.7	62347.3	61126	76433.3	85866.7	81498	88899.3	82728.7	84728	84833	90187	90826.3	86494.3
T+complex+protein+1+subunit+gamma+OS+Homo+sapiens+GN+CCT3+PE+1+SV+4	61104.3	4495.19	19	TCPG_HUMAN	63313.3	56056.7	60467.7	60180.7	64566.3	60913	63046.3	56526	58355	71703	46741	58854.3	55151.3	50444.7	52100.3	57367.7	53725	55632.7	60615.7	63461.7	73905.3	82701	82647	84755	87961	86100.7	80641.3	84474.3	84146	78359	64639.3	51054	59218.7	64037.3	62845.3	85891	72712.7	65790	74485.3	86993.7	79173	81951.3	90658	72679	94734
T+complex+protein+1+subunit+eta+OS+Homo+sapiens+GN+CCT7+PE+1+SV+2	59880	4568.12	12	TCPH_HUMAN	33875.7	38258.7	37056.3	37213	41063.3	33538.7	31677.7	32219	32181.3	31601.7	27390.3	27767	29158	31704.7	30534	34616.3	37144.7	37670.7	38464	36435	47046.3	57497.7	61311	45359.3	57701	53850.7	55203.3	53296	54906.3	52726.3	30799.7	41752.3	37308	45808.7	44750.7	54595	59817.7	50411.3	55361.7	57802.3	60386.3	61855.3	61207.7	63947.3	64407
T+complex+protein+1+subunit+theta+OS+Homo+sapiens+GN+CCT8+PE+1+SV+4	60191	2172.84	23	TCPQ_HUMAN	66057.3	60418	64375.3	61290	51569.3	61292.3	76378.3	72725.3	72448	52063.3	50681	48758.7	53541.3	42587	49461.3	61553	62174.7	64267.3	60492.7	60992	83972.7	121134	86323.7	85591.7	77255.7	82333.3	86511	87982.7	88243.3	89486.3	50768.3	61016.7	50635	51559	51427.7	100343	96226.3	93461	85277	96774.7	91298.3	94659.3	97623.3	110458	88816.3
T+complex+protein+1+subunit+zeta+OS+Homo+sapiens+GN+CCT6A+PE+1+SV+3	58480.5	5830.24	19	TCPZ_HUMAN	47591.7	49694.3	47015	52061.3	44021	51166.7	46363	48327.7	44644	47166	33765	40688.3	38155.7	41745.3	41530	49998	50438.7	46047.3	49542.3	52759.3	81852.3	90525	89260.7	88210.3	88584	87703.7	86957	86579	84231	74212.7	51173	49906.3	59025	52303.7	59090	85445.3	76926.7	69033.3	66807.3	84637.3	91920.7	87957.3	88630.7	89228.7	92064.7
Translationally+controlled+tumor+protein+OS+Homo+sapiens+GN+TPT1+PE+1+SV+1	19709.5	7441.97	7	TCTP_HUMAN	56051.7	60106.7	60980	59042.7	67169	50495	54013.7	55506.3	56231.3	61112.3	34932	33942.3	33806	32846.7	37823.3	56384	53276.7	63400	65557	63242.3	68772.3	67904.3	70701.3	68921.7	72051.7	53796	57307.7	52747	57770.7	50643	71789.7	74417	69120.3	73087	80546	82456.7	81257	78242.3	81154	76021	35592	33322	35359.7	37241	35163.3
Transitional+endoplasmic+reticulum+ATPase+OS+Homo+sapiens+GN+VCP+PE+1+SV+4	90006.3	5098.95	33	TERA_HUMAN	126120	100483	80478.3	85152	76753	115078	89656.3	85786	84741.3	96293.7	61945.3	62262.7	71774.3	86385.3	64375.3	102247	87301.7	91328.7	83641	99644	116822	116100	115974	120593	126160	129361	96432.3	89139.7	171446	136343	77028.7	83530	80800.7	88170	80167.7	112048	114960	119951	112483	120344	88019	119671	101886	84512	99344
Protein+glutamine+gamma+glutamyltransferase+2+OS+Homo+sapiens+GN+TGM2+PE+1+SV+2	78469.5	3243.53	16	TGM2_HUMAN	58531	56315.7	62235.3	67104.7	74192.3	55352	57406	59779.3	58694	67000.7	47004.7	44259.3	49898	47857	52768.7	50064	54661.7	56929.3	56656.7	63026.7	38136.3	41474.3	40009.3	40988.3	34983	31168	30601.3	29186.7	30543.7	31324.3	69568	69908	69643.7	70588	71579.3	43899	47545.7	47519.7	57818.3	60248.7	41011	38393.7	33851.7	30757	31652.7
Acetyl+CoA+acetyltransferase+mitochondrial+OS+Homo+sapiens+GN+ACAT1+PE+1+SV+1	45484.8	2356.83	5	THIL_HUMAN	17643	17279.3	19973.7	20851.7	22461.7	20652.3	20561	21274	21850.7	21916.3	16812	16201.7	17729.7	18978	17185.3	16985	19519.3	19029.3	16841.3	14334.3	19704.3	27281	26978.3	26846.7	26358	34327	39456.3	38324.3	37414.3	34906.7	13183.3	23413	20925	25386	23165	28752.7	31773	28899.7	25443.3	30862.7	29265	32772.7	33935	36648	37437
THO+complex+subunit+4+OS+Homo+sapiens+GN+THOC4+PE+1+SV+3	26887.9	1159.29	4	THOC4_HUMAN	15419	11557.3	13791.5	14098.5	18200	8484	26957.7	18880.5	14747.7	21200	13071	9557	7779	5869.33	10593	8101	5320	7398	5953	15241.3	29004	32665.3	29553.3	30056.3	23355	30849.3	28326.7	30977.3	20131.7	20257.7	18073	15772	15727.3	14129.7	17961.7	33551.7	36913	34241.3	31469.3	32099	32875	31334.7	29675.3	23413.7	30588.7
Thy+1+membrane+glycoprotein+OS+Homo+sapiens+GN+THY1+PE+1+SV+2	18162.9	4745.99	2	THY1_HUMAN	65615	88410	67424.5	75037		67841	72862	90703	90295		84863	58237	71211.5	59722	98241	60245	72090	73160	93259	96500																					14610	17696	3344	4102
Transcription+intermediary+factor+1+beta+OS+Homo+sapiens+GN+TRIM28+PE+1+SV+5	90317.6	1187.47	6	TIF1B_HUMAN	39468.3	42661	44536.7	32795.3	25197.7	44231.3	46513.7	45749.3	42304.7	27748.3	19541.7	20034.3	32016.7	32477	22381.7	33823	42548.7	48191	42926.7	26090	21598.7	25317.7	26111	25578.7	32273.5	24294.7	23055	30060.7	28742.7	28127.3	29066.3	33762.3	32791.3	26974.3	23159	39451	42334	39107.3	40993	39721.7	45508.3	45844	37476.7	48309.7	42940.3
Transketolase+OS+Homo+sapiens+GN+TKT+PE+1+SV+3	68562.1	9699.94	25	TKT_HUMAN	116860	124078	121881	122570	129220	104908	111741	118936	116300	106550	93342	105697	103499	103960	108083	117733	108920	112141	119234	114405	127363	124344	125929	120050	122263	148994	148866	147892	147808	141457	122955	128378	125258	132087	123061	127065	134730	117890	130832	125238	199651	199935	204071	202882	204467
Talin+1+OS+Homo+sapiens+GN+TLN1+PE+1+SV+3	271935	6636.03	88	TLN1_HUMAN	103511	104058	91006.3	91942.3	117043	98249	98504.3	92567.7	91832.3	93058.7	93850	100911	102079	104937	102803	89479.7	98974	75203	83945.7	82226.3	73998.3	79753	65989.3	85740	88365.7	107077	83308.3	94841	68559.7	102348	84805.7	87943.3	86578.7	86926	92440.3	69106.7	69511	64745.3	72740.7	69872.7	78045.7	75187.3	70407	74303.3	72283.3
Tropomodulin+3+OS+Homo+sapiens+GN+TMOD3+PE+1+SV+1	39765.9	1091.28	2	TMOD3_HUMAN	14891.3	21229.7	19326.5	16544.5	17832.5	15373.7	19553	13773	17251.5	18264		7986.5	22012	19084		18801.7	18161	20850.5	19748.7	15338.5	14251.7	8555	12305.5	16858.5	17170		4262	1449	10453		14782	18336	16670.5	15003	16473.5	16095	15971.3	16719.7	11533.3	13548.7	6010	10150	4671	5377	8437
Triosephosphate+isomerase+OS+Homo+sapiens+GN+TPI1+PE+1+SV+2	26954.7	26260.1	15	TPIS_HUMAN	326628	338053	380233	364791	343850	270793	263231	310327	295326	286873	210210	270839	285845	277308	328025	316285	367086	321239	363348	371138	372335	354680	356106	361815	356931	325035	331970	330232	336707	325446	327359	317273	378302	375010	365936	320556	275268	330679	326556	273304	277084	289501	304225	298628	311849
Tropomyosin+alpha+1+chain+OS+Homo+sapiens+GN+TPM1+PE+1+SV+2	32765.6	5855.62	5	TPM1_HUMAN	16660.1	28902.6	17458.2	23420.7	16430.9	19286.8	20449.7	37053.7	25367.7	21563.4	38437.7	40739.1	29300.7	36765.9	42026.4	21023.6	35066.4	34579.2	39189.6	26808.3	15865	17469.4	16429.5	16460.9	15285.2	4773.15	5712.7	4084.47	4568.66	4900.1	22069	13921.2	14571.9	14755	13626.5	3831.09	3686.17	5836.58	5465.7	5882.89	8656.2	4381.82	7711.37	4698.22	4793.51
Tropomyosin+beta+chain+OS+Homo+sapiens+GN+TPM2+PE+1+SV+1	32964.8	6913.19	7	TPM2_HUMAN	12043.5	6385.98	12550.1	13554.4	12207.9	19675.2	20535.8	34736.7	31142.3	29219.4	32743.1	32682	32766.2	31501.7	21385.3	7107.38	7368.22	14955.8	14425.9	14112	10399.4	11019.9	10525.8	10839.9	10185.6	8383.04	7802.86	8054.29	9016.36	7669.14	18978.1	17595.9	17641.6	17500.5	16420.5	6947.83	6019.42	10346.4	9476.62	10348.2	1667.72	2270.57	1879.52	3454	4352.73
Tropomyosin+alpha+3+chain+OS+Homo+sapiens+GN+TPM3+PE+1+SV+1	32875.9	4181.35	3	TPM3_HUMAN	34864.6	35794.6	34566	35732.4	30575.1	46279.6	39599.8	42639.1	42194.2	40160.3	39326.3	39679.5	40392	40052.2	40895.9	39559	43086.3	40048.3	39555.7	37299.6	15865	17469.4	16429.5	16460.9	15285.2	14635.6	17516.5	15138.6	15972.8	15024.9	27533.2	28503.4	29158.4	29563.4	30915.1	32191.2	35657.3	32096.8	35115.5	31943.8	22343.7	21895.8	24629.3	25635.1	26526.6
Tropomyosin+alpha+4+chain+OS+Homo+sapiens+GN+TPM4+PE+1+SV+3	28635.9	11317.2	12	TPM4_HUMAN	118841	117750	121781	118770	129008	129696	129109	100521	128259	133204	129289	135627	130276	128451	133629	127352	131333	131961	130398	131359	63687.2	66600.1	61655.4	64297.6	50745.2	43735.9	41631.6	38600.6	41408.8	43043.2	135029	133911	133056	133133	133607	61319	63062.3	55363.3	65282.3	66251.2	16747.7	18859.3	19177.3	19636.3	20257.7
Heat+shock+protein+75+kDa+mitochondrial+OS+Homo+sapiens+GN+TRAP1+PE+1+SV+3	80395.3	3334.07	3	TRAP1_HUMAN	3199	3093		3791	9413.67		4101	4845	11787	5598			3547.5	3596.5	2227	3269	2921	2365	8690	8171.33	13132.7	13250.3	13006	16795	7371.67	15958	15268	22203	18574	13700	4350	4480.5	9481.67	10262	6613.33	15004.7	9929	15682	10133.3	12965.5	18594.3	22144	12982	17170.3	21940
Thrombospondin+1+OS+Homo+sapiens+GN+THBS1+PE+1+SV+2	133375	620.432	5	TSP1_HUMAN	17130.7	18010.3	19246.7	20339	29672	35213.3	35687.7	31700.3	36000	37435.3	43875.7	34639.3	21938	37168.7	40307.7	17937.7	19863	19623.7	19782.3	19934					9877						20962.3	18891.3	16590.3	16134	16927	14920.5	16545	16142.5	25075	21268	17525	13296	15249	15161	15788
Thioredoxin+domain+containing+protein+5+OS+Homo+sapiens+GN+TXNDC5+PE+1+SV+2	48313.2	3240.54	8	TXND5_HUMAN	64855	64629	63671.3	66421.3	70585.7	57715.3	55868	57633.7	54172.3	50053.3	59984.3	59301.3	63625	59839	69364.7	63670.3	66307.3	65360	69094.7	69689	47461.3	48479.7	49150	46163	52111.7	61435	27156	59145.7	65401.7	62634.3	66009.7	65922	62502	63998.7	68250.3	43587.3	49900.3	53723.7	55759.7	53892.3	20378.7	50679	50896	57557	14633
Splicing+factor+U2AF+65+kDa+subunit+OS+Homo+sapiens+GN+U2AF2+PE+1+SV+4	53843.3	1013.71	3	U2AF2_HUMAN	20808.3	22720.7	22232	15426.3	24583	20044	18647.5	23664.3	14706.3	20965	15130	20063	15452.5	15990	20675	20376.5	21415	22173.7	23056.3	16023	23735.7	18753	27676.3	28181.3	30205	23298.3	22959.7	30263.3	23756.7	34830.3	22573.3	23246.7	20750.7	28416.7	25252.7	37488.7	27502.7	27501.7	28574	29757.7	28948.7	25193	32886	32867	41231
U3+small+nucleolar+RNA+interacting+protein+2+OS+Homo+sapiens+GN+RRP9+PE+1+SV+1	52468	1368.07	2	U3IP2_HUMAN	4837	5465	4634	5771.5	7141	5093	5495.5	5483.5	5539.5	6248			5993	7181		5751	5198	5598	6223	5749	8130.67	7378	8698.5	8939	7905	8441	8859	8958.5	9510.5	5617	6888.5	7188	6623.5	7059.5	6706.5	8413	8191.5	7953	7915	7997	5927	8469.5	10243	9581	8724.5
116+kDa+U5+small+nuclear+ribonucleoprotein+component+OS+Homo+sapiens+GN+EFTUD2+PE+1+SV+1	110405	772.528	4	U5S1_HUMAN	1495.92	4761.83	3962.45	1503.9	3389.76	2333.3	7145	4435.33	3967.6	6510.82	2079.94	3383.96	4978.92	5354.04	2978.08	4016.14	1417.54	4854.67	5290.89	5476.33	5078.12	1737.91	5125.22	8010.54	4981.44	6891.4	8641.67	6346	6696	7336.35	4869	2154.07	5482.1	4636.33	3261.03	6262	6547.67	11735	5628.33	8326.33	8022	5343	7635.33	5378.9	7323.33
Ubiquitin+like+modifier+activating+enzyme+1+OS+Homo+sapiens+GN+UBA1+PE+1+SV+3	118933	5045.42	31	UBA1_HUMAN	70928.7	56746.3	62972	62836.3	62515	63444.3	71604	60517.7	62306	52513	62394.3	62456.7	51162	63755.7	59758	72215	62534	70706	61721	63413.3	55420.3	57958	58437.3	57683.7	59074	73127.7	74976	74725	76851	73909.7	63453.3	60221	60859.3	55452.7	61026.3	69542.3	64802	64141.7	58961.3	61335.7	76881.7	76338.3	76145.3	83656.7	77770
Ubiquitin+conjugating+enzyme+E2+N+OS+Homo+sapiens+GN+UBE2N+PE+1+SV+1	17194.9	6245.86	4	UBE2N_HUMAN	33814	34227	35607.3	38596.5	33177.7	30517.7	32390.7	34559.3	41086.5	33064	13973	23563.7	24156	22741.7	23461.7	35136.3	34303.7	34834.7	35939	29649.3	33108.3	26265.7	27331.3	25965.7	27779	36570	35499	40387.3	40781.3	34032.3	33016	37262.7	35293	32008.7	33392.7	34845.3	34893.7	40553.3	36614.3	41604.7	41096	21072.7	24873.7	25172	26376
Ubiquitin+carboxyl+terminal+hydrolase+isozyme+L1+OS+Homo+sapiens+GN+UCHL1+PE+1+SV+2	25166.6	8464.1	8	UCHL1_HUMAN	94031.7	83559	81998.7	90363	87152.3	77724	68109.3	70639	71566	69037.3	68584.7	66206.3	62465.3	72169	70075.7	81535	81439.7	82849	82435.3	81757.7	104672	106819	101967	123955	91148.7	129361	121735	127377	124502	108147	76296.7	81490.3	83808	82550	82304	104565	105379	107041	105943	106699	96509.3	96118.7	95128.3	95312	90335.7
UDP+glucose+6+dehydrogenase+OS+Homo+sapiens+GN+UGDH+PE+1+SV+1	55708.5	4111.98	14	UGDH_HUMAN	49823	53542	52738.7	54493.3	56076.3	47727.3	48459	54065.3	51005.7	45483.3	42736.7	42914.3	49623.3	37690.7	46702.7	50243	53186.3	52497.7	53592	56080.7	31102.3	40616.7	46012.3	40592.3	45163.7	33693.7	44649.7	47027.7	32659.3	42640	50911.7	50289.7	53803.7	53315	58272.7	30468	36046.3	36293.7	39497.7	37702.3	44277.7	29305.3	51623.3	26500.3	47073
UDP+glucose+glycoprotein+glucosyltransferase+1+OS+Homo+sapiens+GN+UGGT1+PE+1+SV+3	177931	439.55	6	UGGG1_HUMAN	18505.7	19032	18039.7	18684	19857.7	17755.7	18907	18474.3	19933.7	20122.7	17253.3	19339.3	19254.7	19320.7	20788.7	17706	19848.7	20073.7	17921.3	20401.7	18599.7	20970.7	18875	19407.7	18350.3	15514.3	21689.3	18067.3	19897.7	18668.7	20946.7	22181.3	22670.3	22300.3	20556.7	21053.3	20152.3	19633	19161	20070.7	20877	16619.7	16875	15461	15104
UTP+glucose+1+phosphate+uridylyltransferase+OS+Homo+sapiens+GN+UGP2+PE+1+SV+5	57111.4	1057.45	6	UGPA_HUMAN	39059.7	38461	38670.7	32845.7	38269.7	31748	27901.7	30264.7	30352.7	22299	33110.7	31958.3	33096	31084.7	34442.3	37678.7	38695.7	36359	38744.7	42418.3	24366	24207	30972.5	27691	20065.7	24736.3	21073	29804	24506.3	23549	37062.3	40752.7	40590	44028	38308	27086	28814.7	29540	32749.7	26242.3	19197	27118.3	21159.3	24851.3	27501
Synaptic+vesicle+membrane+protein+VAT+1+homolog+OS+Homo+sapiens+GN+VAT1+PE+1+SV+2	42148.5	1786.13	4	VAT1_HUMAN	28641	31987.5	46629	45324.3	42173.7	22456.7	20826.3	23945	22003.3	21151	24707.7	28773.7	25643.7	24849.7	23990	29150.7	31739	26413.3	41888.3	22917.7	51530.7	51245	52037.7	52351.3	50878	40339.3	50081	53067.7	50882	37645.7	46339.7	43546.3	43899.3	41484.3	43262.7	37321.5	45749.3	44124	28278	40915.3	63097.7	53798	51049.3	52277.7	49689.7
V+type+proton+ATPase+subunit+E+1+OS+Homo+sapiens+GN+ATP6V1E1+PE+1+SV+1	26202.4	1738.54	2	VATE1_HUMAN	6515.5	9218	9296	15089	9653	8837.5	11023	10329	10066	10689.5		17302	18068	14158	18669	7200.5	15644	16703	9612	10207.5	18200.5	17798	17539	16683.5	17518.5	19596.5	21278.5	20152	20311	18525	11458.5	11293.5	11565	10567.5	10668.5	22006	19707.5	20370	21366	19779.5	16589	21326	17589.5	16556	17639
Voltage+dependent+anion+selective+channel+protein+1+OS+Homo+sapiens+GN+VDAC1+PE+1+SV+2	30886.7	5870.6	13	VDAC1_HUMAN	88100.7	82844.3	86674.7	91471.7	89650	69325.3	83889	77464.3	85096	91427	80333	71352.7	88597.7	93916.7	91388.7	88581.7	90051.7	86382.7	89196	97891.3	106846	100910	104944	99249	97596	77688	73960	72668.3	70128	80199.3	92542.3	95048.3	97963.7	94304	92108.3	107274	105397	79407.3	100342	103508	88527.7	73218	79139	69464.3	77231
Voltage+dependent+anion+selective+channel+protein+2+OS+Homo+sapiens+GN+VDAC2+PE+1+SV+2	32079.8	2803.97	9	VDAC2_HUMAN	72753	58260	61619.7	62477.7	57986	60494.7	62572.7	53241.7	52850.3	46721.3	69916.3	70214.7	53700	68461.3	61668	72046.7	71883.7	76213	69961	68443.3	71372.7	69455.7	73906.3	72581	71106.7	72646.3	73565.7	75193.3	72623	69206.3	59685	62186.3	63801.7	62099.3	58937	60043.7	57134	61367.3	60978.3	65532	59778.3	59540	63093	58808.7	60100
Vigilin+OS+Homo+sapiens+GN+HDLBP+PE+1+SV+2	142083	880.334	29	VIGLN_HUMAN	47210.3	48535	46757.7	42374	43444.7	45024.7	46287.3	44080.7	45701	45123.3	38615.3	37424.3	39048.3	39776.7	36003.7	54162	45429.7	48005	51120.3	48695.7	49843.3	39503.3	35590.3	36252.3	38910	99374.7	96436.3	59139	97314.7	48804.3	48204	50901.3	53326.7	51136.7	48336.7	46982.7	49893.7	43954	49436.3	45702.7	42178.7	41812	41300.3	41427.7	43735.7
Vimentin+OS+Homo+sapiens+GN+VIM+PE+1+SV+4	53708.8	68945.8	40	VIME_HUMAN	1.58782e+06	1617497	2.41115e+06	2.47647e+06	1572568	2024014	1.8076e+06	1949944	2459525	1.82456e+06	1730303	1.69181e+06	1.68114e+06	1.7268e+06	1.47491e+06	1899943	1834640	1.72588e+06	1.56646e+06	1896754	1.47943e+06	1.99319e+06	1341950	1.74062e+06	1.99159e+06	782194	807077	840887	809241	741719	1.49233e+06	1953240	1.51818e+06	2367080	1.44434e+06	1838513	1.32056e+06	1.77954e+06	1.80767e+06	1.37311e+06	805422	816133	851357	847621	811279
Vinculin+OS+Homo+sapiens+GN+VCL+PE+1+SV+4	124370	4744.33	50	VINC_HUMAN	95885.3	104151	102219	122130	123433	88710.3	88164.3	85836.7	105525	106131	88196.3	94697	85802.7	87880.3	104081	99976.7	100909	107477	100231	108239	84630.7	94695.3	83960.7	73706.3	94709	77389.3	63945.7	69640	65636.7	74114	107416	105820	104912	106687	120241	98621.3	97709	90922	92031.7	94259.3	92071.7	67706	85882.7	87522.7	88754.7
WD+repeat+containing+protein+1+OS+Homo+sapiens+GN+WDR1+PE+1+SV+4	66877.9	3370.93	17	WDR1_HUMAN	79573.3	75060.3	83922.7	78804.7	84215.7	83592	87446.7	88955	87078.3	88562	78593.7	83806.3	83593.7	80815.7	79559	69726.7	72092.7	70431.3	72350.7	77536.7	71732.3	59073.3	60391.7	68255.7	57428.7	73145	70714.3	72800.7	73849.7	72658	85056.3	84921.7	85659.3	83479.7	85849	74325.7	71793.3	69159.3	72348.7	70436.3	73704.7	70468	74468.7	69283.7	66343.7
Exportin+1+OS+Homo+sapiens+GN+XPO1+PE+1+SV+1	124527	1350.19	15	XPO1_HUMAN	59438.3	53721	53783.7	53217	32202.7	48170.7	54621.3	55955.7	38225.7	41615.3	34853.3	31882.7	30514	36617.3	46229	30803.3	50888	52579.3	52690	48706	46003	48983	48240	45922	44235	29749	42611	40435.7	42986.3	40751.3	33594	35643	49336.7	34735	32138	48001.3	60806	47950.3	43458	48390	48929.7	35238	51970.7	47723.3	47828.7
Exportin+2+OS+Homo+sapiens+GN+CSE1L+PE+1+SV+3	111215	2158.99	19	XPO2_HUMAN	21332.3	25300	24356.3	25367.3	22112.3	22306.7	24662	25765.7	24888.7	26595	16173.3	21289.3	22503.3	23633	18516.3	22727.7	25935	25681.3	28110	22072	25282.7	24341.3	25309.3	24855.3	28839.7	27143.7	27677.3	30085.7	29707	26783.7	24516	22590	22746	22551	21627	25693.3	26545.7	27525.3	28960.3	25857.7	33443.3	33446	36036.3	30001	37476.3
X+ray+repair+cross+complementing+protein+5+OS+Homo+sapiens+GN+XRCC5+PE+1+SV+3	83275	1979.26	24	XRCC5_HUMAN	77722.7	69464.7	69740	71446	42028.7	81980.7	85119.7	82300.3	77435.7	72816.7	50826.7	52194.3	51468.7	48783	51602.3	62011.7	57706	55869.3	63331.3	61209.7	47368.3	86771	82523.3	83269.3	84664	38701.3	41096	43999.7	82088.7	85779.7	78000.3	70781.7	82491	42025.3	40726.7	143341	116077	125337	107452	116889	99215.7	99277.7	99510	93905.3	90804
X+ray+repair+cross+complementing+protein+6+OS+Homo+sapiens+GN+XRCC6+PE+1+SV+2	70128.3	2849.84	19	XRCC6_HUMAN	41413.3	42137.7	50054.7	48316.3	41337.3	45777.3	44919.7	50783.7	50063.3	50642.3	26192	37725	41141.7	44662.3	39020	44562.7	48519.3	43720.7	47216	47055.3	63247.3	61902	67116.3	67865.3	70684.7	57063.7	54004	60046	65492.3	56516.7	47284.3	46961	43758.3	49134	43175.7	66086.7	60279.3	69115.7	65679.3	67528.7	70950.7	64501	70833.3	67763.7	58669.7
Nuclease+sensitive+element+binding+protein+1+OS+Homo+sapiens+GN+YBX1+PE+1+SV+3	35924.2	6576.1	6	YBOX1_HUMAN	51212.7	55354.1	56096.1	52907.6	51058.6	56778	61761.6	62083.6	63507.8	61833.1	28767.5	32233	32213.2	30885.1	40030.1	37739.6	39469.6	40746.5	53569.8	54025.8	133847	122323	129919	131561	133187	128460	123762	114062	123048	115244	48122.3	50745.2	53214	52418.8	41131.2	114898	111126	116728	109798	108569	128410	144170	138507	144950	147459
Putative+tubulin+beta+chain+like+protein+ENSP00000290377+OS+Homo+sapiens+PE+5+SV+2	42231.4	5214.85	5	YI016_HUMAN	529.842	1077.71	521.922	872.269	1135.1	489.283	527.347	482.251	1453.73	1413.71	562.486	981.094	1242.13	798.833	1116.79	377.034	357.683	356.913	908.248	674.191	7078.74	4105.08	2834.63	2721.59	2902.62	1768.41	4905.64	1525.07	716.381	680.541	1378.14	3063.15	2954.9	3457.23	5052.78	2540.11	725.986	2060.88	1165.97	1611.06	506.254	1827.85	1627.46	2073.92	614.021
Zyxin+OS+Homo+sapiens+GN+ZYX+PE+1+SV+1	62475	2612.34	10	ZYX_HUMAN	59633.7	58811.7	55077.3	58098.7	50054.3	55354.3	53899	52552	54606.3	48522.7	48887.7	48154	44941	52254.3	48064.3	53159.7	48812	50758.7	50884.3	53465	21967.3	21690.3	22370.3	21036.7	21437.3	13800	14791.3	16573	15755.7	12876.7	54708.7	61177	57413.3	55210.3	48420.3	26999	28716.3	27800.7	26782.3	29420.3	16846.7	16492	14477.7	16432.3	17009.3
Trypsin+precursor	25093.8	3578.23	4	TRYP_PIG	37076.7	48734	23080.3	36912.7	17210.5	63341	74235.3	74064	75672	73884.7	38844.7	74026.7	84169	85308.3	71448	54551.3	69919.7	57887.7	66412	67969.3	53095.5	69938	38223	25467.3	37338	15549	15800	7615.5	23543	27094.3	43069	43940.7	34765.7	44695.7	44263.7	42099.7	41538.7	40726.7	38430	38917	36887.7	37241	32554	22710	34748.3
Enolase+1+OS+Saccharomyces+cerevisiae+GN+ENO1+PE+1+SV+2	46859.2	6839.04	8	ENO1_YEAST	22224.2	18584.2	17393.9	18713.9	19196.2	22398.3	14896.5	13176.2	17849.7	20321.9	22101.4	21133.7	21785.6	21109.7	22300.8	21831.1	18881.7	18901	14463.1	20154.2	16554.3	18553.7	23807.3	22335.3	24827.7	25197.7	22931.7	26308	26754.3	15397.4	17545	13015.3	14163.7	17857.4	11166.7	13088.1	15499.3	18018.3	23161.3	18295	14616.7	16285	17633	16434.4	15524.4
Enolase+2+OS+Saccharomyces+cerevisiae+GN+ENO2+PE+1+SV+2	46971.3	6896.06	11	ENO2_YEAST	46601.7	40426.1	47593.4	35454.5	31258	44629.8	52144.3	48089.3	44566	40888.7	51216.7	43680	40780.4	44371.3	52657	39904.2	44426.3	45438.2	39589	53472	45719.6	46196.7	41411.3	40490.7	40058.3	28154.7	28252	22406.6	27800.3	22776.2	29274	24852.3	26244.7	20954.2	33952.7	55781.3	52794.3	51633.3	62468	31105.7	25896.3	23385.2	28239.9	25600.7	19817
[truncated: 9 more columns]
